# Supplementary material
Source: Elsevier journal article supplement (https://www.sciencedirect.com/science/article/pii/S0210569120303338)
Supplement: mmc1 [file S0210569120303338:mmc1.pdf]

***Recomendaciones sobre la utilización de la ventilación no invasiva y terapia de alto flujo con cánulas nasales en el paciente adulto, pediátrico y neonatal con insuficiencia respiratoria aguda grave. Documento de Consenso de las Sociedades Científicas Españolas (SEPAR, SEMICYUC, SEMES; SECIP, SENEo, SEDAR, SENP).***

Palabras clave:

Ventilación no invasiva, recomendaciones, insuficiencia respiratoria aguda, terapia de alto flujo con cánulas nasales, consenso

## Documento Español de Consenso sobre la utilización del Soporte Respiratorio No Invasivo en el paciente con Insuficiencia Respiratoria Aguda grave

### Relaciones con la industria y otros conflictos.

La política desde las Juntas Directivas de la SEPAR/SEMICYUC ha sido patrocinar las reuniones de trabajo y los documentos de posición y consenso sin apoyo comercial, y todos los miembros del CC y del GT se ofrecieron como voluntarios. Por lo tanto, al final de este documento, todos los miembros del CC y del GT, así como los revisores, han revelado cualquier posible conflicto de intereses en detalle y dichos conflictos han sido recogidos por la coordinación del presente documento.

# Índice

|                                                                                                                         |           |
|-------------------------------------------------------------------------------------------------------------------------|-----------|
| <b>Índice .....</b>                                                                                                     | <b>3</b>  |
| <b>Avaless .....</b>                                                                                                    | <b>7</b>  |
| <b>Autores del Grupo de Trabajo.....</b>                                                                                | <b>8</b>  |
| <b>Resumen .....</b>                                                                                                    | <b>11</b> |
| <b>Abstract .....</b>                                                                                                   | <b>12</b> |
| <b>1. Introducción .....</b>                                                                                            | <b>13</b> |
| <b>2. Justificación.....</b>                                                                                            | <b>15</b> |
| <b>3. Métodos.....</b>                                                                                                  | <b>16</b> |
| 3.1. Definiciones .....                                                                                                 | 17        |
| 3.2. Estrategia de búsqueda.....                                                                                        | 18        |
| 3.3. Estrategia de acuerdo .....                                                                                        | 20        |
| <b>PRIMERA PARTE:</b>                                                                                                   |           |
| <b>¿A quién debe indicarse el soporte respiratorio no invasivo?.....</b>                                                | <b>23</b> |
| <b>4. Indicaciones de la VMNI .....</b>                                                                                 | <b>24</b> |
| 4.1. Pacientes en edad adulta con necesidad de soporte urgente previo a la obtención de un diagnóstico de certeza ..... | 24        |
| 4.2. Indicación de VMNI en el paciente en edad adulta con diagnóstico de certeza .....                                  | 26        |
| 4.2.1. Enfermedad pulmonar obstructiva crónica (EPOC) agudizada .....                                                   | 26        |
| 4.2.2. Edema agudo de pulmón cardiogénico (EAPc) .....                                                                  | 28        |
| 4.2.3. Descompensaciones respiratorias de pacientes con Síndrome de Hipoventilación Obesidad (SHO) .....                | 29        |
| 4.2.4. VMNI en situación paliativa .....                                                                                | 29        |
| 4.2.5. Agudización grave del asma (AGA).....                                                                            | 30        |
| 4.2.6. Insuficiencia respiratoria hipoxémica <i>de novo</i> .....                                                       | 30        |
| 4.2.7. Pacientes con insuficiencia respiratoria aguda y órdenes de no intubar.....                                      | 33        |
| 4.2.8. Enfermedades neuromusculares .....                                                                               | 33        |
| 4.2.9. Traumatismo torácico .....                                                                                       | 34        |
| 4.2.10. VMNI en <i>weaning</i> y extubación .....                                                                       | 34        |
| 4.2.11. VMNI en cuadros de pandemias virales.....                                                                       | 37        |
| 4.2.12. Insuficiencia respiratoria aguda postoperatoria .....                                                           | 38        |

## Documento Español de Consenso sobre la utilización del Soporte Respiratorio No Invasivo en el paciente con Insuficiencia Respiratoria Aguda grave

|                                                                                                          |           |
|----------------------------------------------------------------------------------------------------------|-----------|
| 4.3. Indicaciones de VMNI en el paciente en edad pediátrica .....                                        | 39        |
| 4.3.1. IRA global (hipoxemia con hipercapnia) y prevención a la reintubación .....                       | 39        |
| 4.3.2. IRA hipoxémica sin hipercapnia .....                                                              | 39        |
| 4.3.3. Pacientes en edad pediátrica con IRA en el contexto de crisis asmática grave .....                | 41        |
| 4.3.4. Miscelánea .....                                                                                  | 41        |
| 4.4. Indicaciones de VMNI en neonatología .....                                                          | 42        |
| 4.4.1. Estabilización inicial tras el nacimiento.....                                                    | 42        |
| 4.4.2. Síndrome de Distrés Respiratorio (patología propia del prematuro por déficit de surfactante)..... | 43        |
| 4.4.3. Prevención de IRA tras la extubación.....                                                         | 43        |
| 4.4.4. Otras patologías respiratorias neonatales .....                                                   | 43        |
| 4.4.5. Causas extrarespiratorias.....                                                                    | 43        |
| <b>5. Indicaciones de la terapia de alto flujo con cánulas nasales .....</b>                             | <b>45</b> |
| 5.1. Indicaciones de la TAFCN en adultos .....                                                           | 45        |
| 5.1.1. IRA en neumonía y síndrome de distrés respiratorio agudo.....                                     | 45        |
| 5.1.2. IRA en inmunodeprimidos.....                                                                      | 46        |
| 5.1.5. Prevención de fracaso respiratorio y reintubación tras la extubación .....                        | 46        |
| 5.1.6 Pre-oxigenación antes de la intubación .....                                                       | 48        |
| 5.1.7 Miscelánea .....                                                                                   | 49        |
| 5.2. Indicaciones de TAFCN en el paciente en edad pediátrica .....                                       | 51        |
| 5.3. Indicaciones en neonatología de la TAFCN .....                                                      | 53        |
| <b>6. Consideraciones específicas del uso de VMNI en entorno prehospitalario .....</b>                   | <b>54</b> |
| <b>7. Contraindicaciones del soporte respiratorio no invasivo .....</b>                                  | <b>55</b> |
| <b>SEGUNDA PARTE:</b>                                                                                    |           |
| <b>¿CÓMO REALIZAR EL SOPORTE RESPIRATORIO NO INVASIVO? .....</b>                                         | <b>57</b> |
| <b>8. Estratificación de riesgo.....</b>                                                                 | <b>58</b> |
| <b>9. Entorno físico y dotación de personal .....</b>                                                    | <b>60</b> |
| 9.1. Particularidades de la aplicación en medio prehospitalario .....                                    | 60        |
| 9.2. Unidades hospitalarias de paciente adulto.....                                                      | 60        |
| 9.3. Unidades pediátricas.....                                                                           | 62        |
| 9.4. Unidades de neonatos .....                                                                          | 62        |
| <b>10. Necesidades de material y tecnología .....</b>                                                    | <b>63</b> |
| 10.1. Ventiladores.....                                                                                  | 63        |
| 10.1.1. Características deseables en los ventiladores utilizados para VMNI en paciente adulto 63         |           |
| 10.1.2. Dispositivos para la aplicación de VMNI en pediatría .....                                       | 64        |

## Documento Español de Consenso sobre la utilización del Soporte Respiratorio No Invasivo en el paciente con Insuficiencia Respiratoria Aguda grave

|                                                                                                      |            |
|------------------------------------------------------------------------------------------------------|------------|
| 10.1.3. Dispositivos para la aplicación de VMNI neonatal .....                                       | 65         |
| 10.2. Material fungible .....                                                                        | 65         |
| 10.2.1. Tubuladuras y sistemas de válvula espiratoria .....                                          | 65         |
| 10.2.2. Interfases.....                                                                              | 66         |
| 10.2.3. Humidificación y aerosolterapia. Dispositivos e indicaciones.....                            | 72         |
| 10.2.4. Aerosolterapia.....                                                                          | 73         |
| 10.2.5. Dispositivos de CPAP .....                                                                   | 74         |
| 10.2.6. Dispositivos de TAFCN.....                                                                   | 75         |
| <b>11. Programación de dispositivos .....</b>                                                        | <b>77</b>  |
| 11.1. Breve recuerdo de los modos ventilatorios .....                                                | 77         |
| 11.1.1. Variables de clasificación de los modos ventilatorios .....                                  | 77         |
| 11.1.2. Modos de ventilación y parámetros a programar en la ventilación controlada por presión ..... | 78         |
| 11.1.3. Otros sistemas de asistencia respiratoria: CPAP y TAFCN.....                                 | 82         |
| 11.2. Programación de los dispositivos.....                                                          | 83         |
| 11.2.1. VMNI en el paciente adulto .....                                                             | 83         |
| 11.2.2. Programación de ventilación en pediatría .....                                               | 86         |
| 11.2.3. Protocolo de inicio de la VMNI en el neonato .....                                           | 87         |
| 11.2.4. Programación específica de la TAFCN .....                                                    | 87         |
| <b>TERCERA PARTE: SEGUIMIENTO Y MONITORIZACION .....</b>                                             | <b>89</b>  |
| <b>12. Procedimiento de monitorización y controles de la VMNI /TAFCN en adultos .....</b>            | <b>90</b>  |
| 12.1. Parámetros fisiológicos .....                                                                  | 90         |
| 12.2. Parámetros del intercambio gaseoso y electrocardiograma .....                                  | 91         |
| 12.3. Parámetros del ventilador .....                                                                | 92         |
| <b>13. Criterios de fracaso. Acciones terapéuticas en caso de fracaso.....</b>                       | <b>95</b>  |
| 13.1. Fracaso de la VMNI .....                                                                       | 95         |
| 13.1.1. Criterios de fracaso de la VMNI.....                                                         | 95         |
| 13.1.2. Fracaso en función del tipo de patología de base.....                                        | 97         |
| 13.1.3. Fracaso en función del tiempo de VMNI.....                                                   | 97         |
| 13.4. Acciones terapéuticas en el fracaso de la VMNI .....                                           | 98         |
| <b>14. Criterios de retirada de la VMNI/TAFCN tras control del fallo respiratorio agudo.....</b>     | <b>101</b> |
| 14.1. Retirada de la VMNI .....                                                                      | 101        |
| 14.1.1. En la EPOC agudizada .....                                                                   | 101        |
| 14.1.2. En enfermedades neuromusculares y de la caja torácica .....                                  | 102        |
| 14.1.3. En el Síndrome de Hipoventilación-Obesidad .....                                             | 103        |
| 14.2. Retirada de la TAFCN .....                                                                     | 103        |

## Documento Español de Consenso sobre la utilización del Soporte Respiratorio No Invasivo en el paciente con Insuficiencia Respiratoria Aguda grave

|                                                                                                                                                                 |            |
|-----------------------------------------------------------------------------------------------------------------------------------------------------------------|------------|
| <b>15. Criterios para continuar con ventilación domiciliaria a largo plazo .....</b>                                                                            | <b>104</b> |
| 15.1. EPOC con hipercapnia tras retirada VMNI .....                                                                                                             | 104        |
| 15.2. SAHS vs SHO .....                                                                                                                                         | 105        |
| 15.3. Enfermedades restrictivas (alteraciones caja torácica, patología diafragmática, enfermedades neuromusculares lenta o rápidamente progresivas, etc.) ..... | 106        |
| 15.2. VMNI en situación paliativa .....                                                                                                                         | 106        |
| <b>16. Seguimiento específico en pediatría .....</b>                                                                                                            | <b>108</b> |
| 16.1. Evaluación de la eficacia de la VMNI.....                                                                                                                 | 108        |
| 16.2. Análisis del fracaso de la VMNI .....                                                                                                                     | 113        |
| 16.3. Discontinuación .....                                                                                                                                     | 114        |
| 16.4. Derivación a una unidad de ventilación crónica .....                                                                                                      | 115        |
| <b>17. Seguimiento específico en neonatología .....</b>                                                                                                         | <b>116</b> |
| 17.1. Controles de eficacia de la VMNI en el neonato.....                                                                                                       | 116        |
| 17.2. Fracaso de la CPAP/VMNI en neonatología .....                                                                                                             | 117        |
| 17.3. Opciones terapéuticas en caso de fracaso.....                                                                                                             | 118        |
| 17.4. Procedimiento de mantenimiento, complicaciones y discontinuación o retirada de la VMNI .....                                                              | 118        |
| 17.4.1. Mantenimiento .....                                                                                                                                     | 118        |
| 17.4.2. Complicaciones. ....                                                                                                                                    | 119        |
| 17.4.3. Discontinuación/retirada .....                                                                                                                          | 120        |
| <b>18. Complicaciones asociadas al SRNI .....</b>                                                                                                               | <b>121</b> |
| <b>19. Conclusiones.....</b>                                                                                                                                    | <b>124</b> |
| <b>20. Referencias.....</b>                                                                                                                                     | <b>132</b> |
| <b>21. Abreviaturas .....</b>                                                                                                                                   | <b>155</b> |

## Avaless

Sociedad Española de Neumología y Cirugía Torácica [SEPAR], Sociedad Española de Medicina Intensiva Crítica y Unidades Coronarias [SEMICYUC], Sociedad Española Medicina de Urgencias y Emergencias [SEMES]; Sociedad Española de Cuidados Intensivos Pediátricos [SECIP] la Sociedad Española de Neonatología [SENeo], Sociedad Española de Neumología Pediátrica [SENP] y la Sociedad Española de Anestesiología y Reanimación [SEDAR]

*Logos de las Sociedades.*

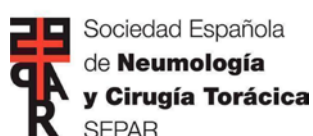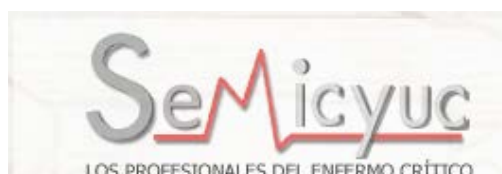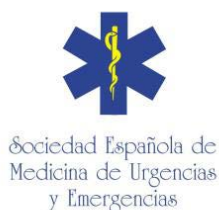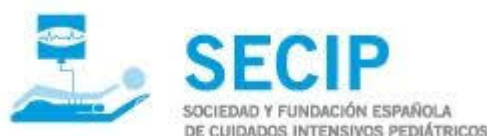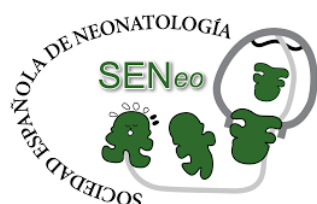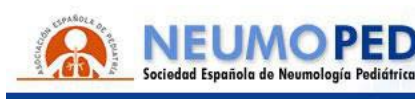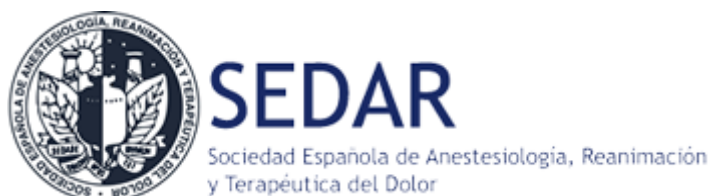

## Autores del Grupo de Trabajo

- Manel Luján. Servicio de Neumología. Hospital Universitari Parc Taulí de Sabadell. Universitat Autònoma de Barcelona. CIBERES.
- Óscar Peñuelas. Servicio de Medicina Intensiva y Grandes Quemados, Hospital Universitario de Getafe, Madrid. CIBER de Enfermedades Respiratorias, CIBERES; España. Grupo de Trabajo de SEMICUYC de Insuficiencia Respiratoria Aguda.
- César Cinesi Gómez. Servicio de Urgencias, Hospital General Universitario Reina Sofía, Murcia, España. Electronic address: [cesarcinesi@gmail.com](mailto:cesarcinesi@gmail.com)
- Alberto García-Salido, Servicio de Cuidados Intensivos Pediátricos e Investigador Postdoctoral en el Laboratorio de Investigación Biomédica del Hospital Infantil Universitario Niño Jesús, Madrid. [citopensis@yahoo.es](mailto:citopensis@yahoo.es)
- Julio Moreno Hernando. Servicio de Neonatología. Hospital Universitari Sant Joan de Déu. Barcelona. [jmoreno@sjdhospitalbarcelona.org](mailto:jmoreno@sjdhospitalbarcelona.org)
- Antonio Romero Berrocal. Servicio de Anestesia y Reanimación. Hospital Universitario Puerta de Hierro-Majadahonda (Madrid).
- Iñaki Gutiérrez Ibarluzea. Fundación vasca de innovación e investigación sanitarias.
- Juan Fernando Masa Jiménez. Servicio de Neumología, hospital San Pedro de Alcántara , Cáceres. CIBER de enfermedades respiratorias (CIBERES), Madrid. Instituto Universitario de Investigación Biosanitaria de Extremadura (INUBE).
- Arantxa Mas. Servei de Medicina Intensiva. Hospital de Sant Joan Despí Moisès Broggi i Hospital General d'Hospitalet. Grupo de Trabajo de SEMICUYC de Insuficiencia Respiratoria Aguda
- José Manuel Carratalá Perales. Servicio de Urgencias-Unidad de Corta Estancia. Hospital General Universitario. Alicante. [batbueno@hotmail.com](mailto:batbueno@hotmail.com)
- Mirella Gaboli. Neumología Pediátrica y Unidad de Cuidados Intensivos Pediátricos. Hospital Universitario Virgen del Rocío, Sevilla. [mgaboli@hotmail.com](mailto:mgaboli@hotmail.com)
- Ana Concheiro Guisán. Unidad de Neonatología. Hospital Alvaro Cunqueiro. Vigo. [acongui@gmail.com](mailto:acongui@gmail.com)



## Documento Español de Consenso sobre la utilización del Soporte Respiratorio No Invasivo en el paciente con Insuficiencia Respiratoria Aguda grave

- 
- Javier García Fernández. Servicio de Anestesia, Cuidados Críticos quirúrgicos y dolor. Hospital Universitario Puerta de Hierro-Majadahonda (Madrid)
- Joaquín Escámez. Servicio de Urgencias. Hospital Virgen de los Lirios Alcoy.
- Julio Parrilla Parrilla. Unidad de Cuidados Intensivos Pediátricos. Hospital Universitario Virgen del Rocío, Sevilla. [julioparrill@hotmail.com](mailto:julioparrill@hotmail.com)
- Eva Farrero Muñoz. Servei de Pneumologia Hospital Universitari de Bellvitge. Hospitalet de Llobregat.
- Mónica González. Unidad de Sueño y Ventilación. Servicio de Neumología. Hospital Universitario Marqués de Valdecilla de Santander. Universidad de Cantabria. Instituto de investigación Marqués de Valdecilla, IDIVAL
- Sarah Béatrice Heili-Frades. Jefe Asociado de Neumología. Unidad de Cuidados Intermedios Respiratorios. Hospital Universitario Fundación Jiménez Díaz Quirón Salud. IIS. CIBERES, REVA Network, EMDOS. E-mail: [sheili@fjd.es](mailto:sheili@fjd.es); Twitter: @SheiliSarah.
- María Ángeles Sánchez Quiroga. Servicio de Neumología. Hospital Virgen del Puerto de Plasencia. Centro de Investigación Biomédica en Red de Enfermedades Respiratorias (CIBERES), ISCIII, Madrid. Instituto Universitario de Investigación Biosanitaria en Extremadura, INUBE, Cáceres. [mariansanqui@gmail.com](mailto:mariansanqui@gmail.com)
- Gemma Rialp Cervera. Servicio de Medicina Intensiva. Hospital Universitari Son Llàtzer, Palma de Mallorca [grialp@gmail.com](mailto:grialp@gmail.com). Grupo de Trabajo de SEMICUYC de Insuficiencia Respiratoria Aguda
- Gonzalo Hernández. Servicio de Medicina Intensiva. Hospital Virgen de la Salud (Toledo). Grupo de Trabajo de SEMICUYC de Insuficiencia Respiratoria Aguda
- Ana Sánchez Torres. Servicio de Neonatología. Hospital Universitario La Paz. Madrid. [anasancheztorres@gmail.com](mailto:anasancheztorres@gmail.com)
- Rafael Uña. Servicio de Anestesia y Reanimación. Hospital Universitario La Paz (Madrid)

## Documento Español de Consenso sobre la utilización del Soporte Respiratorio No Invasivo en el paciente con Insuficiencia Respiratoria Aguda grave

- Carlos Ferrando Ortola. Jefe de Sección Área de Cuidados Intensivos Quirúrgicos, Servicio de Anestesia y Cuidados Intensivos, Hospital Clínic, Barcelona.
- Miquel Ferrer Monreal. Servei de Pneumologia. Hospital Clínic i Provincial. Barcelona.
- Carlos Egea Santaolalla. Unidad Funcional de Sueño, Hospital Universitario Araba. OSI araba, Vitoria-Gasteiz, España

## Resumen

El soporte respiratorio no invasivo (SRNI) comprende dos modalidades de tratamiento, la ventilación mecánica no invasiva (VMNI) y la terapia de alto flujo con cánulas nasales (TAFCN) que se aplican en pacientes adultos, pediátricos y neonatales con insuficiencia respiratoria aguda (IRA). Sin embargo, el grado de acuerdo entre las distintas especialidades sobre el beneficio de estas técnicas en diferentes escenarios clínicos es controvertido. El objetivo del presente consenso fue elaborar una serie de recomendaciones de buena práctica clínica para la aplicación de soporte no invasivo en pacientes con IRA, avaladas por todas las sociedades científicas involucradas en el manejo del paciente adulto y pediátrico/neonatal con IRA.

Para ello se contactó con las diferentes sociedades implicadas, quienes designaron a su vez a una serie de profesionales con suficiente experiencia en su aplicación. Se realizaron una serie de reuniones presenciales para tratar de alcanzar el consenso y, finalmente, se procedió a votación telemática de cada una de las recomendaciones (un total de 71), que se fundamentaron en una revisión de la literatura y actualización de la evidencia disponible en relación con tres categorías; indicaciones, monitorización y seguimiento. Para la clasificación del grado de acuerdo se optó por un sistema analógico de clasificación fácil e intuitivo de usar y que expresara con claridad si el procedimiento relacionado con el SRNI debía hacerse, podía hacerse o no debía hacerse.

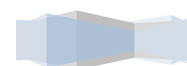

## Abstract

Non-invasive respiratory support (SRNI) comprises two treatment modalities, non-invasive mechanical ventilation (VMNI) and high-flow nasal cannula therapy (TAFCN) that are applied in adult, pediatric and neonatal patients with acute respiratory failure (ARF). However, the degree of agreement between the different specialties on the benefit of these techniques in different clinical settings is controversial. The objective of this consensus was to develop a series of good clinical practice recommendations for the application of non-invasive support in patients with ARF, endorsed by all the scientific societies involved in the management of the adult and pediatric / neonatal patient with ARF.

The different societies involved were contacted, who designed some professionals with sufficient expertise in their application. A series of face-to-face meetings were held to try to reach consensus and, finally, a telematic vote was organized for each of the recommendations (up to 71), which were based on a review of the literature and updating of the available evidence in relation to three categories; indications, monitoring and follow-up. For the classification of the level of agreement, an analogical classification system was chosen. The system is easy and intuitive to use and clearly states whether the procedure related to the SRNI should be done, could be done or should not be done.

# 1. Introducción

La ventilación mecánica no invasiva (VMNI) es una modalidad de soporte respiratorio que conlleva la aplicación de una presión positiva en la vía aérea de pacientes con insuficiencia respiratoria de diferentes etiologías mediante el uso de una interfase diferente del tubo orotraqueal o la traqueostomía. La VMNI, es hoy en día una estrategia terapéutica utilizada en la práctica clínica diaria en muchos entornos clínicos, en especial en aquellos pacientes con IRA en el ambiente hospitalario [1]. Desde los primeros estudios pioneros a finales de la década de 1980 sobre el uso de la VMNI en pacientes con enfermedades neuromusculares, apnea del sueño o en las Unidades de Cuidados Intensivos (UCI) [2–4], se ha generado un extenso cuerpo de investigación clínica explorando diferentes aplicaciones, modalidades, interfaces y comparaciones con otras terapias [4,5]. En general, los objetivos de la aplicación de la VMNI en el paciente con IRA son: a) evitar la intubación orotraqueal y sus complicaciones; b) mantener los beneficios de la ventilación a presión positiva y el apoyo parcial en el intercambio de gases y en el trabajo respiratorio.

La eficacia de la VMNI ha sido evaluada en el contexto de las condiciones clínicas comunes en la atención del paciente agudo con insuficiencia respiratoria aguda (IRA), tanto adulto como pediátrico o neonatal; entre estas patologías cabe destacar el edema agudo pulmonar cardiogénico (EAPc), la exacerbación de la enfermedad pulmonar obstructiva crónica (EPOC) [6–9], el soporte ventilatorio para pacientes con fracaso ventilatorio y en la prevención del fracaso de la extubación [9–12].

Sin embargo, aunque se trata de una técnica extensamente estudiada, algunos aspectos siguen siendo controvertidos, como su papel en la insuficiencia respiratoria hipoxémica "de novo", la selección de la interfase y modalidades ventilatorias para optimizar la interacción paciente-ventilador, la comodidad y los efectos secundarios (p. Ej., fugas, asincronías) [13–18]. En pediatría, la indicación más frecuente de VMNI, son las infecciones, especialmente las víricas, causantes de bronquiolitis en los pacientes

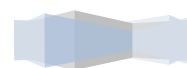

## Documento Español de Consenso sobre la utilización del Soporte Respiratorio No Invasivo en el paciente con Insuficiencia Respiratoria Aguda grave

en edad pediátrica menores de dos años y crisis de broncoespasmo graves en el niño en edad preescolar, escolar y el adolescente. Las infecciones suponen un riesgo especialmente importante en los pacientes en edad pediátrica con afecciones neuromusculares, malformaciones de la caja torácica y asma [19]. En neonatología su uso se ha generalizado en todas las patologías respiratorias, principalmente durante la prematuridad debido al síndrome de distrés respiratorio por déficit de surfactante. En los últimos años se ha generalizado asimismo el uso de una nueva modalidad de soporte respiratorio no invasivo, la terapia de alto flujo con cánulas nasales (TAFCN) que permite proporcionar flujos de hasta 60 litros por minuto de mezcla de gas humidificado y acondicionado térmicamente [20].

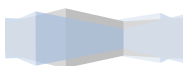

## 2. Justificación

Este documento de consenso surge de la necesidad de revisar y actualizar la práctica clínica sobre el empleo del soporte respiratorio no invasivo (SRNI), VMNI y TAFCN, en el paciente con IRA, tanto adulto, pediátrico como neonatal. Hasta la fecha no existe ningún documento que recoja la práctica clínica de la aplicación del SRNI en el Sistema Nacional de Salud Español. Por lo tanto, resulta necesario emitir un conjunto de recomendaciones sobre la aplicación de la VMNI y TAFCN mediante un acuerdo consensuado y una coordinación entre las principales sociedades científicas españolas implicadas en el manejo de los pacientes con IRA en el ámbito hospitalario (Sociedad Española de Neumología y Cirugía Torácica [SEPAR], Sociedad Española de Medicina Intensiva Crítica y Unidades Coronarias [SEMICYUC], Sociedad Española Medicina de Urgencias y Emergencias [SEMES]; Sociedad Española de Cuidados Intensivos Pediátricos [SECIP] la Sociedad Española de Neonatología [SENeo], Sociedad Española de Neumología Pediátrica [SENP] y la Sociedad Española de Anestesiología y Reanimación [SEDAR]).

El objetivo de este documento es proporcionar unas recomendaciones basadas en la mejor evidencia disponible y consensuadas por los profesionales sobre la aplicación de SRNI en la IRA, tanto en el paciente adulto como pediátrico/neonatal.

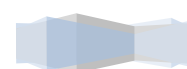

### 3. Métodos

Se conformó un Comité Coordinador (CC), desde la Sociedad Española de Neumología y Cirugía Torácica (SEPAR) y Sociedad Española de Medicina Intensiva, Crítica y Unidades Coronarias (SEMICYUC) en diciembre 2017 y se creó un grupo de trabajo (GT) constituido por representantes de la mayoría de las sociedades científicas que participan en el proceso asistencial del enfermo con insuficiencia respiratoria aguda con necesidad de soporte respiratorio (tabla 1) que supervisaron la calidad e idoneidad de los procesos y la metodología de consenso, así como la identificación del marco temático de los contenidos a validar. Este grupo de trabajo compuesto por veinticuatro expertos, previamente seleccionados por sus respectivas sociedades en base a su experiencia en la materia, se encargó de elaborar las recomendaciones de buena práctica clínica tras revisar y sintetizar la mejor evidencia disponible y formular recomendaciones y sugerencias de práctica clínica estructuradas en tres fases del proceso asistencial: indicaciones, monitorización y seguimiento. Asimismo, se contó con una serie de colaboradores que actuaron como revisores externos de las diferentes sociedades.

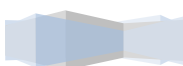



# Documento Español de Consenso sobre la utilización del Soporte Respiratorio No Invasivo en el paciente con Insuficiencia Respiratoria Aguda grave

| Sociedad científica                                                               | Panel de colaboradores                                                                                                                            |
|-----------------------------------------------------------------------------------|---------------------------------------------------------------------------------------------------------------------------------------------------|
| Sociedad Española de Anestesiología, Reanimación y Terapéutica del Dolor (SEDAR)  | Javier García, Antonio Romero, Rafael Uña, Carlos Ferrando                                                                                        |
| Sociedad Española de Pediatría/Cuidados Intensivos Pediátricos (SECIP)            | Alberto García-Salido, Mirella Gaboli, Julio Parrilla.                                                                                            |
| Sociedad Española de Medicina de Urgencias y Emergencias (SEMES)                  | César Cinesi Gómez, José Manuel Carratalá Perales, Joaquín Escámez                                                                                |
| Sociedad Española de Medicina Intensiva, Crítica y Unidades Coronarias (SEMICYUC) | Óscar Peñuelas, Gemma Rialp, Arantxa Mas, Gonzalo Hernández.                                                                                      |
| Sociedad Española de Neonatología (SENeo)                                         | Ana Sánchez, Julio Moreno, Ana Concheiro.                                                                                                         |
| Sociedad Española de Neumología y Cirugía Torácica (SEPAR)                        | Carlos Egea, Manel Luján, Miquel Ferrer, Sarah Heili, Eva Farrero, Juan F. Masa, Mónica González, M <sup>a</sup> Angeles Sánchez, Mirella Gaboli. |
| Sociedad Española de Neumología Pediátrica                                        | Mirella Gaboli                                                                                                                                    |
| Soporte metodológico                                                              | Iñaki Gutiérrez Ibarluzea                                                                                                                         |

*Tabla 1. Sociedades científicas y representantes que han participado y certifican el documento de consenso (por orden alfabético).*

## 3.1. Definiciones

La IRA se caracteriza por una presión parcial de oxígeno en sangre arterial (PaO<sub>2</sub>) menor de 60 mm Hg, respirando aire ambiente a nivel del mar (fracción inspiratoria de oxígeno (FiO<sub>2</sub>) de 0,21) y de aparición reciente [21]. Sin embargo, el concepto de IRA grave no está bien establecido. Los criterios más utilizados en los estudios clínicos en adultos son una frecuencia respiratoria (FR) mayor de 20 o 25 respiraciones/min (a destacar que en pediatría y neonatos, la FR fisiológica está íntimamente ligada a la edad y los valores anteriormente destacado pueden ser perfectamente fisiológicos), signos clínicos de trabajo respiratorio (uso de musculatura accesoria, patrón respiratorio de disociación toraco-abdominal, diaforesis, cianosis) o

hipoxemia moderada-grave, comúnmente definida con una relación  $\text{PaO}_2/\text{FiO}_2$  inferior a 200 mm Hg [22–24].

La IRA en el adulto engloba dos cuadros sindrómicos bien diferenciados. El primero es la IRA *de novo* que incluye pacientes hipoxémicos sin enfermedad pulmonar crónica subyacente o edema pulmonar cardiogénico, donde la hipercapnia es poco común. La causa principal de IRA *de novo* es la neumonía que supone aproximadamente el 75% de los casos [20]. El segundo es la insuficiencia respiratoria aguda hipercápnica, que incluye pacientes con  $\text{PaCO}_2$  que exceden los 45 mm Hg con  $\text{pH} < 7.35$  y se presenta principalmente en pacientes EPOC durante la exacerbación de la misma [22]. Las neumonías y las infecciones respiratorias con todas sus causas microbiológicas son las causas más frecuentes en el paciente pediátrico, seguido de las exacerbaciones de las patologías pulmonares, siendo el asma la más frecuente. A destacar también otras entidades como secuelas de reflujo gastroesofágico, malformaciones de la caja torácica y secuelas de prematuridad, entre otras.

### 3.2. Estrategia de búsqueda

Se realizó una búsqueda en las bases de datos PubMed/Medline, y Cochrane database of systematic Reviews y en el Metabuscador generalista Google Scholar. La estrategia de búsqueda incluyó artículos originales (ensayos clínicos experimentales y cuasi-experimentales, estudios observacionales prospectivos), guías de práctica clínica, revisiones sistemáticas, documentos de consenso de expertos, excluyéndose estudios experimentales, estudios de fisiología aplicada, estudios retrospectivos o series de casos publicados desde enero 1990 hasta abril de 2020. Conceptualmente, la búsqueda se dividió en dos ramas: la VMNI y la TAFCN.

Para la búsqueda de la rama de VMNI se utilizaron como palabras claves: Noninvasive ventilation (Medical Subject Headings (MeSH)), Positive-pressure Respiration (MeSH), NIV (texto libre) y Acute Respiratory Failure (texto libre). Para la rama de TNAF la búsqueda incluyó: high flow nasal (texto libre), high flow nasal

# Documento Español de Consenso sobre la utilización del Soporte Respiratorio No Invasivo en el paciente con Insuficiencia Respiratoria Aguda grave

therapy (texto libre), high flow nasal oxygen (texto libre), high flow nasal cannula (texto libre), high-flow y Acute Respiratory Failure (texto libre). Estos términos se combinaron luego usando operadores booleanos para depurar la búsqueda y filtros específicos de tipos de estudios en el caso de PubMed/Medline. Se excluyeron los estudios no realizados en humanos, los que no tuvieran abstract y los escritos en idioma distinto de inglés o español. Se descartaron los artículos duplicados o que se encontraban en la rama paralela. La lista de referencias inicial fue depurada mediante la lectura del título o el abstract obteniendo los artículos elegibles por dos personas de manera independiente y resueltas las disensiones por una tercera (Figura 1).

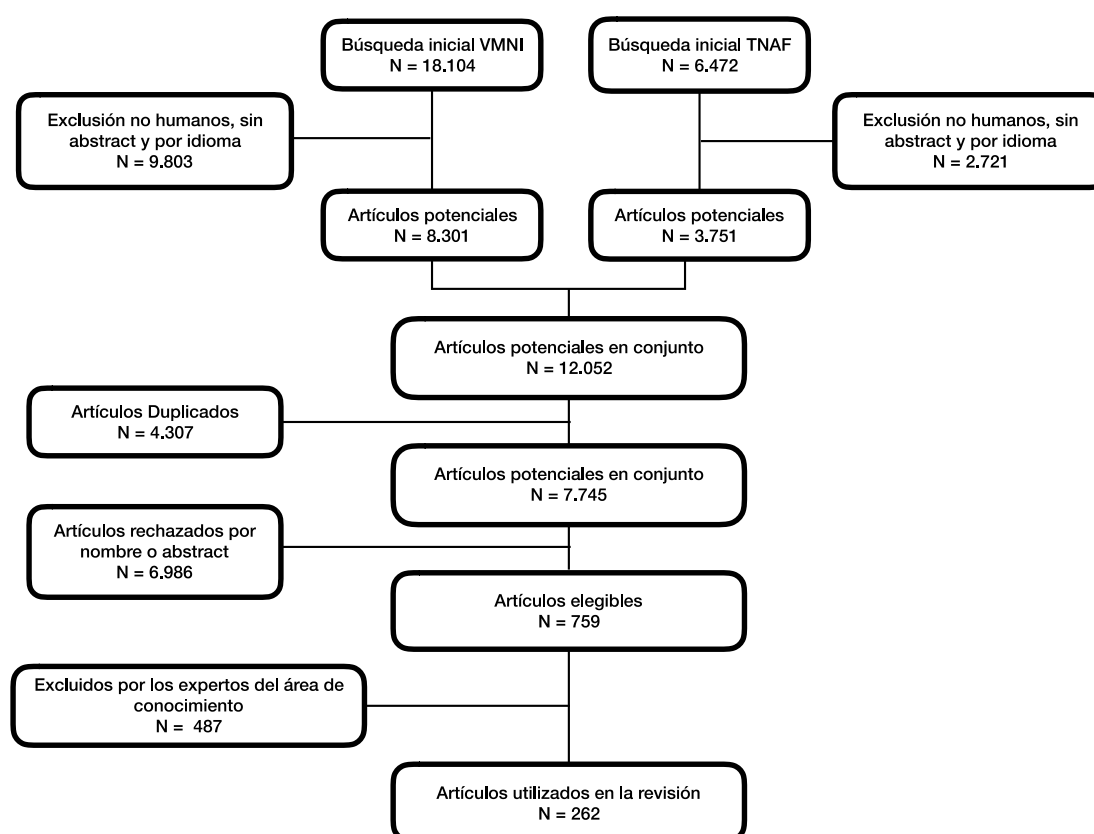

Figura 1. Diagrama de flujo de la revisión bibliográfica.

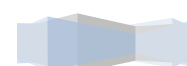

### 3.3. Estrategia de acuerdo

En el marco del este grupo de trabajo multidisciplinar se realizaron tres reuniones presenciales en las sedes de la SEPAR y SEMICYUC (Madrid, 19 de enero 2018, 10 de mayo 2018, 20 marzo 2019) en la que participaron tanto el CC como el GT. En estas reuniones las recomendaciones de buena práctica clínica fueron valoradas y discutidas utilizando una metodología participativa y democrática y un sistema de consenso por mayoría cualificada. Las discrepancias entre los miembros del GT fueron solventadas con soporte en la bibliografía disponible atendiendo a la evidencia de más alta calidad disponible para cada recomendación seleccionada; en caso de ausencia de información soportada en evidencia de calidad y en los que los participantes consideraron la necesidad de elaborar una recomendación de buena práctica clínica, ésta se sustentó en el consenso mayoritario de los expertos.

Posteriormente se procedió a la revisión del documento y delimitación de las recomendaciones y sugerencias de buena práctica clínica formuladas por el grupo de trabajo, diferenciando las relacionadas a los y las pacientes en edad adulta y otra para las relativas al paciente en edad pediátrica/neonatal. Para las recomendaciones o sugerencias se empleó una escala analógica de “símbolos (pulmones) de colores”. La gran amplitud de puntos a consensuar hizo optar al grupo por este sistema en lugar del tradicional basado en preguntas PICO, como se ha utilizado por ejemplo en las recientes guías ERS/ATS.

Seguidamente, las sugerencias de práctica clínica fueron sometidas a un proceso de validación externa (revisión), constituido por un comité de expertos independientes formado por dos representantes de cada sociedad científica participante que mostró el grado de acuerdo o desacuerdo con el panel de recomendaciones de buena práctica clínica elaborado en el documento mediante el uso de la misma metodología de escala analógica. El grupo elaborador respondió a cada una de las sugerencias recibidas de manera formal para llegar a la elaboración del documento final. Para definir el grado de acuerdo se procedió a votaciones telemáticas una vez definidos los puntos clave. Los grupos de votación se definieron por el perfil

## Documento Español de Consenso sobre la utilización del Soporte Respiratorio No Invasivo en el paciente con Insuficiencia Respiratoria Aguda grave

etario del paciente (adulto, pediátrico y neonatal), de forma que cada especialista únicamente podía emitir su voto en el grupo previamente asignado conforme a su experiencia. En las tablas del documento se expresa la opinión mayoritaria, siendo necesario un consenso de más del 50 % de miembros para emitir la recomendación o sugerencia correspondiente. En caso de igualdad entre dos de las opciones (puede o debe hacerse) se han reflejado las dos en el documento.

Finalmente, el informe redactado fue sometido a una nueva ronda de validación por parte del CC y del GT, que revisaron tanto el texto como las recomendaciones de buena práctica clínica formuladas.

Las recomendaciones de consenso (sugerencias de práctica clínica) se basaron cuando esto era posible en evidencias de calidad, derivadas de los datos publicados disponibles. En caso contrario, se recurrió al consenso tácito donde los datos no estaban disponibles. Sin embargo, por factibilidad no se realizó un análisis sistemático de la calidad de la evidencia, utilizando fuentes reconocidas de alta calidad y baja tasa de sesgos como la aproximación a la calidad más realista y maximizando la utilidad práctica sobre la base de nuestro sistema nacional de salud, para que la misma no pudiera verse comprometida. Por lo tanto, se optó por un sistema analógico de clasificación más fácil e intuitivo de usar que debería permitir a los profesionales sanitarios contrastar fácilmente el estado actual de la mejor evidencia disponible y la consiguiente orientación con las sugerencias de práctica clínica emitidas en el documento [25].

Por lo tanto, y siguiendo las prácticas del grupo GRADE (<http://www.gradeworkinggroup.org>), un símbolo verde indica una recomendación de consenso "debería hacerse": tratamiento o procedimiento indicado que se basa en al menos un ensayo aleatorio, o está respaldado por evidencia observacional sólida de que es beneficioso y efectivo. Un "pulmón amarillo" indica acuerdo general y / o evidencia científica a favor de un "puede hacerse" esta declaración o la utilidad / eficacia de un tratamiento o procedimiento. Esta se basa en ensayos clínicos realizados con un número pequeño de pacientes o resultados que quizás no sean ampliamente aplicables a todos los pacientes con dichas características. Por último, las estrategias



Documento Español de Consenso sobre la utilización del Soporte Respiratorio No Invasivo en el paciente con Insuficiencia Respiratoria Aguda grave

de manejo para las cuales existe evidencia científica de daño potencial o mala praxis y que por lo tanto no deben ser promovidas (“no hacer”) están indicadas por un pulmón rojo (Tabla 2).

| Definiciones relacionadas con un tratamiento o procedimiento                                                                                                                                                                                | Instrucción de declaración de consenso | Símbolo                                                                              |
|---------------------------------------------------------------------------------------------------------------------------------------------------------------------------------------------------------------------------------------------|----------------------------------------|--------------------------------------------------------------------------------------|
| Evidencia científica de que un tratamiento o procedimiento es beneficioso y efectivo. Requiere al menos un ensayo aleatorio o está respaldado por evidencia observacional sólida y el consenso de los autores (como lo indica un asterisco) | Debería hacerse                        |   |
| El acuerdo general y / o la evidencia científica favorecen la utilidad / eficacia de un tratamiento o procedimiento. Puede ser apoyado por ensayos aleatorios basados en un pequeño número de pacientes o que no sea ampliamente aplicable  | Puede hacerse                          |   |
| Evidencia científica o acuerdo general para no usar o recomendar un tratamiento o procedimiento                                                                                                                                             | NO hacerse                             |  |

Tabla 2. Razonamiento científico de las definiciones basadas en “Pulmones de colores” para las sugerencias de práctica clínica.

Esta clasificación para nuestro documento de consenso no debe considerarse literalmente similar a la utilizada para las recomendaciones de otras sociedades que aplican una clasificación de niveles de evidencia (I-III) y un nivel de recomendación (A, B y C) o a las recomendaciones según metodología GRADE [26], aunque si concuerdan con las prácticas de este último sobre la práctica de un ejercicio complejo y participativo de consenso, sino que pretenden transmitir un mensaje clínico operativo y fácil de interpretar para todos los profesionales involucrados en el manejo clínico de los y las pacientes en edad adulta o pediátrica/neonatal con insuficiencia respiratoria aguda.

## PRIMERA PARTE:

¿A quién debe indicarse el soporte  
respiratorio no invasivo?

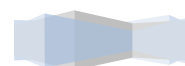

## 4. Indicaciones de la VMNI

### 4.1. Pacientes en edad adulta con necesidad de soporte urgente previo a la obtención de un diagnóstico de certeza

Tanto la VMNI como la TAFCN son medidas de SRNI utilizadas en el tratamiento de la insuficiencia respiratoria aguda grave con la finalidad de evitar la intubación endotraqueal. En determinadas situaciones y en diversos ámbitos no siempre es posible obtener un diagnóstico de certeza antes de la indicación de SRNI.

Ante un paciente con disnea y signos de IRA grave de causa desconocida, el uso de soporte respiratorio (principalmente VMNI por la falta de experiencia en TAFCN en este contexto clínico) puede permitir ganar el tiempo necesario para recabar información imprescindible acerca del diagnóstico causal, pronóstico, estado basal del paciente o adecuación del esfuerzo terapéutico.

Se trata de una cohorte de pacientes sobre la que hay poca experiencia en la literatura. Existe información limitada tanto acerca del porcentaje de pacientes atendidos en esta situación como de las características clínicas que llevan a la indicación de VMNI, más si se tiene en cuenta que a menudo no se dispone del resultado de exploraciones complementarias y se toma la decisión en base a la “sensación de gravedad” del cuadro clínico.

No existen estudios controlados que comparen esta práctica con la intubación traqueal directa, ya que estos pacientes no están representados habitualmente en los mismos. Sin embargo, a pesar de la falta de evidencia, algunos autores apuntan a que la VMNI no empeoraría el pronóstico de los pacientes con IRA grave [24].

A nivel orientativo, y teniendo en cuenta lo anteriormente expuesto, los criterios para el inicio de soporte ventilatorio serían los siguientes [22,27]:

- Criterios clínicos:
  - Disnea moderada-grave, con signos de trabajo respiratorio, uso de musculatura accesoria o movimiento abdominal paradójico



Documento Español de Consenso sobre la utilización del Soporte Respiratorio No Invasivo en el paciente con Insuficiencia Respiratoria Aguda grave

- Taquipnea.
- Valoración gasométrica, en caso de disponer de ella::
  - Necesidad de  $\text{FiO}_2$  superior a 0,4 para conseguir adecuada oxigenación (88-92 % en pacientes con riesgo de hipercapnia y superior al 92 % en el resto de los pacientes).
  - Fallo ventilatorio agudo ( $\text{pH} < 7,35$  con  $\text{PaCO}_2 > 45$  mm Hg).

Ante la presencia de los anteriores criterios clínicos, se puede iniciar VMNI, siempre y cuando no existan contraindicaciones o indicación de intubación urgente (Figura 2 y tabla 3). Posteriormente y con la mayor celeridad posible debe continuarse con la evaluación diagnóstica que permita identificar el diagnóstico y el pronóstico de la enfermedad causante de la IRA [28,29].

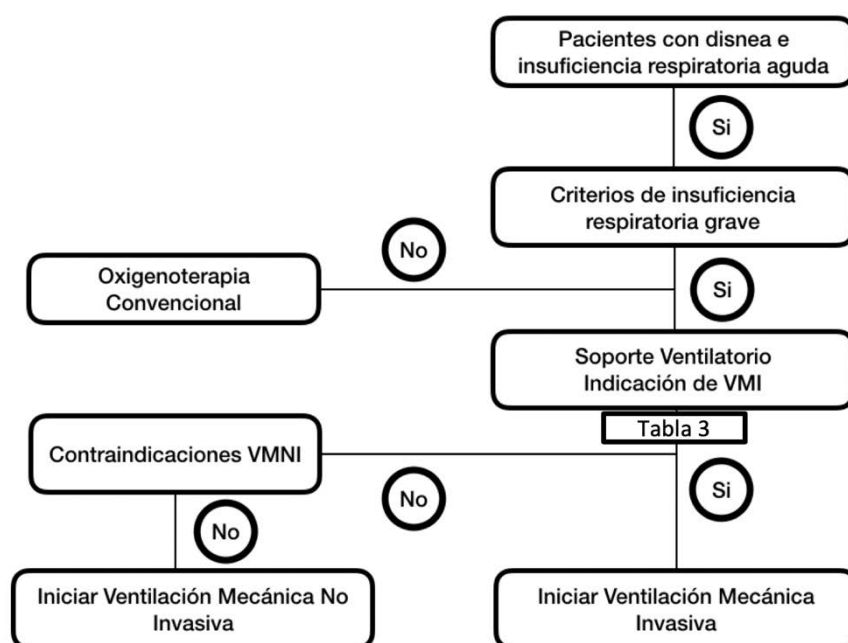

Figura 2. Algoritmo de decisión de soporte ventilatorio en paciente sin diagnóstico de certeza.



|                                                                                                                                         |
|-----------------------------------------------------------------------------------------------------------------------------------------|
| Paro respiratorio o cardiaco                                                                                                            |
| Pausas respiratorias o frecuencia cardíaca < 50 lat/min con pérdida de estado de alerta o dificultad para respirar con signos de boqueo |
| Agitación incontrolable                                                                                                                 |
| Evidencia de agotamiento, como la contracción activa de los músculos accesorios con un movimiento paradójico torácico-abdominal         |
| Aspiración masiva o incapacidad para manejar adecuadamente las secreciones respiratorias                                                |
| Inestabilidad hemodinámica sin respuesta a líquidos y agentes vasoactivos                                                               |

Tabla 3. Indicaciones de manejo invasivo de la vía aérea de forma emergente.

4.2. Indicación de VMNI en el paciente en edad adulta con diagnóstico de certeza

Una vez se disponga de las exploraciones complementarias necesarias para realizar una aproximación diagnóstica, se valorará la necesidad de iniciar la VMNI o se decidirá sobre su continuidad en caso de haberse iniciado antes del diagnóstico.

4.2.1. Enfermedad pulmonar obstructiva crónica (EPOC) agudizada

En la agudización de la EPOC se produce un aumento de la carga mecánica debido a las elevadas resistencias al flujo aéreo y a la hiperinsuflación dinámica, que derivan en fatiga muscular y acidosis respiratoria. La ventilación con presión positiva reduce el trabajo respiratorio y aumenta la ventilación alveolar, produciendo una disminución tanto de la frecuencia respiratoria como del atrapamiento aéreo. Por otro lado, el aumento del volumen minuto permite corregir la acidosis respiratoria, y la aplicación de una presión positiva al final de la espiración (PEEP) externa compensa el esfuerzo inspiratorio necesario para superar la PEEP intrínseca [30].

La utilización de VMNI en pacientes con agudización hipercápnica de la EPOC se generalizó en los años 90 tras la publicación de los primeros estudios controlados. Estos demostraron que la aplicación de VMNI se asociaba a una reducción en la tasa de intubación y en la mortalidad comparada con el tratamiento médico convencional [31–34].

En el año 2003 se realizó la primera revisión sistemática Cochrane de los estudios de alta calidad publicados hasta entonces en la aplicación de VMNI en pacientes con exacerbación de la EPOC y acidosis respiratoria comparándolo con el tratamiento médico convencional [35]. En ella se concluyó que, seleccionando pacientes con acidosis respiratoria, el beneficio era claro, existiendo una disminución significativa de la frecuencia respiratoria y mejoría en la acidosis hipercápnica al cabo de una hora de tratamiento, una reducción en la tasa de intubaciones (riesgo relativo 0,42) y disminución significativa de la mortalidad (riesgo relativo 0,41). Numerosos estudios y revisiones realizados con posterioridad al año 2000 han permitido corroborar la mejoría clínica y pronóstica de estos pacientes, siempre y cuando la aplicación de la VMNI se haga en condiciones adecuadas, incluso fuera de las unidades de cuidados intensivos (salas de hospitalización, servicios de Urgencias etc). Así, se describe que el uso de VMNI en pacientes EPOC con pH inferiores a 7,35 y  $\text{PaCO}_2 > 45$  mm Hg reduce el riesgo de intubación entre un 18% y un 28%, la estancia hospitalaria entre 2 y 5 días y la mortalidad un 10-13% respecto el tratamiento médico estándar [36–39]. El beneficio en las agudizaciones que cursan sin acidosis respiratoria, por el contrario, no ha sido establecido [40,41].

Existen pocos estudios comparando el uso de VMNI respecto a la intubación y ventilación mecánica invasiva en aquellos pacientes que se presentan con agudizaciones graves y criterios de soporte ventilatorio inmediato. Excluyendo los pacientes en situación de riesgo vital, la aplicación de VMNI en lugar de ventilación mecánica invasiva (VMI) puede reducir en más de un 40% la necesidad de VM, aunque no se ha evidenciado impacto en el pronóstico de estos enfermos [42,43].

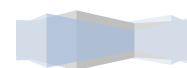

#### 4.2.2. Edema agudo de pulmón cardiogénico (EAPc)

La aplicación de presión positiva en la vía aérea en pacientes con EAPc provoca efectos hemodinámicos y respiratorios importantes, como disminución de la precarga del ventrículo derecho, de la poscarga del ventrículo izquierdo, aumento de la contractilidad y el gasto cardíaco, reclutamiento alveolar, reducción del shunt pulmonar, aumento de la distensibilidad pulmonar y disminución del trabajo respiratorio. Todo ello lleva a una mejora de la disnea, la oxigenación y disminución de la frecuencia respiratoria a los 30 minutos de su inicio [30].

Múltiples estudios han demostrado la superioridad de la presión continua en la vía aérea (CPAP) y la VMNI respecto la oxigenoterapia convencional en el tratamiento del EAPc, en términos de reducción del número de intubaciones (hasta un 22%) [44–46].

Los primeros estudios controlados que evaluaron la utilidad del soporte no invasivo en el EAPc datan de los años 80, y compararon la eficacia de la utilización de CPAP frente a la terapia convencional con oxígeno (TCO), demostrando una mejoría clínica más rápida y una disminución en el número de intubaciones en la rama de CPAP [45,47].

El primer estudio aleatorizado y controlado que valoró el uso de VMNI con presión de soporte obtuvo resultados parecidos [47], y varios metaanálisis posteriores concluyen que ambas técnicas (CPAP y presión de soporte) reducen la tasa de intubaciones y tienden a reducir la mortalidad respecto a TCO (reducción significativa con CPAP) [47,48].

Sin embargo, en el año 2008 se publicó el estudio 3-CPO que incluyó un gran número de pacientes con edema agudo de pulmón y acidosis respiratoria. El objetivo fue comparar la mortalidad entre los pacientes que recibían CPAP, presión de soporte o TCO. En el mismo no se detectaron diferencias significativas en mortalidad, aunque sí mejoraron más rápidamente los pacientes que recibían algún tipo de soporte respiratorio [49]. Existen diferencias de diseño entre los estudios incluidos en los metaanálisis previos y el 3-CPO que pueden justificar estas discrepancias. Aún así,

metaanálisis posteriores que lo incluyen siguen mostrando que ambas técnicas (CPAP y presión de soporte) reducen la tasa de intubaciones, y que la aplicación de la CPAP en pacientes con EAPc se acompaña también de una reducción en la mortalidad [44].

Respecto la comparación de las dos modalidades, CPAP o VMNI, no existen datos que avalen la superioridad de una respecto la otra en cuanto a la evolución, aunque los pacientes tratados con VMNI parecen mejorar algunas variables clínicas de forma más rápida [50–52].

#### 4.2.3. Descompensaciones respiratorias de pacientes con Síndrome de Hipoventilación Obesidad (SHO)

Los pacientes con SHO presentan a menudo exacerbaciones que cursan con hipercapnia y acidosis respiratoria. El uso de VMNI en estos casos, de forma análoga a la exacerbación de la EPOC, se asoció a mejoría clínica y gasométrica [53]. Sin embargo, la evidencia disponible es aún insuficiente para emitir una recomendación firme y sustancial por lo que únicamente se sugiere el uso de VMNI en pacientes con descompensación de SHO y presencia de acidosis respiratoria.

#### 4.2.4. VMNI en situación paliativa

EL uso de la VMNI en situación paliativa debe diferenciarse del uso de la VMNI como techo terapéutico en aquellas patologías donde está indicado su uso (ver apartado 4.2.7). En pacientes con IRA de diferentes etiologías el uso de la VMNI puede conducir a un alivio sintomático y/o a prolongar la vida unas horas que pueden ser esenciales para el paciente y/o la familia [54]. Su utilización ha demostrado mejorar la disnea y disminuir los requerimientos de cloruro mórfico [55] y debe valorarse como una oportunidad de mejorar la disnea mientras el resto de tratamiento paliativo surte efecto, definiendo objetivos a corto plazo y evitando tanto generar expectativas a paciente y familia como prolongar el proceso de muerte [56,57]. Debe tenerse en



cuenta la dificultad de generar evidencia de alta calidad en este campo [41], quizá la experiencia en condiciones de vida real pueda ser una alternativa, pero el profesional clínico debe conocer que existe la posibilidad de administrar VMNI como tratamiento coadyuvante para la disnea en pacientes paliativos.

#### 4.2.5. Agudización grave del asma (AGA)

No existe evidencia de calidad respecto a la mejora pronóstica del uso de VMNI en pacientes con AGA [58]. Sin embargo, es posible, individualizando en cada situación, y en condiciones de muy estrecha vigilancia de la respuesta (idealmente en entorno de UCI) una prueba corta de la VMNI en dichos pacientes

#### 4.2.6. Insuficiencia respiratoria hipoxémica *de novo*

El porcentaje de intubación en pacientes con insuficiencia respiratoria hipoxémica *de novo* que reciben VMNI es especialmente alto, oscilando entre el 30 y el 60%. Debe tenerse en cuenta que entre 10 y el 15% de los pacientes con insuficiencia respiratoria aguda *de novo* reciben VMNI [59–61] y en un reciente estudio observacional internacional que incluyó a 2.813 pacientes con distrés respiratorio agudo (SDRA), los tratados inicialmente con VMNI (15%) e hipoxemia grave ( $\text{PaO}_2/\text{FiO}_2 < 150$  mm Hg) presentaron mayor mortalidad que los ventilados de forma invasiva [61]. No obstante, y dado que se trata de un cuadro que puede deberse a diversas entidades clínicas, merece realizarse un análisis por separado:

#### *Neumonía en no inmunodeprimidos:*

30

El uso de la VMNI en pacientes previamente sanos con neumonía comunitaria grave presenta un alto porcentaje de fracaso y puede retrasar la decisión de la

intubación orotraqueal y aumentar la mortalidad [62]. La excepción la constituyen los pacientes EPOC con agudización secundaria a neumonía, que presentan mejor pronóstico [63].

En un estudio prospectivo reciente que incluyó 3.971 pacientes hospitalizados con diagnóstico de neumonía y tratados con VMNI (27.9%) o invasiva (VMI) se objetivó una mortalidad hospitalaria del 15,8%, 29,8% y 25,9% entre los pacientes tratados con VMNI inicial, VMI inicial y fracaso de la VMNI respectivamente [64]. Cabe destacar sin embargo que en el grupo de pacientes tratados inicialmente con VMNI la comorbilidad cardiorespiratoria previa era más frecuente y la mortalidad fue menor en los pacientes tratados con VMNI con dicha comorbilidad.

En un estudio retrospectivo (2010-2011) de beneficiarios de Medicare que incluyó 2757 pacientes mayores de 64 años ingresados por neumonía que recibieron ventilación mecánica, se observó que el 19% recibieron VMNI, sin evidenciarse diferencias en la mortalidad a los 30 días en comparación con los que recibieron VMI, además de asociarse a un gasto médico significativamente más bajo [65].

A la luz de los estudios, se puede recomendar una prueba de VMNI en pacientes con comorbilidad cardiorespiratoria y neumonía mientras que no es aconsejable en pacientes sin dicha comorbilidad dada la baja calidad y controversia de la evidencia.

### *IRA en inmunodeprimidos*

Aunque diversos estudios apoyaron el uso de la VMNI para el tratamiento de la IRA leve a moderada en pacientes seleccionados con inmunodepresión de diversas etiologías, los beneficios clínicos no se confirmaron en un gran ensayo clínico posterior [66]. Por otra parte, en un análisis *post hoc* de otra cohorte, que incluyó 82 pacientes críticos inmunocomprometidos con IRA hipoxémica, los dos factores asociados independientemente a la intubación endotraqueal y la mortalidad fueron la edad y el

uso de VMNI como terapia de primera línea [67]. Se apunta, a pesar de la ausencia de diferencias en el último ensayo clínico [68], que la TAFCN pueda ser una mejor estrategia no invasiva para estos pacientes (ver apartado correspondiente a TAFCN), aunque la VMNI siga siendo una estrategia común para estos pacientes.

De cara al futuro, se requieren estudios para evaluar cuál es la mejor estrategia (sesiones de VMNI intercaladas con TCO-TAFCN o tratamiento únicamente con TAFCN). En una reciente revisión sistemática acerca del uso de la TAFCN en pacientes inmunodeprimidos que incluyó siete estudios con 667 pacientes, el uso de alto flujo se asoció significativamente con una reducción en la mortalidad y en la tasa de intubación sin incrementar la duración de la estancia en la UCI [69]. Sin embargo, se necesitan más ensayos controlados aleatorios que permitan la confirmación de estos hallazgos y la incorporación a la práctica clínica como recomendación [70]. Por tanto, y a falta de estudios comparativos de mejor calidad con TAFCN, la VMNI precoz puede ser una alternativa a considerar en pacientes con inmunosupresión e IRA.

### *Insuficiencia respiratoria aguda hipoxémica secundaria a SDRA*

Diferentes estudios y meta-análisis han mostrado un impacto negativo del uso de VMNI en pacientes con SDRA en el contexto de fallo de otros órganos, y no se ha demostrado superior a la TAFCN en estos pacientes [20,71]. Solamente un estudio piloto en pacientes con SDRA leve ( $\text{PaO}_2/\text{FiO}_2 > 200$  y  $\leq 300$ ) mostró disminución de la intubación y reducción de los niveles de citoquinas con el uso de VMNI, aunque estos resultados no han podido ser posteriormente confirmados [72]. Asimismo, existe una experiencia en un estudio unicéntrico que mostró tasas de intubación reducida en pacientes con SDR cuando se ventilaban con interfase tipo casco o helmet [73]. A pesar de ello, y por la escasa evidencia, no se puede recomendar el uso de la VMNI en la IRA hipoxémica grave secundaria a SDRA. La única excepción la constituiría el SDRA leve, tal y como se recoge en la llamada “definición de Berlín” [74]



#### 4.2.7. Pacientes con insuficiencia respiratoria aguda y órdenes de no intubar

La aplicación de la VMNI como techo terapéutico para el tratamiento de la IRA en pacientes con órdenes de no intubar ha sido ampliamente evaluada. Un reciente metanálisis que incluye 27 estudios con un total de 2.020 pacientes con órdenes de no intubación [75]; en dicho estudio, la supervivencia al alta hospitalaria fue del 56% al año en la rama VMNI y 32% en la rama de tratamiento convencional, sin diferencias en la calidad de vida de los supervivientes. Además, estos pacientes se pueden beneficiar de un manejo precoz en unidades de intensivos o intermedios, con mayor experiencia en el manejo de la terapia [76]. En cualquier caso, las cuestiones clínicas relacionadas con la calidad de vida en los supervivientes, el grado de invasión o futilidad en los no supervivientes y el impacto de la VMNI en pacientes con órdenes solamente de medidas de confort no parecen haber sido aún suficientemente evaluadas, por lo que se sugiere el uso de VMNI en pacientes con indicación de limitación terapéutica para intubación y ventilación invasiva si pertenecen a alguno de los grupos anteriores en los que se documenta eficacia de la VMNI, siempre y cuando, además, mejore la sensación de disnea durante el procedimiento.

#### 4.2.8. Enfermedades neuromusculares

Se trata de la principal causa de descompensación en dicho tipo de pacientes [77]. En el contexto de enfermedad neuromuscular aguda (crisis miasténica, síndrome de Guillain-Barré), especialmente con afectación bulbar, la VMNI debe usarse con precaución y con seguimiento y evaluación especialmente estrecha de la respuesta al tratamiento [78]. En caso de exacerbación de cualquier causa (por ejemplo infección intercurrente) en pacientes con insuficiencia respiratoria crónica secundaria a patología neuromuscular y de caja torácica, se recomienda el soporte con VMNI para prevenir y tratar la acidosis respiratoria aunque la evidencia de la mejoría pronóstica es menor que en los casos de EPOC.



#### 4.2.9. Traumatismo torácico

En pacientes con traumatismo torácico e hipoxemia secundaria a contusión pulmonar se puede tratar mediante VMNI una vez descartados neumotórax no drenado o fístula broncopleural para prevenir o tratar la aparición de IRA hipoxémica [79]. De acuerdo con las pautas de la British Thoracic Society, la Canadian Critical Care Trials Group/Canadian Critical Care Society y más recientemente las conjuntas de la European Respiratory Society y la American Thoracic Society las indicaciones y la eficacia de la VMNI en la dificultad respiratoria inducida por un traumatismo han sido hasta ahora inconsistentes y simplemente han recibido una recomendación de bajo grado [41,80,81]. El papel que en esta indicación puede tener la TAFCN es todavía desconocido. En un ensayo clínico en adultos con IRA hipoxémica ( $\text{PaO}_2/\text{FiO}_2 < 200$  mm Hg) con trauma torácico los pacientes se aleatorizaron a recibir tratamiento con TAFCN o VMNI [82]. Los hallazgos del estudio mostraron que la puntuación de APACHE fue mayor en el grupo de VMNI. El estudio se suspendió tempranamente debido a una diferencia significativa en la tasa de intubación (menor en el grupo VMNI)., A falta de estudios de mayor calidad, se sugiere el uso de VMNI en pacientes con IRA y traumatismo torácico en ausencia de neumotórax no drenado.

#### 4.2.10. VMNI en *weaning* y extubación

Cabe distinguir tres escenarios diferentes en este apartado, la aplicación de VMNI para facilitar el *weaning* y la extubación, el tratamiento de la IRA post extubación, y por último la aplicación profiláctica de la VMNI post extubación para evitar su fracaso.

34

En el primer escenario, una reciente revisión realizada para evaluar si el uso de la VMNI facilita la extubación, incluyó 16 ensayos de calidad moderada a buena, con 994 participantes, la mayoría de ellos con EPOC [83]. En comparación con la

desconexión desde modalidad controlada, la VMNI disminuyó significativamente la mortalidad, especialmente en los ensayos que incluyeron exclusivamente participantes con EPOC (RR 0,36). Sin embargo, este efecto no se reprodujo en otro tipo de pacientes más heterogéneos. Además, la VMNI redujo significativamente otros desenlaces clínicos secundarios como el fracaso de la desconexión, la duración de la estancia en UCI y en el hospital, pero con un grado de heterogeneidad significativa. Los análisis de subgrupos sugieren que los beneficios para la mortalidad fueron significativamente mayores en los ensayos que incluyeron exclusivamente participantes con EPOC en comparación con poblaciones mixtas.

Por otro lado, es importante diferenciar la aplicación de la VMNI en pacientes ventilados mecánicamente como estrategia de desconexión entre aquellos que toleraron la prueba de ventilación espontánea (PRE) pero presentan algún factor de riesgo para el fracaso de la extubación (tabla 4), frente a aquellos pacientes en los que se aplica la VMNI como estrategia de desconexión y han presentado un fracaso de la PRE. En este sentido, en aquellos pacientes en fase de desconexión de la ventilación mecánica, con fracaso de la PRE, el uso de la VMNI no se asoció con diferencias en la evolución de los pacientes (mortalidad inferior, duración de soporte ventilatorio, reintubación o traqueotomía), comparado con una estrategia convencional de desconexión [84,85].

|                                                                                             |
|---------------------------------------------------------------------------------------------|
| Edad > 65 años                                                                              |
| Insuficiencia cardíaca como causa de la IRA                                                 |
| APACHE II > 12 en el momento de la extubación                                               |
| Descompensación de la EPOC                                                                  |
| Neumopatía crónica con aparición de hipercapnia durante la prueba de respiración espontánea |
| Más de uno de los siguientes:                                                               |
| Fallo de 2 tests de respiración espontánea consecutivos                                     |

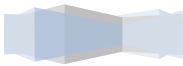

Documento Español de Consenso sobre la utilización del Soporte Respiratorio No Invasivo en el paciente con Insuficiencia Respiratoria Aguda grave

|                                                     |
|-----------------------------------------------------|
| Insuficiencia cardíaca crónica                      |
| PaCO <sub>2</sub> > 45 mmH después de la extubación |
| Múltiples comorbilidades                            |
| Tos débil o estridor postextubación                 |

Tabla 4. Factores de riesgo de fracaso de extubación

En cuanto a la estrategia preventiva en el fracaso de extubación, la literatura sugiere que la VMNI profiláctica después de la extubación puede ser útil para prevenir la insuficiencia respiratoria aguda en poblaciones seleccionadas [86–88]. El impacto de la VMNI profiláctica añadida a la TAFCN ha sido evaluado recientemente en un ensayo clínico multicéntrico con asignación aleatoria que incluyó 691 enfermos con riesgo alto de fracaso de la extubación en la UCI. En el grupo de pacientes en los que se aplicó la VMNI inmediatamente después de la extubación además de TAFCN se objetivó un descenso del número de reintubaciones en comparación con la rama a la que se aplicó únicamente TAFCN [89]. Sin embargo, en el caso del empleo de la VMNI empleada para tratar la insuficiencia respiratoria aguda post-extubación no tiene un beneficio clínico [90] e incluso puede aumentar la mortalidad retrasando la reintubación [91], por lo que se desaconseja su uso.

Probablemente, la excepción a esta regla la constituyen aquellos pacientes que desarrollan insuficiencia respiratoria en el postoperatorio de cirugía mayor electiva abdominal [92] o resección pulmonar [93]. En un ensayo clínico multicéntrico [94] que incluyó 293 pacientes que se sometieron a cirugía abdominal electiva o urgente y desarrollaron insuficiencia respiratoria hipoxémica dentro de la primera semana postoperatoria, el uso de la VMNI redujo significativamente la reintubación (33,1% en el grupo VMNI comparado con 45,5% en el grupo de TCO) aunque no se obtuvieron diferencias significativas en la mortalidad a los 90 días (14,9% en el grupo VMNI comparado con 21,5% en el grupo de terapia de oxígeno estándar). La aplicación de la VMNI resultó segura dado que no hubo diferencias significativas entre los dos grupos en la incidencia de eventos adversos graves, por lo que se considera que la aplicación

de VMNI en comparación con la terapia de oxígeno estándar reduce significativamente el riesgo de reintubación, sin producir eventos adversos. Estos hallazgos apoyan el uso de la VMNI en este contexto [95].

En resumen, en los enfermos que toleran una PRE y presentan factores de riesgo de fracaso de la extubación, especialmente en enfermos con reagudización de EPOC, una estrategia de aplicación de VMNI postextubación reduce el fracaso de la misma (incluso combinada con TAFCN). Sin embargo, en poblaciones más heterogéneas la VMNI no puede recomendarse como estrategia de desconexión de la ventilación mecánica [96]. EN cuanto a la IRA post extubación, por regla general debería tratarse con VMI.

#### 4.2.11. VMNI en cuadros de pandemias virales

El uso de la VMNI para el síndrome respiratorio agudo grave (SARS) y otras pandemias virales es controvertido, con tasas de fracaso de la VMNI alrededor del 30% [97], aunque sin evidencia de propagación viral a los cuidadores que tomaron las precauciones adecuadas. Más recientemente, la VMNI también se usó en pacientes con IRA por Gripe A H1N1, con tasas de fracaso que oscilaron entre el 13% y el 77% [98–100]. Asimismo, ha sido ampliamente utilizada en la reciente pandemia SARS-Cov2, si bien es necesario evaluar aún los resultados de su aplicación, a pesar de que se han efectuado recomendaciones específicas acerca de sus indicaciones y modo de uso [101].

A pesar de la incertidumbre de la evidencia y la ausencia de ensayos clínicos aleatorizados, los datos positivos de la mayoría de los estudios observacionales sugieren que se puede plantear su utilización en pacientes cuidadosamente seleccionados en centros con experiencia y en un ambiente protegido (habitaciones con presión negativa).



#### 4.2.12. Insuficiencia respiratoria aguda postoperatoria

La función respiratoria se ve comprometida con facilidad en el periodo postoperatorio, con riesgo de formación de atelectasias y disfunción diafragmática. La principal indicación de la VMNI en el período perioperatorio es la hipoventilación que se presenta durante la recuperación de la anestesia o por fármacos opiáceos y sedantes. Además, puede verse empeorada por fenómenos obstructivos de la vía aérea superior por hipotonía de los músculos orofaríngeos [102]. Los pacientes con trastornos respiratorios del sueño, SHO y trastornos neuromusculares conocidos previamente a la intervención son especialmente sensibles a estos fenómenos adversos.

Tanto la CPAP como la VMNI mejoran la función respiratoria en el periodo perioperatorio previniendo el fallo respiratorio agudo. En un estudio de 830 pacientes sometidos a cirugía cardiotorácica programada con riesgo de insuficiencia respiratoria, se realizó un ensayo clínico aleatorizado comparando TAFCN frente a VMNI después de la extubación, evidenciándose que el uso de TAFCN en comparación con VMNI no se asoció con una tasa más alta de fracaso del tratamiento ni incremento de la mortalidad [103].

En una revisión sistemática sobre seguridad de la técnica que incluyó 2 estudios y 269 enfermos se indica que la utilización de la CPAP o VMNI son intervenciones seguras a corto plazo en pacientes con cirugía abdominal alta, aunque sin encontrar diferencias en cuanto a la mortalidad y la duración de la estancia hospitalaria. No hubo datos suficientes a más largo plazo acerca de los potenciales efectos adversos relativos en las complicaciones asociadas a las anastomosis quirúrgicas [95]. Otros estudios en pacientes durante el perioperatorio de cirugía bariátrica tampoco demuestran incremento en las dehiscencias de sutura por el efecto de la presión positiva [104]. De la misma forma, no se ha evidenciado aumento de prevalencia de fuga anastomótica traqueobronquial en 5 estudios aleatorizados, con 292 pacientes sometidos a cirugía torácica y que recibieron VMNI [105]. Por tanto, y como se ha especificado ya anteriormente, se sugiere la utilidad de la VMNI en la IRA postoperatoria abdominal y

cardiorrónica, sin efectos adversos significativos a nivel de las anastomosis quirúrgicas.

#### 4.3. Indicaciones de VMNI en el paciente en edad pediátrica

##### 4.3.1. IRA global (hipoxemia con hipercapnia) y prevención a la reintubación

En el paciente pediátrico en situación de IRA global, el uso de VMNI ha demostrado ser un método eficaz para mejorar la oxigenación, el pH, disminuir la  $\text{PaCO}_2$  y la necesidad de ventilación mecánica invasiva [106]. Asimismo, se recomienda de forma precoz el uso de VMNI junto con un asistente de tos en pacientes con enfermedades neuromusculares (ENM), especialmente en los pacientes pediátricos con hipotonía marcada [107] a fin de evitar la intubación. Existe también experiencia en el mismo perfil de pacientes en situación de post extubación, asociándose a una disminución de la tasa de reintubación y a menor tiempo de permanencia en las Unidades de Cuidados Intensivos Pediátricos (UCIP). Por tanto, su uso debe recomendarse para pacientes con ENM y alto riesgo de insuficiencia respiratoria postextubación [108]. De forma análoga, dicha combinación aplicada como modo de entrenamiento preoperatorio, mejora el resultado respiratorio postoperatorio de los pacientes en edad pediátrica programados para cirugía de escoliosis, disminuyendo tiempo de ventilación mecánica y de permanencia en UCIP [109]. Basado en estas observaciones, se puede sugerir el uso de la VMNI para evitar la reintubación en cualquier situación que comporte alto riesgo de fallo en el destete (especialmente ENM) y en cualquier paciente en edad pediátrica con IRA hipoxémica e hipercapnica, siempre que no existan contraindicaciones para la VMNI [109,110].

##### 4.3.2. IRA hipoxémica sin hipercapnia

Se ha empleado la VMNI en pacientes en edad pediátrica con insuficiencia respiratoria aguda hipoxémica sin hipercapnia, con cociente saturación de

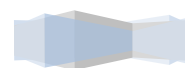

oxígeno/fracción inspiratoria de oxígeno ( $\text{SaO}_2/\text{FiO}_2$ ) entre 160 y 270 (o  $\text{PaO}_2/\text{FiO}_2$  entre 175 y 300) y ausencia de fallo multiorgánico [111,112]. En un estudio en pacientes pediátricos con IRA hipoxémica, la presencia de distrés respiratorio fue predictor de fracaso precoz de la VMNI [111], así como el número de fallos orgánicos [112].

En situación de IRA asociada a patologías que cursan con inmunodeficiencia primaria o secundaria, la VMNI se ha empleado como soporte respiratorio de primera línea para evitar la intubación endotraqueal, demostrándose una reducción del riesgo de neumonía asociada a la ventilación mecánica y una mejora en el pronóstico en el distrés de causa extrapulmonar [113].

En un estudio específico de VMNI en pacientes con neumonía e IRA hipoxémica la tasa de intubaciones en neumonía fue sensiblemente inferior a la de los pacientes con distrés respiratorio (17 vs 50%) [111]. También el uso de la CPAP en pacientes en edad pediátrica con neumonía e hipoxemia ha demostrado disminuir la mortalidad en países con recursos económicos limitados [114,115].

El uso de VMNI para la IRA moderada o grave asociada a infecciones víricas, especialmente en la bronquiolitis viral aguda en el paciente en edad temprana, ha demostrado ser de utilidad en un porcentaje muy elevado de casos. Su uso mejora la hipoxemia, mejorando el intercambio gaseoso, estabiliza el colapso dinámico de la vía aérea y alivia la fatiga muscular, permitiendo disminuir el uso de ventilación mecánica invasiva, que actualmente queda casi exclusivamente indicada en los casos con distrés respiratorio asociado a la vírica y riesgo alto de contagio por secreciones (brotes epidémicos graves con microorganismos especialmente virulentos). En esta patología, en los últimos años la TAFCN está utilizándose como una alternativa a la VMNI, pero de momento la eficacia de la VMNI en la bronquiolitis aguda sigue siendo superior y con mejor relación coste efectividad [116–118].

Como resumen, se sugiere el uso de VMNI en pacientes con IRA no hipercápnica moderada, sin distrés respiratorio y sin fallos orgánicos asociados. También ha demostrado utilidad en pacientes inmunodeprimidos con IRA y en



pacientes con IRA moderada o grave asociada a infecciones víricas (principalmente bronquiolitis viral).

#### 4.3.3. Pacientes en edad pediátrica con IRA en el contexto de crisis asmática grave

Se ha empleado la VMNI a fin de disminuir la fatiga muscular, mejorar el intercambio gaseoso, contrarrestar la PEEP intrínseca, demostrando eficacia tanto en ensayos clínicos como en estudios observacionales [119–121] traducándose en una baja tasa de necesidad de intubación en estos pacientes. Por el contrario, actualmente no hay evidencia suficiente para recomendar la terapia de alto flujo en pacientes en edad pediátrica con status asmático [122].

#### 4.3.4. Miscelánea

Se trata de situaciones clínicas poco frecuentes en las cuales se ha documentado el uso de VMNI, aunque sin el soporte de estudios observacionales con muestras de suficiente envergadura.

- Síndrome torácico agudo por drepanocitosis: la VMNI ha demostrado mejorar la oxigenación alveolar, disminuir la hipoventilación alveolar y disminuir tanto el número de transfusiones como de exanguino-transfusión [123].
- Edema agudo de pulmón cardiogénico: la VMNI ha demostrado eficacia y seguridad tanto antes como después de la cirugía cardíaca, aunque su fracaso se suele asociar a secuelas pulmonares secundarias a enfermedad cardíaca [124].
- Exacerbaciones respiratorias en pacientes portadores de VM domiciliaria: la VMNI está indicada durante el transporte a un centro hospitalario, preferiblemente con una interfase buconasal o facial total y con un reajuste de la programación [78,125].



## Documento Español de Consenso sobre la utilización del Soporte Respiratorio No Invasivo en el paciente con Insuficiencia Respiratoria Aguda grave

- Obstrucción dinámica aguda de la vía aérea superior: A pesar de la escasez de literatura sobre el uso de VMNI para estabilizar de la vía aérea superior en situación aguda, su uso es extendido en la práctica clínica y se ha asociado a una significativa disminución del esfuerzo respiratorio y mejora del intercambio gaseoso [126,127].
- Pacientes en edad pediátrica con disnea y/o IRA en situación de "cuidados de los últimos días de la vida" y sin indicación a ventilación mecánica invasiva: como medida de confort [128].

Así pues, como resumen, se recomienda el uso precoz de VMNI en pacientes en edad pediátrica con enfermedades que cursen con IRA global y como prevención del fracaso de extubación, especialmente en pacientes con ENM. En las situaciones de IRA hipoxémica se recomienda una prueba con VMNI (CPAP o presión soporte) durante una-dos horas con vigilancia estrecha del cociente  $\text{SaO}_2/\text{FiO}_2$  o  $\text{PaO}_2/\text{FiO}_2$ , teniendo en cuenta los criterios de fracaso anteriormente descritos. La misma aproximación sería válida para los pacientes con AGA. Finalmente, en IRA por infección respiratoria, especialmente en la bronquiolitis viral aguda en los pacientes en edades tempranas, la VMNI debe considerarse una medida de soporte adecuada en cualquier ámbito, desde el transporte sanitario hasta los propios servicios hospitalarios.

### 4.4. Indicaciones de VMNI en neonatología

En los últimos años se ha generalizado el uso de la VMNI en todas las patologías respiratorias neonatales con insuficiencia respiratoria leve-moderada con el objetivo de tratar de evitar la intubación endotraqueal y ventilación mecánica invasiva [129]

Las principales situaciones en las que existe experiencia son las siguientes:

42

#### 4.4.1. Estabilización inicial tras el nacimiento

Especialmente en situaciones de prematuridades extremas, dado que, a mayor inmadurez, mayor incidencia de apnea y/o bradicardia tras el nacimiento (< 32 semanas de EG y/o < 1500 gramos de peso) .

#### 4.4.2. Síndrome de Distrés Respiratorio (patología propia del prematuro por déficit de surfactante)

Debe ser iniciada la VMNI en todos los pacientes de riesgo de forma profiláctica (< 30 semanas de EG ) que no hayan requerido intubación inicialmente[130]. Si los requerimientos de FiO<sub>2</sub> son superiores al 30% en pretérminos el tratamiento precoz debe acompañarse de administración de surfactante intratraqueal

#### 4.4.3. Prevención de IRA tras la extubación

En prematuros de menos de 30 semanas de EG con síndrome de Distrés Respiratorio, el uso de la VMNI reduce la incidencia de reintubación tras el destete de ventilación mecánica convencional y extubación [131]. En el resto de las edades gestacionales se realiza tras valoración individualizada.

#### 4.4.4. Otras patologías respiratorias neonatales

Se ha empleado la VMNI en las apneas de la prematuridad, la enfermedad pulmonar restrictiva (displasia broncopulmonar), síndrome de aspiración meconial, edema pulmonar, alteraciones de la vía respiratoria (laringomalacia, traqueomalacia), y parálisis diafragmática.

#### 4.4.5. Causas extrarrespiratorias



## Documento Español de Consenso sobre la utilización del Soporte Respiratorio No Invasivo en el paciente con Insuficiencia Respiratoria Aguda grave

En el caso del ductus arterioso persistente del prematuro y en general, en las cardiopatías congénitas con hiperaflujo pulmonar se ha empleado la VMNI como medida para su disminución [132]. También en neonatos con ENM o del SNC que cursen con hipoventilación estaría indicado su uso.

## 5. Indicaciones de la terapia de alto flujo con cánulas nasales

### 5.1. Indicaciones de la TAFCN en adultos

#### 5.1.1. IRA en neumonía y síndrome de distrés respiratorio agudo

Frente a la falta de evidencia para el uso de la VMNI en estas indicaciones, según las guías de práctica clínica de la ERS/ATS [41] se mantiene la TCO como estándar de tratamiento. La TAFCN se ha postulado como alternativa de tratamiento, pero los estudios que analizan su empleo suelen incluir un *case-mix* de pacientes con diversas etiologías como causa del fracaso respiratorio [20,133]. Además, los protocolos de aplicación de la TAFCN publicados son muy variables, por lo que una vez más es muy difícil analizar de forma conjunta los resultados. No obstante, metaanálisis recientes han encontrado resultados significativos mediante estratificación de los estudios [134]. Uno de los principales estudios en IRA hipoxémica [20] reclutó 310 pacientes en tres grupos, uno con TAFCN, otro con VMNI y un tercero con oxigenoterapia convencional. Si bien el resultado para el objetivo primario (tasa de intubación) fue negativo, la mortalidad y el número de días libres de ventilación mecánica fueron significativamente menores en el grupo tratado con TAFCN. En el estudio de subgrupos, los autores encontraron una reducción significativa de la tasa de intubación en los pacientes con hipoxemia más grave ( $\text{PaO}_2/\text{FiO}_2 < 200$ ). Es importante tener en cuenta que este estudio excluye pacientes con otros fallos orgánicos añadidos al respiratorio. Otro estudio en el entorno de Urgencias y Emergencias con 303 pacientes incluidos [133] demostró que la necesidad de soporte ventilatorio en las primeras 24 horas de evolución de la insuficiencia respiratoria fue significativamente menor con TAFCN.



Así pues, para pacientes con neumonía grave y/o SDRA, se recomienda la TAFCN como primera técnica de soporte respiratorio frente a oxigenoterapia y VMNI en pacientes sin indicación directa de intubación orotraqueal.

### 5.1.2. IRA en inmunodeprimidos

La evidencia para el uso de TAFCN en este grupo de pacientes es limitada. El único ensayo clínico que analiza su empleo frente a oxigenoterapia convencional [135] aplica la TAFCN durante períodos muy cortos, de 2 horas, con lo que las conclusiones obtenidas sobre objetivos clínicos como intubación o mortalidad deben ser interpretadas con mucha cautela. Incluso objetivos secundarios como el confort, no obtienen resultados significativos. Existen dos estudios de análisis de subgrupos de ensayos clínicos previos: uno de ellos en pacientes reclutados para un ensayo clínico que randomizaba VMNI y oxigenoterapia convencional, en el cual la TAFCN se aplica en ambos grupos según la decisión del clínico asistencial [66], que no obtuvo resultados favorables para la TAFCN. El segundo [67] analiza los pacientes inmunosuprimidos reclutados en el ensayo original FLORALI [20] y demuestra, en los 82 pacientes incluidos, que la mejor opción terapéutica para estos pacientes es la TAFCN frente a oxigenoterapia convencional y VMNI, que es la que presenta mayor mortalidad. Una limitación importante de estos estudios es que incluyen poblaciones mixtas con diversas causas de inmunosupresión.

Por tanto, y a falta de más datos que avalen o no la superioridad frente a TCO, la TAFCN puede emplearse en pacientes con IRA e inmunosupresión.

### 5.1.5. Prevención de fracaso respiratorio y reintubación tras la extubación

Existen diversos estudios que han incidido en el uso de la TAFCN para el fracaso de extubación con diseños diferentes. En este sentido destacan varios estudios que comparan la TAFCN frente a la TCO. En uno de ellos, se observó una disminución del

riesgo de reintubación con el uso de TAFCN en pacientes con  $\text{PaO}_2/\text{FiO}_2 \leq 300$  mm Hg [136], si bien cabe destacar que la reintubación era un objetivo secundario del estudio. Por otro lado en otro estudio [137], no se alcanzaron resultados concluyentes en la tasa de reintubación al comparar TAFCN frente a TCO en pacientes de alto riesgo de reintubación y sin hipercapnia, ya los autores no pudieron reclutar el tamaño muestral previsto. En pacientes con bajo riesgo de fracaso de extubación se documentó, en un estudio controlado, una reducción significativa de la tasa de reintubación en el grupo de pacientes a los que se aplicaba la TAFCN comparado con el grupo tratado con TCO [138]. Se considera que aunque se han publicado diversos metaanálisis, no existe ningún estudio específico respecto al riesgo de reintubación, por lo que no se pueden generar recomendaciones definitivas de TAFCN frente a TCO.

En cuanto al uso de TAFCN tras la extubación, un estudio controlado de no inferioridad [139] en pacientes de alto riesgo de fracaso no hipercápnicos confirmó la no inferioridad de TAFCN respecto a la VMNI en este grupo heterogéneo de pacientes, observándose una reducción de la tasa de insuficiencia respiratoria tras la extubación en la rama de TAFCN, explicado por la mejor tolerancia de la técnica que permitía aplicar el protocolo de forma estricta. Finalmente, los recientes resultados del estudio mencionado anteriormente en pacientes de alto riesgo (especialmente en situación de hipercapnia) apoyan su uso en combinación con la VMNI, que consigue las tasas menores de reintubación [89]

Por último, en el grupo de pacientes extubados tras un proceso quirúrgico, los estudios varían según la cirugía realizada, siendo las más estudiadas la cirugía abdominal y la cardiotorácica. Así, el OPERA trial [140] analiza la prevención de hipoxemia con TAFCN en pacientes postoperados de cirugía mayor abdominal con riesgo moderado/alto de complicaciones respiratorias postoperatorias, no observándose beneficios de la TAFCN frente a TCO.

En el caso de cirugía cardiotorácica, se han publicado varios estudios. El BiPOP trial [103] con un diseño de no inferioridad con un margen del 9% de TAFCN frente a VMNI, y un objetivo primario combinado, incluyó 830 pacientes con insuficiencia respiratoria postoperatoria o con alto riesgo de reintubación, confirmando la no



inferioridad de la TAFCN frente a VMNI en este grupo de pacientes. Otro estudio controlado [141] ha observado una menor necesidad de escalada terapéutica con el uso de TAFCN frente a TCO, aunque nuevamente en pacientes de bajo riesgo y con una tasa de reintubación muy inferior a las presentadas en el resto de estudios (0,6%), lo que limita la generalización de los resultados.

En definitiva y a modo de resumen:

- Puede valorarse el uso de TAFCN tras la extubación programada en pacientes sin hipercapnia y con bajo riesgo de reintubación.
- No puede recomendarse el uso rutinario y exclusivo de TAFCN para prevenir la reintubación en pacientes de alto riesgo tras extubación. Sin embargo, datos recientes apoyan su uso en combinación con la VMNI.
- Puede considerarse el uso de la TAFCN como alternativa terapéutica a la VMNI en pacientes postoperados de cirugía cardiotorácica con insuficiencia respiratoria postoperatoria o con alto riesgo de reintubación).

#### 5.1.6 Pre-oxigenación antes de la intubación

Hasta la fecha, se han analizado principalmente tres opciones de preoxigenación para la intubación orotraqueal: la TAFCN, la VMNI y la combinación de ambas. A diferencia de la TAFCN, la VMNI sólo se puede aplicar en la fase inicial en ventilación espontánea, mientras que la TAFCN se puede aplicar desde un principio, incluso en la fase anterior a la inducción anestésica, pudiéndose prolongar hasta la fase de apnea e incluso durante las maniobras de intubación. No se ha realizado ningún estudio comparativo entre VMNI y TAFCN durante la fase previa a la inducción de apnea. El estudio OPTINIV en pacientes hipoxémicos principalmente con neumonía y distrés respiratorio mostró que el añadir TAFCN a la VMNI se asoció a menor desaturación y mayor SpO<sub>2</sub> media durante la fase apneica [142]. Dicho parámetro ha demostrado ser fundamental a la hora de reducir los valores mínimos de oxigenación previos a la intubación [143]. Sólo un estudio controlado ha analizado la VMNI para esta indicación [144], y a pesar de los resultados positivos para su empleo, el diseño no



permite generar una recomendación de alta evidencia a su favor. Por otro lado, hay más estudios que analizan la TAFCN para esta misma indicación. En uno de ellos, que incluyó pacientes hipoxémicos en el momento de la intubación, no se objetivó mejoría en la oxigenación respecto al uso de TCO, aunque el tiempo hasta intubación fue mayor de 4 minutos en un gran porcentaje de los pacientes analizados [145]. Tampoco se encontró mejoría con TAFCN durante la fase de apnea en otro estudio con 150 pacientes [146]. En otro estudio que incluyó 40 pacientes con hipoxemia leve o moderada [147] no se encontraron diferencias frente a TCO. Factores que parecen influir de forma decisiva en estos resultados son la experiencia del personal que realiza la técnica, con desaparición de diferencias cuando los tiempos de intubación se reducen, el tipo de diseño de los estudios, el grado de hipoxemia previo al intento de intubación y la técnica de preoxigenación empleada [148].

En resumen, para pacientes hipoxémicos que van a ser intubados de forma programada, sugerimos el empleo de técnicas de preoxigenación con VMNI y/o TAFCN frente a la TCO con vistas a reducir el riesgo de hipoxemia peri-intubación. Las técnicas mixtas de VMNI más TAFCN deberían reservarse para pacientes severamente hipoxémicos y alto riesgo de desaturación precoz.

#### 5.1.7 Miscelánea

- IRA en bronoscopias y otras técnicas invasivas: la hipoxemia es un fenómeno común durante la broncoscopia que con frecuencia limita su indicación en pacientes con IRA de base. A pesar de que existe experiencia y evidencia sobre el uso de VMNI como alternativa a la oxigenación convencional en pacientes con riesgo elevado, empiezan a aparecer estudios con TAFCN haciendo énfasis principalmente en su seguridad, eficiencia, confort y tolerancia [149].
- Insuficiencia Cardíaca Aguda (ICA) / Edema agudo de pulmón: Se trata de un campo en el cual se recomienda el uso de presión positiva (VMNI/CPAP) con un alto nivel de evidencia. Sin embargo, existen también estudios en los cuales el



uso de TAFCN en pacientes con ICA moderada mejora de forma precoz la disnea, reduce la frecuencia respiratoria y mejora la oxigenación comparada con TCO [150]. No existen hasta la fecha estudios comparativos entre el uso de CPAP y TAFCN en pacientes con EAP. Es importante reseñar que, en las recientes recomendaciones de la Sociedad Europea de Cardiología sobre el tratamiento de la IRA secundaria a ICA con modos no invasivos, la TAFCN aparece como una opción terapéutica en pacientes con ICA moderada que no responden a TCO o en aquellos con indicación de VMNI e intolerancia a la misma [52].

- Insuficiencia respiratoria hipercápnica en EPOC: Al igual que en el EAP, en la agudización de la EPOC que cursa con acidosis respiratoria, la primera línea de tratamiento sigue siendo la VMNI. No obstante, recientemente se han publicado estudios fisiológicos y de seguridad alrededor del uso de TAFCN en pacientes con EPOC en situación de hipercapnia [151,152], documentándose en los pacientes incluidos un descenso en los valores de  $\text{PaCO}_2$  que puede permitir su uso combinado con la VMNI o como método de destete de la misma [152]. Queda por determinar en qué pacientes podría ser una alternativa real a la VMNI.
- Pacientes en situación paliativa: La TAFCN pueden ser una alternativa terapéutica para pacientes con orden de no intubación e IRA especialmente en caso de disnea refractaria o en intolerantes a la VMNI. El reto para el futuro será identificar los pacientes en situación paliativa u orden de no intubación que podrían ser tratados con TAFCN de inicio a fin de conseguir un mayor confort [153].

## 5.2. Indicaciones de TAFCN en el paciente en edad pediátrica

Como es sabido la TAFCN ha visto generalizado su aplicación en el ámbito pediátrico en los últimos años. Esto ha derivado en un uso extendido en caso de insuficiencia respiratoria. Dicha aplicación, en el momento actual, no siempre se sustenta en una evidencia consistente que además en muchos casos se encuentra aún en desarrollo

En el momento en el que se redacta este documento solo se puede afirmar, a la espera de demostrar su coste-efectividad [154] que la TAFCN podría tener un lugar intermedio entre el TCO y el tratamiento con VMNI/CPAP [118,155] . Se debe dejar claro que este abordaje es una terapia menos eficaz que la CPAP y por supuesto que la VMNI. Al tiempo su indicación debe individualizarse y nunca suponer un retraso para el inicio de CPAP, VMNI o VM. Esto es de especial importancia en situaciones de insuficiencia respiratoria moderada y grave.

En el caso de la bronquiolitis aguda la TAFCN no se puede recomendar en planta como terapia inicial para bronquiolitis leves-moderadas. Una revisión sistemática que incluye 9 estudios randomizados y controlados sugiere que la TAFCN es segura como terapia inicial en el manejo respiratorio de las bronquiolitis pero no existe evidencia de que sea beneficiosa en comparación a oxigenoterapia convencional o CPAP [156,157]

En el contexto de la planta, y como abordaje posterior a TCO, podría tener un papel en caso de hipoxemia leve y esfuerzo conservado con intención de evitar el escalamiento terapéutico (considerando el escalamiento cualquier medida terapéutica adicional como la aspiración de secreciones respiratorias) aunque no ha demostrado disminuir la probabilidad de incremento en el soporte respiratorio, ingreso en UCIP o intubación [158]. En el caso de que el uso de TAFCN se generalice para el tratamiento de las bronquiolitis en las plantas de hospitalización, este enfoque terapéutico podría determinar un incremento desproporcionado de los costes [154,159]. No hay trabajos en el momento actual que hayan comparado el uso en el contexto de las plantas de hospitalización pediátrica de CPAP frente a la TAFCN aunque la tolerancia de la TAFCN podría ser mejor con menor carga de trabajo de enfermería. En caso de insuficiencia



respiratoria grave e ingreso en UCIP la TAFCN no debe retrasar el inicio de CPAP o VMNI[158,160].

Finalmente, también existe controversia acerca de la posible utilidad de la TAFCN en pacientes pediátricos con asma. Los efectos beneficiosos del oxígeno humidificado y calentado no parecen ser suficientes para disminuir el trabajo respiratorio [122,161]. La TAFCN no ha demostrado ser superior al TCO en el manejo de la crisis asmática en urgencias de pediatría [162]. A su vez, no parece que la TAFCN por si misma pueda mejorar la eliminación de CO<sub>2</sub> en pacientes en edad pediátrica [163]. De este modo su uso en este grupo de pacientes solo se puede considerar si existe un nivel de conciencia normal y siempre asociado a un seguimiento muy estrecho. Al tiempo, y como se indicó antes, no debe retrasar en ningún caso el inicio de CPAP, VMNI o VM ni la administración de broncodilatadores.

### 5.3. Indicaciones en neonatología de la TAFCN

La TAFCN se utiliza en aquellas patologías respiratorias con insuficiencia respiratoria leve-moderada [164] Hay evidencia y consenso en el destete de la CPAPn y el destete ventilatorio para evitar la reintubación en el paciente pretérmino > 28 semanas de EG [165].

Los factores determinantes que han dado lugar a su uso han sido sus escasos efectos secundarios descritos, la mejora de la confortabilidad tanto del paciente como de la familia y la reducción significativa de las lesiones nasales en comparación con la VMNI.



## 6. Consideraciones específicas del uso de VMNI en entorno prehospitalario

En adultos atendidos en el ámbito prehospitalario, la valoración clínica es básica para la indicación e inicio de la VMNI. Actualmente existe suficiente evidencia que apoya el uso de VMNI, principalmente en el modo CPAP, de forma segura en sospecha de edema agudo de pulmón, ya que disminuye la tasa de intubación orotraqueal y la mortalidad [166–169]. Sin embargo, para realizar la técnica de forma segura es fundamental protocolizarla estrictamente, realizando una valoración clínica exhaustiva que incluya los principios del apartado 4.1. [170] y unos rigurosos criterios preestablecidos para la intubación endotraqueal, como los mostrados en la tabla 3 y siempre y cuando no exista techo terapéutico en este sentido [169].

Con respecto a otras patologías fuera del edema agudo de pulmón existe poca evidencia al respecto. En los pacientes con exacerbación de la EPOC se sugiere que podría ser utilizada la VMNI de forma segura.

En las situaciones de IRA en paciente en edad pediátrica sin alteración del nivel de conciencia, la VMNI en ámbito prehospitalario permite estabilizar al paciente y mejorar su condición durante el traslado. En especial, las IRA en el contexto de una bronquiolitis, de una crisis de asma o de una laringitis aguda suelen ser las situaciones que más se benefician de un uso precoz de la VMNI y dicha actuación se ha demostrada útil para disminuir la necesidad de intubación. En mucha de estas situaciones el uso de CPAP, de más fácil empleo en ámbito pre-hospitalario, ha demostrado ser suficiente y no inferior a la VMNI con dos niveles de presión. Por el contrario, no hay evidencia suficiente para recomendar el uso de terapia de alto flujo en las mismas condiciones [171–173]. Finalmente, en paciente con ENM y VMNI domiciliaria en caso de IRA el traslado se deberá realizar con por lo menos en mismo nivel de asistencia que utiliza regularmente en su domicilio.

## 7. Contraindicaciones del soporte respiratorio no invasivo

No existe un claro consenso sobre las contraindicaciones absolutas y relativas para el uso de la VMNI en adultos. Las contraindicaciones se fundamentan en dos puntos, por un lado, que la VMNI sea imposible usarla técnicamente, y por otro que los resultados de la VMNI no sean los adecuados para esa patología. Hay una serie de situaciones que impiden la aplicación de la VMNI y, en los cuales, es obligatoria la valoración de IOT (Tabla 5).

En el paciente en edad pediátrica, las contraindicaciones de la VMNI no son muy diferentes de las descritas en el adulto. Conviene subrayar aquellas situaciones en las cuales el uso de VMNI podría ensombrece el pronóstico del paciente, al retrasar la intubación endotraqueal y la ventilación mecánica convencional [174,175], como la parada cardiorrespiratoria, la necesidad de protección de la vía aérea, como en el coma o la hemorragia digestiva activa, la insuficiencia respiratoria grave con ausencia de esfuerzo respiratorio o con riesgo de agotamiento/parada respiratoria inminente, la inestabilidad hemodinámica, neumotórax no drenado, malformaciones que dificulten la colocación de la interfase, existencia de secreciones abundantes y finalmente los casos de insuficiencia respiratoria hipoxémica con cociente  $\text{SaO}_2/\text{FiO}_2$  inferior a 160 o con  $\text{PaO}_2/\text{FiO}_2$  inferior a 175 por el peor pronóstico documentado.

De la misma manera, en el neonato, la existencia de ciertas malformaciones faciales o nasales (como la atresia de coanas), haría técnicamente inviable la VMNI. En caso de riesgo de perforación intestinal (postoperatorio abdominal inmediato) es recomendable demorar su inicio o hacerlo con un soporte mínimo para evitar la distensión abdominal. De la misma forma, estaría contraindicado en la hernia diafragmática congénita antes de la cirugía correctora.

Por lo que se refiere a la TAFCN, siendo una terapia confortable y mejor tolerada que la VMNI, parece que hay una menor tasa de rechazo por falta de colaboración del paciente. Al ser una técnica reciente, aún no hay muchos estudios acerca de sus contraindicaciones.



Documento Español de Consenso sobre la utilización del Soporte Respiratorio No Invasivo en el paciente con Insuficiencia Respiratoria Aguda grave

**Absolutas**

- Paro cardiorespiratorio o apnea con indicación de IET
- Necesidad de inmediato aislamiento de la vía aérea
- Imposibilidad de adaptar ningún tipo de interfase a la cara del paciente, por trauma facial, o fenotipo facial atípico.
- Alta sospecha de obstrucción de la vía aérea superior
- Falta de control de las secreciones de la vía respiratoria (abundancia o tos ineficaz)
- Shock que no se consigue estabilizar con volumen o inotropos
- Hemoptisis o hematemesis amenazantes
- Coma (excepto en encefalopatía hipercápnica)
- Alta sospecha de neumotórax no drenado (Prioritario el drenaje del mismo)

**Relativas:**

- Vómito o epistaxis no controlable
- Cirugía de vía aérea superior o tracto digestivo superior recientes. Si bien se ha considerado tradicionalmente como contraindicación relativa, no existen estudios que lo avalen.
- Embarazo: no existe experiencia en la literatura en este terreno.
- Falta de material adecuado o capacitación técnica.

*Tabla 5. Contraindicaciones para la VMNI en el adulto.*



# SEGUNDA PARTE:

## ¿CÓMO REALIZAR EL SOPORTE RESPIRATORIO NO INVASIVO?



## 8. Estratificación de riesgo

Aquellos casos en los que el uso de VMNI/TAFCN puede plantearse, pero presentan un alto porcentaje de fracaso y que, por tanto, merecen mayor dedicación y medios, deben ser valorados ya de inicio por un especialista que disponga de un entorno con una adecuada monitorización y disponibilidad inmediata para iniciar medidas de soporte vital avanzado (Tabla 6). Del mismo modo, los casos iniciados fuera de las áreas mencionadas que no presenten mejoría en un tiempo prudencial (entre 1 y 3 horas a título orientativo) o en los que se prevé que se precise de VMNI un tiempo prolongado deberían ser tratados en el entorno mencionado.

| Bajo riesgo de fracaso de VMNI<br>Tratamiento con VMNI / TAFCN                                                                                                                                                                                                                                                             | Alto riesgo de fracaso de VMNI<br>Tratamiento con VMNI / TAFCN                                                                                                                                                                                                                                                             |
|----------------------------------------------------------------------------------------------------------------------------------------------------------------------------------------------------------------------------------------------------------------------------------------------------------------------------|----------------------------------------------------------------------------------------------------------------------------------------------------------------------------------------------------------------------------------------------------------------------------------------------------------------------------|
| En Urgencias / áreas de monitorización                                                                                                                                                                                                                                                                                     | En áreas de cuidados intensivos (UCIs)                                                                                                                                                                                                                                                                                     |
| <ul style="list-style-type: none"><li>• Exacerbación de la EPOC.</li><li>• Hipoventilación asociada a obesidad.</li><li>• Enfermedades restrictivas / neuromusculares.</li><li>• Edema agudo de pulmón cardiogénico.</li><li>• IRA hipoxémicos con limitación de tratamiento para ventilación mecánica invasiva.</li></ul> | <ul style="list-style-type: none"><li>• Fracaso de VMNI / TAFCN sin limitación de tratamiento con ventilación mecánica invasiva.</li><li>• Neumonía con criterios de gravedad en el inmunocompetente / inmunodeprimido.</li><li>• Traumatismo torácico.</li><li>• Síndrome de distrés respiratorio agudo (SDRA).</li></ul> |

*Tabla 6. Recomendaciones para la estratificación del riesgo de la VMNI en el paciente con insuficiencia respiratoria aguda en el hospital*

En pediatría la gravedad puede determinarse con la ayuda de algunos índices pronósticos que permiten determinar la gravedad de la IRA, como el “pulmonary score” o su versión modificada en el caso de asma que incluye la valoración de la saturación de oxígeno respirando aire ambiente [176], la escala de Taussig, usada para evaluar el estridor asociado a obstrucción de la vía respiratoria alta [177] o la escala Wood-Downes Ferrés para las bronquiolitis [178]. Así, tras una o dos horas de aplicación de la VMNI en una sala de urgencias, si no hay mejoría de los índices utilizados en la valoración inicial, debe considerarse que el riesgo de fracaso de la VMNI es alto y debe trasladarse el paciente a una UCIP para continuar el tratamiento en un ámbito más apropiado. En el caso de la IRA hipoxémica, los factores de riesgo de fracaso [111,179–181] son principalmente la edad (mayor riesgo a menor edad), la frecuencia respiratoria y cardíaca basal y a las 2 horas de tratamiento, las escalas genéricas de gravedad (como PELOD, PRISMIII, PIM1, PIM2), la hipercapnia, acidosis respiratoria y, especialmente, la gravedad de la hipoxemia (necesidad de  $FiO_2$  superiores a 0.6 a las 2 horas de inicio de la VMNI,  $PaO_2/FiO_2$  y/o  $SpO_2/FiO_2$  que no mejoran tras dos horas de VMNI, especialmente si se mantienen por debajo de 170 y 160 respectivamente).

Finalmente, la estratificación de los pacientes en neonatología no se aplica, dado que todos los pacientes neonatales con soporte respiratorio no invasivo se encuentran ingresados en las unidades de neonatología bajo monitorización estricta y cuidados médicos y de enfermería propios de estas unidades



## 9. Entorno físico y dotación de personal

### 9.1. Particularidades de la aplicación en medio prehospitalario

En general, es previsible más dificultad para la adaptación del paciente a la VMNI. Además de las dificultades inherentes a la técnica, debe extremarse el control de la reserva, consumo y fugas de gases, tanto de oxígeno como de aire medicinal, especialmente en Transporte Sanitario Aéreo (TSA) y en traslados terrestres de larga duración. Las averías mecánicas del medio de transporte, así como la meteorología pueden aumentar los tiempos de transporte y por tanto el consumo de gases y la aparición de complicaciones.

Además, y muy especialmente en el TSA, se incrementa la ansiedad y por tanto la aparición de complicaciones como el rechazo de la técnica. Finalmente, la expansión de gases en vuelo a cotas elevadas puede originar mayor distensión gástrica

### 9.2. Unidades hospitalarias de paciente adulto

Independientemente de su ubicación física, las características mínimas que debería reunir una unidad donde se ofreciera SRNI como tratamiento serían las especificadas en la tabla 7.

En cuanto a los recursos humanos, la formación, experiencia e implicación de los profesionales es casi más importante que la localización donde se realiza el SRNI ; una ratio adecuada médico-paciente (no superior a 1:6) , enfermería-paciente (no superior a 1:4) con monitorización mínima indispensable la 24 h incluida la noche puede ser un factor independiente de éxito de la terapia sea cual sea el lugar donde se realice [182,183].

Documento Español de Consenso sobre la utilización del Soporte Respiratorio No Invasivo en el paciente con Insuficiencia Respiratoria Aguda grave

| Obligatorias                                                                                                                                                                                                                                                                                                                                                                                                                                                                                                                                                                                                                                                                                                                                                                                                                                                                                                                                                                                                             | Recomendables                                                                                                                                                                                                                                                                                                                                                                                                   |
|--------------------------------------------------------------------------------------------------------------------------------------------------------------------------------------------------------------------------------------------------------------------------------------------------------------------------------------------------------------------------------------------------------------------------------------------------------------------------------------------------------------------------------------------------------------------------------------------------------------------------------------------------------------------------------------------------------------------------------------------------------------------------------------------------------------------------------------------------------------------------------------------------------------------------------------------------------------------------------------------------------------------------|-----------------------------------------------------------------------------------------------------------------------------------------------------------------------------------------------------------------------------------------------------------------------------------------------------------------------------------------------------------------------------------------------------------------|
| <ul style="list-style-type: none"> <li>- Presencia de personal sanitario capacitado y con experiencia tanto médico como de enfermería las 24 h del día.</li> <li>- Rápido acceso a intubación orotraqueal ( IOT).</li> <li>- Oximetría continua (SpO<sub>2</sub>).</li> <li>- Control protocolizado de frecuencia respiratoria (FR) , frecuencia cardíaca (FC) , presión arterial (PA) y temperatura.</li> <li>- Disponibilidad de ventiladores específicos para VMNI con autonomía para poder realizar transporte dentro del medio hospitalario adaptables a los diferentes fungibles y con monitorización de parámetros ventilatorios y dotación de alarmas. Idealmente, deberían disponer de monitorización mediante gráficos de flujo / tiempo y presión / tiempo.</li> <li>- Un mínimo de dos tipos diferentes de mascarillas para la posibilidad de rotación de interfases.</li> <li>- Mínimo un sistema de aerosolterapia adaptado al fungible.</li> <li>- Mínimo un sistema de humidificación activa.</li> </ul> | <ul style="list-style-type: none"> <li>- Control mediante telemetría.</li> <li>- Monitorización no invasiva de CO<sub>2</sub> transcutánea ( ptCO<sub>2</sub>)</li> <li>- Ratio enfermería/ paciente 1:3 – 1: 4 .</li> <li>- Posibilidad de realización de gasometría arterial in situ</li> <li>- Acceso a broncoscopia.</li> <li>- Acceso a ecografía</li> <li>- Acceso a fisioterapia respiratoria</li> </ul> |

Tabla 7. Características de una unidad de adultos para aplicar SRNI



### 9.3. Unidades pediátricas

El SRNI debe realizarse en un entorno seguro y con personal experimentado, preferentemente UCIP, con material, equipos y tubuladuras adecuadas al peso y edad del paciente. Se recomienda humidificación caliente para evitar el acúmulo de secreciones. También es recomendable la presencia de padres o cuidadores.

En cuanto a las necesidades de monitorización, se asegurará el acceso a gasometría venosa y el control continuo de nivel de conciencia, pulsioximetría, frecuencia respiratoria y frecuencia cardíaca. Debe realizarse una monitorización estrecha del paciente para evitar úlceras, distensión gástrica (presente ante presiones inspiratorias superiores a 25 cmH<sub>2</sub>O), barotrauma y conjuntivitis. Para este fin son útiles los algoritmos de cuidados elaborado y aplicados por personal de enfermería experto en VMNI [184].

### 9.4. Unidades de neonatos

Además de los requisitos de monitorización anteriormente especificados para el paciente pediátrico, es deseable la monitorización transcutánea de gases, acceso a radiología y ecografía torácicas y en cuanto a personal, especialista en neonatología o, en ausencia, especialista en pediatría con conocimientos en VMNI neonatal y en el manejo de la patología respiratoria neonatal y enfermería neonatal con experiencia en VMNI. La ratio recomendada enfermería-paciente es 1:2.

## 10. Necesidades de material y tecnología

### 10.1. Ventiladores

#### 10.1.1. Características deseables en los ventiladores utilizados para VMNI en paciente adulto

- Los ventiladores utilizados deberían ser específicos para VMNI y de fácil manejo, ya que la mayor parte de las veces deben ser utilizados por personal con alto índice de rotación. Por otra parte, los ventiladores de pacientes críticos, aunque la mayoría de ellos ya disponen de algoritmos específicos para VMNI, están diseñados mayormente para trabajar con circuitos sin fuga y doble tubuladura. No se recomienda la utilización de ventiladores domiciliarios en paciente agudo, salvo en aquellos casos de pacientes con ventilación domiciliaria y que presenten buena evolución inicial con su ventilador durante la fase aguda.
- Ligero de peso o en su defecto, fácilmente transportable (carro con ruedas).
- Con autonomía (dotados a ser posible de batería interna).
- Eficacia a la hora de compensación de fugas.
- Disponibilidad de puerto/mezclador interno para oxígeno (capaz de ofrecer un 100% de  $\text{FiO}_2$ ) u otro gas medicinal o bien posibilidad de conectar al sistema de alta presión de la toma de gases del medio hospitalario.
- Versatilidad en cuanto a modos ventilatorios más frecuentemente usados en VMNI, siendo la presión positiva continua (CPAP), doble nivel de presión o



presión de soporte (PSV), y ventilación con presión control (PCV) los modos indispensables.

- Posibilidad de realizar ventilación invasiva o en su defecto disponer de un software opcional, especialmente para eventualidades durante el transporte o necesidad de intubación urgente.
- Parametrización: debería poderse regular los niveles de presión, contar con un trigger inspiratorio sensible, primordialmente de flujo o electrónico, una rampa o *rise time* programable y un ciclado hacia espiración que puede ser predeterminado o programable.
- Monitorización de volumen corriente, fugas e idealmente curvas de presión y flujo tiempo en tiempo real.
- Dotación de alarmas suficiente y programable. (volumen corriente, volumen minuto, fuga, frecuencia de ventilación, apnea, presión baja).
- Versatilidad, para uso de diferentes tipos de material fungible (tubuladura, interfase, válvula espiratoria) sin que esto signifique pérdida de eficacia por parte del ventilador.
- Estar preparado para la posibilidad de uso de humidificación activa y aerosolterapia sin interferir en la calidad de la ventilación.

#### 10.1.2. Dispositivos para la aplicación de VMNI en pediatría

Habitualmente la falta de ventiladores específicos para pacientes en edad pediátrica conlleva el uso de otros equipos inicialmente ideados para la población adulta, pero que son fácilmente adaptables a la población pediátrica [17]. Se utilizan tanto ventiladores específicos para VMNI como convencionales con módulos de no



invasiva (no se consideran adecuados los que no dispongan de dicho módulo). Siempre que sea posible conviene utilizar equipos que estén homologados para adaptarse a pacientes hasta 5 kg de peso. Los lactantes con peso inferior al mencionado pueden presentar además problemas de adaptación y sincronización requiriendo sistemas de sensibilidad inspiratoria distintos a los de flujo convencionalmente utilizados, como el utilizado en la modalidad NAVA® (asistencia ventilatoria ajustada neuralmente), basada en la captura de la actividad eléctrica del diafragma [185,186].

### 10.1.3. Dispositivos para la aplicación de VMNI neonatal

En neonatología, los dispositivos ventilatorios se clasifican en generadores de flujo variable, que están específicamente diseñados para VMNI y que suelen ofrecer niveles de presión más estable y menor trabajo respiratorio y generadores de flujo continuo, que incluyen también la CPAP de burbujas y los resucitadores en T, permitiendo administrar presión continua o intermitente. La recomendación inicial sería utilizar los generadores de flujo variable frente a los de flujo continuo.

## 10.2. Material fungible

### 10.2.1. Tubuladuras y sistemas de válvula espiratoria

La mayoría de los ventiladores de VMNI utilizan circuitos de rama única donde debe existir obligatoriamente (siempre y cuando no lo incluya la mascarilla) un puerto espiratorio acoplado lo más cercano a la cara del paciente, necesario para evitar el fenómeno de re-inhalación de CO<sub>2</sub>, y que genera por definición una fuga intencional. Algunos circuitos de rama única incorporan asimismo una línea proximal de presión para la monitorización de la misma cerca del paciente, que contribuye también a la correcta estimación de la fuga y del volumen corriente.



Otros circuitos de rama única incorporan una válvula espiratoria neumática activa, de forma similar a las utilizadas en ventiladores de pacientes críticos. En estos casos, no deben emplearse concomitantemente puertos de fuga.

Algunos ventiladores ofrecen también la posibilidad de trabajar con circuitos de doble rama, donde inspiración y espiración están separadas evitando así el fenómeno de reinhalación de CO<sub>2</sub>, además de contribuir a la monitorización precisa del volumen tidal espirado.

Finalmente, se recomienda colocar un filtro antibacteriano a la salida del respirador. Asimismo, en enfermedades transmisibles, como el SARS-CoV2, es especialmente importante evitar la dispersión del virus a la atmósfera para la seguridad del personal sanitario, por lo que se recomienda colocar un segundo filtro vírico bacteriano entre la interfase y la fuga intencional, que no debe estar en la mascarilla sino en la tubuladura [101].

En pediatría, por razón de los ventiladores empleados, suelen utilizarse tubuladuras de doble rama conectadas mediante una pieza en “Y” a la interfase y, por tanto, sin fugas. En el resto de ventiladores se aplican las consideraciones hechas anteriormente en referencia a válvulas y puertos espiratorios.

En neonatología, los circuitos ventilatorios suelen ser de doble tubuladura en los generadores de flujo continuo o de tubuladura de diseño específico en flujo variable. Ambos circuitos comparten dos elementos, el mezclador de gases (aire/O<sub>2</sub>) para garantizar el ajuste de la FiO<sub>2</sub> administrada y el sistema de calentamiento y humidificación de gases (ver apartado correspondiente).

### 10.2.2 Interfases

Se trata del dispositivo de conexión que facilita la relación física pero también funcional entre dos elementos independientes: ventilador y paciente. Es un elemento indispensable en la VMNI, vehiculando la presión positiva hacia el enfermo sin ningún componente artificial introducido en la vía aérea.

Su correcta selección (tamaño, morfología en función de rasgos del paciente) es fundamental para el correcto desarrollo de la técnica, ya que es el elemento que con mayor frecuencia produce falta de confort y en un porcentaje elevado es causa de rechazo de la VMNI.

#### Características genéricas de una interfase adecuada para VMNI para paciente adulto

- Armazón de material rígido, transparente, ligero, con al menos un puerto accesorio multifuncional (medición de presiones, adición de gas, etc). En ocasiones puede incorporar el puerto espiratorio a modo de orificios en dicha estructura.
- Almohadillado que ejerza un sellado estable y confortable.
- Con válvula de seguridad anti-asfixia y poco espacio muerto instrumental a ser posible, para evitar reinhalacion.
- Con un sistema de sujeción (arnés) ligero, transpirable, no deformable con el uso, de material no alergénico, con un sistema de sujeción fácil de retirar en caso de urgencia.
- Modelos disponibles con tamaños variados.

En la tabla 8 se describen los tipos y características diferenciales de las principales interfases siendo las nasobucales y faciales totales de elección en el paciente agudo, aunque en la reciente pandemia por SARS-CoV2 se han publicado experiencias positivas con el casco o *helmet* [187]. Se han incluido en la tabla asimismo las cánulas nasales de TAFCN por considerarlas como un tipo específico de interfase (ver apartado 12.2.6)



Documento Español de Consenso sobre la utilización del Soporte Respiratorio No Invasivo en el paciente con Insuficiencia Respiratoria Aguda grave

| Tipo                  | Ventajas                                                                                                                                                                                                                              | Inconvenientes                                                                                                                                                                                                                                                                               |
|-----------------------|---------------------------------------------------------------------------------------------------------------------------------------------------------------------------------------------------------------------------------------|----------------------------------------------------------------------------------------------------------------------------------------------------------------------------------------------------------------------------------------------------------------------------------------------|
| <b>Nasales</b>        | Mayor comodidad.<br>Menor espacio muerto.                                                                                                                                                                                             | Fuga oral que conlleva menor eficiencia.<br><br>No se recomiendan en la IRA salvo intolerancias o en el destete/rotación de interfases.                                                                                                                                                      |
| <b>Oronasales</b>     | La más usada en IRA y en situación de emergencia en general.<br><br>Espacio muerto razonable (180 -200 cc).<br><br>Pueden aportar puerto espiratorio y debe aportar válvula de seguridad.<br><br>Amplia variedad de modelos y tallas. | Claustrofobia.<br><br>Posible aspiración por vómitos y secreciones.<br><br>Lesiones cutáneas u oculares por fuga.                                                                                                                                                                            |
| <b>Facial total</b>   | Mínima fuga peri- mascarilla.<br><br>Menor sensación de claustrofobia.<br><br>Mayor tolerancia.                                                                                                                                       | Mayor espacio muerto.<br><br>Posible aspiración por vómitos y secreciones.<br><br>Posible irritación ocular.<br><br>Posible condensación en humidificación activa si la superficie es grande<br><br>Dificultad para la administración de fármacos nebulizados por efectos en las conjuntivas |
| <b>Casco o helmet</b> | Posible si deformidad facial.<br><br>Posibilidad de hablar, toser y comer.<br><br>Menor sensación de claustrofobia.                                                                                                                   | Elevado espacio muerto (hasta 10 litros).<br><br>Alto coste.<br><br>Elevado ruido.                                                                                                                                                                                                           |

## Documento Español de Consenso sobre la utilización del Soporte Respiratorio No Invasivo en el paciente con Insuficiencia Respiratoria Aguda grave

|                                 |                                              |                                                               |
|---------------------------------|----------------------------------------------|---------------------------------------------------------------|
|                                 | Buena tolerancia.                            |                                                               |
| <b>Gafas nasales alto flujo</b> | Buena tolerancia<br>Diámetros diversos       | Aerosolización de partículas (a tener en cuenta en pandemias) |
| <b>Otras</b>                    | Olivas nasales.<br><br>Nasobucal con olivas. | Utilizadas en VMNI domiciliaria, menor experiencia en agudos. |

Tabla 8. Tipos de interfase

Procedimiento de colocación de la interfase:

- La comunicación con el paciente y su colaboración en la medida de lo posible es básica.
- Nunca colocar la interfase sin que el ventilador esté ya programado y dispuesto para iniciar la técnica.
- Asegurarse del correcto funcionamiento de la válvula antiasfixia.
- Proteger las zonas de presión, incluido cuello y axilas en caso de usar una interfase tipo casco (si usamos apósitos deben cambiarse una vez al día sobre todo en ancianos). La piel de la cara del paciente deberá ser hidratada en los descansos independientemente de la interfase utilizada y del método de protección usado.
- No ejercer demasiada presión al sujetar el arnés (permitir el paso de 2 dedos tras sujetarlo)
- Controlar las fugas no intencionales peri-mascarilla
- En caso de usar interfases tipo facial total o casco, intentar mantener las conjuntivas hidratadas.



## Documento Español de Consenso sobre la utilización del Soporte Respiratorio No Invasivo en el paciente con Insuficiencia Respiratoria Aguda grave

- Posición semisentada, con cabecera a 45 °. A destacar que en situación de pandemia por SARS-CoV2 se ha ensayado con éxito la combinación de VMNI o TAFCN y posición decúbito prono [188]

En cuanto a las interfases pediátricas, a pesar de los avances técnicos de los últimos años, todavía existen pocos modelos de interfaces específicas para pacientes pediátricos, siendo por otro lado muy alta la variabilidad en tamaño, forma de la cara y de la cabeza que se observa en el rango de edad atendido en pediatría, especialmente hasta los 6-8 años. Suelen utilizarse el mismo tipo de interfase descritas para los adultos, pero en talla pediátrica y deben tener las características genéricas arriba descritas. La colocación de la interfase, tras la protección de los puntos de apoyo, debe tener en cuenta la posibilidad de colaboración del paciente en edad pediátrica y las habilidades en la comunicación con el mismo.

Es aconsejable tener preparadas varias alternativas, especialmente para aquellos pacientes que por sus características físicas (perfil de la cara, presencia de úlceras por presión), tipo de enfermedad (insuficiente fuerza para activar sensibilidad inspiratoria) o posibilidad de colaboración (rechazo de la técnica por imposibilidad de comprender la situación) no se adaptan adecuadamente a la elegida inicialmente como teóricamente idónea.

La elección de interfase y sistema de fijación adaptado al recién nacido es un punto crucial para el éxito de la VMNI. El tamaño de la interfase es especialmente importante, debe minimizar las fugas y no provocar lesiones por decúbito. Los dispositivos que toleran mayor nivel de fuga área y permiten una fijación más laxa, junto con el uso de protectores hidrocoloides y la rotación de interfases evita este tipo de lesiones. Las principales interfases usadas en neonatología son las siguientes (figura 3):

- Cánulas binasales cortas, son las que tienen mayor grado de evidencia y su uso se relaciona con menor resistencia y tasa de reintubación comparado con a otras interfases.

## Documento Español de Consenso sobre la utilización del Soporte Respiratorio No Invasivo en el paciente con Insuficiencia Respiratoria Aguda grave

- Mascarilla nasal, como sistema alternativo de rotación con las cánulas binasales. El principal inconveniente en ambas interfases son las fugas por boca con pérdidas de hasta 2-3 cm H<sub>2</sub>O de presión.
- Tubo mono-nasofaríngeo. Se trata de un tubo endotraqueal cortado introducido hasta la nasofaringe, empleado principalmente en el contexto del transporte.
- Otras interfases: Cánulas RAM, máscara facial (en RN a termino), mascarilla buco-nasal (en sala de partos) [186].

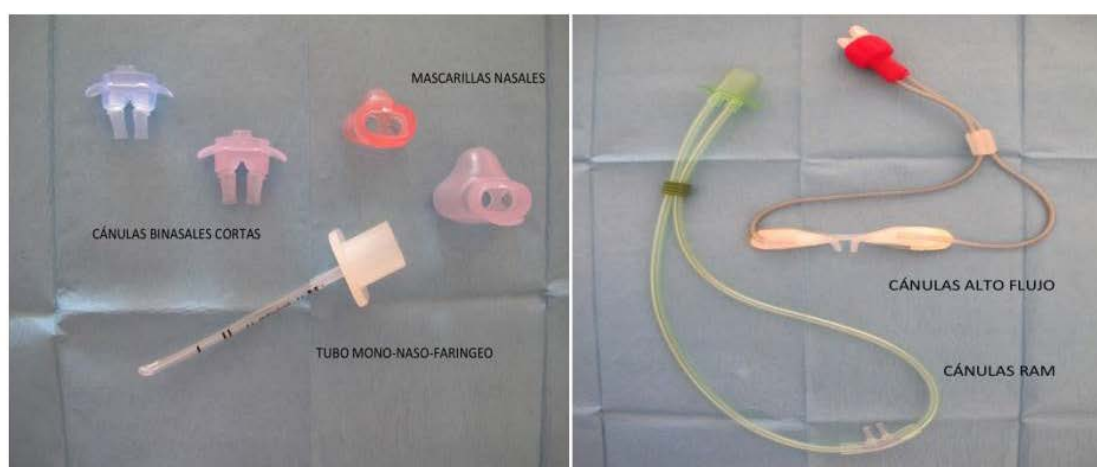

Figura 3. Principales tipos de interfaces utilizadas en VMNI neonatal: cánulas binasales cortas, mascarillas nasales, tubo nasofaríngeo, cánulas RAM y alto flujo.

La tabla 9 muestra diferentes opciones de selección de interfaces en el paciente pediátrico y neonatal en función de la edad.

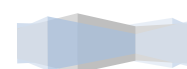

| Edad            | Primera opción         | Alternativa                  |
|-----------------|------------------------|------------------------------|
| Neonatos        | Prótesis binasal corta | Tubo mononasofaríngeo        |
|                 | Mascarilla nasal       | Cánula RAM                   |
|                 |                        | Máscara facial total         |
| Lactantes       | Facial total           | Prótesis binasal corta       |
|                 |                        | Casco                        |
|                 |                        | Mascarilla nasal             |
| 2 a 6 años      | Facial total           | Mascarilla nasal o buconasal |
| Mayor de 6 años | Facial total           | Mascarilla nasal o buconasal |

Tabla 9. Opciones técnicas de selección de interfase en paciente pediátrico y neonatal.

10.2.3. Humidificación y aerosolterapia. Dispositivos e indicaciones

En VMNI se recomienda usar sistemas de humidificación activa, que optimicen el gas a una temperatura y humedad fisiológicas (de 31 a 33°C), con una humidificación activa mayor de 30 mg H<sub>2</sub>O/L independientemente de los parámetros ventilatorios, existencia de fugas y condiciones ambientales. La humidificación activa no debe añadir resistencia ni espacio muerto al sistema.

La humidificación activa (con vapor de agua caliente) puede reducir la resistencia de las vías respiratorias altas y mejorar el confort en caso de fugas importantes [189]. En varios estudios a corto plazo, la humidificación activa disminuyó

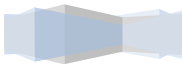



la sequedad de la vía aérea superior, con lo que podría mejorar la tolerancia y facilitar la eliminación de secreciones [190,191].

Esta recomendación es especialmente importante en los pacientes pediátricos en edad más temprana, en los cuales los altos flujos utilizados causan sequedad de la vía aérea y pueden dificultar el control de la temperatura corporal. También en el neonato el acondicionamiento de los gases se ha relacionado con mayor confort del paciente y mejoras en la mecánica respiratoria. En caso de utilizar mascarilla como interfase, la temperatura puede ser mal tolerada o provocar excesiva condensación y requerir ajuste adicional.

#### 10.2.4. Aerosolterapia

La aerosolterapia con broncodilatadores es un tratamiento habitual en muchos de los pacientes en los que se indica VMNI. Los objetivos primordiales serían aplicar la aerosolterapia sin discontinuar la VMNI (excepto en uso de interfases que incluyan los ojos aunque la experiencia en pediatría revela que no hay problemas cuando se administran beta2 adrenergicos o anti-colinergicos), e intentar el mayor depósito de fármaco en vía aérea distal con los menores efectos secundarios. En caso de utilizar nebulizador, si la fuga intencional está en la tubuladura, lo ideal es colocar el nebulizador entre la máscara sin fuga y la tubuladura. Por el contrario, si la fuga intencional está en la mascarilla, puede colocarse el nebulizador en la zona más proximal al ventilador [192].

Se dispone de diferentes dispositivos para realizar la aerosolterapia durante la VMNI:

- Nebulizadores ultrasónicos y de jet: adecuados para volúmenes mayores de solución, donde el fármaco se vehicula a través de tubos en T adaptados a la tubuladura principal.



- Nebulizadores de malla vibrante; son dispositivos ligeros, y capaces de aerosolizar soluciones y suspensiones de forma homogénea y en algunos modelos se puede acoplar directamente a la interfase.
- Cartucho presurizado con adaptador; precisan de cámaras espaciadoras de al menos 100 ml y su activación manual debe coincidir con la fase inspiratoria del ventilador. Deben acoplarse lo más cerca del paciente, entre el extremo distal de la tubuladura y la máscara.

En pediatría, la aerosolterapia se aplica de forma similar a la población adulta, siendo en ocasiones diferente el fármaco a administrar. Se mantiene asimismo la indicación de no suspender la VMNI para su administración. Aun teniendo en cuenta que pueda haber más pérdida de medicación en el circuito, prevalece la posibilidad de depositar más distalmente el fármaco en la vía respiratoria. No se ha demostrado que haya efectos secundarios significativos o diferentes de los habituales cuando se aplican broncodilatadores en aerosolterapia a niños ventilados con mascarilla facial total. La única excepción para tener en cuenta sería cuando la interfase es un casco, porque la medicación no se aplica directamente al paciente, si no que se acumula de forma poco eficaz en el gas que distiende el casco.

#### 10.2.5. Dispositivos de CPAP

Puede optarse por utilizar un ventilador convencional en modo CPAP o bien utilizarse un dispositivo no mecánico de CPAP. Estos últimos son sistemas de fácil manejo, bajo coste y tienen la ventaja de no depender de batería o corriente eléctrica, facilitando su aplicación en cualquier entorno incluso extrahospitalario. Este dispositivo consta de una máscara oronasal, la válvula que genera la presión positiva y el tubo de conexión a la fuente de gas-oxígeno. El dispositivo contiene en su pared

cuatro micro canales que aceleran el flujo, y convergen en la válvula virtual generando turbulencias que dan lugar a la presión. El nivel de presión generado depende del flujo de oxígeno administrado y de la mecánica ventilatoria del paciente, así para un flujo de 30 L/min se podría generar aproximadamente una CPAP entre 5 - 7 cm H<sub>2</sub>O en ausencia de fugas [193].

Por otra parte, su sistema de funcionamiento, no hermético, permite el paso de una sonda a través de ella para asistir al paciente (aspirar, etc.) o realizar procedimientos terapéuticos como la broncoscopia [194].

Aun siendo posible el uso de estos dispositivos en pediatría, la mayoría no está homologados para niños pequeños y se deberán realizar los oportunos controles y mediciones de flujo y presión, además de mantener una monitorización cardiorrespiratoria estricta y continua. Una mención especial merece la "Bubble CPAP" o CPAP de burbuja, una estrategia de ventilación no invasiva para lactantes y niños pequeños con síndrome de dificultad respiratoria secundaria a cuadros infecciosos. Con este método, el oxígeno mezclado y humidificado se administra a través de cánulas binasales cortas o máscara nasal y la presión en el circuito se mantiene sumergiendo el extremo distal del tubo espiratorio en agua. La profundidad a la que se sumerge el tubo bajo el agua determina la presión generada en las vías respiratorias. A medida que el gas fluye a través del sistema, "burbujea" y evita la acumulación de presiones excesivas. Especialmente importantes son los resultados obtenidos en el tratamiento de neumonía en niños pequeños en países con escasos recursos sanitarios y económicos [114,115]

#### 12.2.6. Dispositivos de TAFCN

Es un sistema que se incorpora como interfase una cánula nasal cómoda con un diseño capaz de ofrecer flujos de hasta 60 litros/minuto, con tallaje para pacientes adultos, pediátricos y neonatales. En el paciente pediátrico, el calibre de la cánula se adapta al tamaño de la nariz, ocupando aproximadamente el 50% de la misma, para permitir una fuga y evitar el fenómeno de la sobrepresión generada por el flujo, si no



tiene escape. En el neonato La fuga peri-cánula debe ser un 20-40% del diámetro de la coana. En todos los casos, la interfase se acopla a una tubuladura de conexión dotada de una resistencia interna en forma de filamento metálico que evita variaciones en la temperatura y posibles condensaciones en su interior. En general se recomienda usar agua desionizada o de lavado simple como fuente de humidificación. La regulación del gas se realiza mediante unos rotámetros calibrados de alto flujo, capaces de suministrar flujos de gas hasta 70 litros/minuto. Puede utilizarse un sistema con dos rotámetros (uno para fuente de O<sub>2</sub> y otro para fuente de aire) o bien un solo rotámetro para el O<sub>2</sub> adaptado a un sistema de turbina que proporciona el flujo de aire de manera análoga a como lo haría un ventilador. Además, incorpora un sistema de humidificación-calentamiento activo que siempre debe estar operativo y que es capaz de acondicionar el gas a condiciones fisiológicas es decir humedad relativa del 100% y temperatura de 37°C [195].

## 11. Programación de dispositivos

### 11.1. Breve recuerdo de los modos ventilatorios

#### 11.1.1. Variables de clasificación de los modos ventilatorios

La variable principal que determina el modo de ventilación es la variable de control o limitante, que es la que el ventilador controla y que se mantiene constante a pesar de los cambios en la mecánica ventilatoria. Las dos variables comúnmente controladas por los ventiladores son la presión y el volumen de modo que la ventilación mecánica se clasifica primariamente en ventilación volumétrica o controlada por volumen y ventilación barométrica o controlada por presión [196].

En la ventilación volumétrica el volumen programado se mantiene constante, y constituye la variable independiente mientras que la presión depende de la resistencia de la vía aérea y de la distensibilidad toracopulmonar. En la ventilación barométrica, la presión inspiratoria programada es constante y se establece como variable independiente, mientras que el volumen varía de acuerdo con el nivel de presión establecido y con los cambios en la mecánica del sistema respiratorio (tabla 10).

En la VMNI en fase aguda se utiliza principalmente la ventilación controlada por presión por su capacidad de compensar fugas y facilidad de sincronización con el paciente [80,196].



Documento Español de Consenso sobre la utilización del Soporte Respiratorio No Invasivo en el paciente con Insuficiencia Respiratoria Aguda grave

|                          | VENTILACION LIMITADA<br>POR VOLUMEN             | VENTILACION LIMITADA<br>POR PRESION                                                                                 |
|--------------------------|-------------------------------------------------|---------------------------------------------------------------------------------------------------------------------|
| VARIABLE INDEDEPENDIENTE | VOLUMEN                                         | PRESION                                                                                                             |
| VARIABLE DEPENDIENTE     | PRESION                                         | VOLUMEN                                                                                                             |
| COMPENSACION FUGAS       | NO                                              | SI                                                                                                                  |
| MODOS                    | Asistido controlada (A/C)<br><br>Controlada (C) | Asistida (S)<br><br>Asistida con frecuencia de rescate (S/T)<br><br>Asistido controlada (A/C)<br><br>Controlada (C) |

Tabla 10. Modalidades ventilatorias.

En los últimos años han surgido modos híbridos (AVAPS/iVAPS®) que combinan las ventajas de la ventilación limitada por presión con el objetivo de mantener un volumen corriente asegurado. El ventilador ajusta la presión inspiratoria entre unos límites (máximo y mínimo) para mantener el volumen prefijado. El nivel de presión inspiratoria no superará la presión máxima programada, aunque el volumen prefijado no fuese alcanzado. No existen datos suficientes en la literatura que avalen los beneficios de este modo híbrido frente al modo limitado por presión [197].

#### 11.1.2. Modos de ventilación y parámetros a programar en la ventilación controlada por presión

Documento Español de Consenso sobre la utilización del Soporte Respiratorio No Invasivo en el paciente con Insuficiencia Respiratoria Aguda grave

Según se refleja en la tabla 11, los parámetros principales a programar son los niveles de presión **inspiratoria y espiratoria** (IPAP/EPAP). La diferencia entre ambas presiones es lo que se conoce como **presión de soporte (PS)**. Debe tenerse en cuenta que en algunos ventiladores la programación se efectúa en base a este último valor (PS + EPAP o PEEP en algunos modelos) en lugar de programar la IPAP. La PEEP puede titularse a pié de cama mediante ultrasonografía si se precisa ventilar regiones dependientes colapsadas [198]. La misma técnica puede usarse para determinar la compensación de la Auto-PEEP [199,200].

| PARAMETROS A AJUSTAR EN LA VENTILACION LIMITADA POR PRESION |                                                                       |
|-------------------------------------------------------------|-----------------------------------------------------------------------|
| PRESION INSPIRATORIA (IPAP)                                 | Presión inspiratoria (cm H <sub>2</sub> O)                            |
| PRESION ESPIRATORIA (EPAP)                                  | Presión espiratoria (cm H <sub>2</sub> O)                             |
| PRESION SOPORTE (PS)                                        | Diferencial de presión (IPAP-EPAP) (cm H <sub>2</sub> O)              |
| FRECUENCIA RESPIRATORIA                                     | Respiraciones por minuto                                              |
| SENSIBILIDAD DE ACTIVACION (Trigger inspiratorio)           | Valor numérico o escala ordinal (L/min)                               |
| SENSIBILIDAD DE CICLADO (Trigger espiratorio)               | % de descenso del flujo pico, valor numérico o escala ordinal (l/min) |
| RAMPA O TIEMPO DE SUBIDA                                    | Milisegundos o escala numérica                                        |
| TIEMPO INSPIRATORIO MÁXIMO                                  | Segundos                                                              |
| TIEMPO ESPIRATORIO MÍNIMO                                   | Segundos                                                              |

Tabla 11. Resumen de parámetros a ajustar en la ventilación limitada por presión.

Además, hay que programar una serie de parámetros secundarios:



- **Rampa o rise time.** Corresponde al tiempo que transcurre entre el inicio del ciclo inspiratorio y el momento en que se alcanza la presión inspiratoria establecida. Cuanto mayor sea la demanda de flujo por parte del paciente, más rápida será la necesidad de presurizar su vía aérea. Cabe destacar que esta variable influye directamente en el trigger espiratorio o sensibilidad del ciclado modificando los tiempos de ciclado según se alcance antes o no el pico de flujo inspiratorio
- **Frecuencia respiratoria:** número de respiraciones controladas suministradas por el ventilador en un minuto en ausencia de esfuerzo del paciente. Suele programarse ligeramente por debajo de la FR del paciente
- **Tiempo inspiratorio mínimo y máximo:** algunos ventiladores disponen de un mecanismo de seguridad de límite de tiempo máximo para la duración de la inspiración para hacer frente a inspiraciones muy prolongadas en caso de fugas graves. Asimismo, existe la posibilidad de limitación por tiempo mínimo para evitar ciclos muy cortos.
- **Trigger inspiratorio o umbral de activación:** indica el nivel de esfuerzo del paciente requerido para iniciar una respiración asistida por el ventilador. Habitualmente se ajusta en escala numérica (1-9) o nominal (Trigger sensible: 1-3 / medio 4-6 y poco sensible > 6 lpm).
- **Trigger espiratorio o sensibilidad de ciclado:** indica el nivel de flujo al que se produce el cambio de inspiración a espiración. Puede establecerse como un porcentaje del flujo máximo alcanzado (por ejemplo, a 25% del pico de flujo inspiratorio), o bien a valores predeterminados del mismo que se ajustan en escala numérica [1-9] o nominal (sensible, medio, poco sensible). Cabe destacar que algunos respiradores disponen de un mecanismo automático tanto de activación como de ciclado (Auto-Trak Sensitivity™ Respirationics) que detecta de forma continua los patrones respiratorios del paciente y ajusta automáticamente los umbrales de sensibilidad y ciclado.



Documento Español de Consenso sobre la utilización del Soporte Respiratorio No Invasivo en el paciente con Insuficiencia Respiratoria Aguda grave

Teniendo en cuenta lo anteriormente expuesto, los ventiladores de presión pueden funcionar en modo espontáneo o asistido (S), donde la frecuencia respiratoria es la frecuencia espontánea del paciente (no existe frecuencia de seguridad); espontaneo/temporizado (“spontaneous/timed” o asistido/controlado), donde además de las respiraciones iniciadas por el paciente, se suministran respiraciones adicionales iniciadas por el ventilador en caso de que la frecuencia respiratoria del paciente caiga por debajo de la frecuencia de respaldo configurada o controlada donde el ventilador inicia los ciclos respiratorios al fijarse una frecuencia respiratoria y el ciclado se produce por tiempo inspiratorio fijo. Por tanto, es un modo de ventilación activado por tiempo, limitador por presión y ciclado por tiempo. Si se utiliza presión control, una variedad es el modo asistido/controlado donde el ciclado siempre se produce por tiempo, independientemente si los ciclos son espontáneos o del ventilador (tabla 12).

|          | ACTIVACION                             | CICLADO                                 |
|----------|----------------------------------------|-----------------------------------------|
| MODO S   | PACIENTE                               | PACIENTE                                |
| MODO S/T | PACIENTE O VENTILADOR (FR de respaldo) | PACIENTE                                |
| Modo A/C | PACIENTE O VENTILADOR (FR de respaldo) | VENTILADOR (ajuste tiempo inspiratorio) |
| MODO C   | VENTILADOR (ajuste de FR)              | VENTILADOR (ajuste tiempo inspiratorio) |

*Tabla 12. Activación y ciclado en los diferentes modos ventilatorios (S: asistida; S/T: asistida con frecuencia respiratoria de seguridad; A/C: asistido-controlada, C: controlada)*

A nivel de la práctica clínica, la ventilación por presión en modo espontaneo/asistido es el modo de elección en la insuficiencia respiratoria aguda hipercapnica. Es importante conocer las características y nomenclatura del equipo para optimizar el ajuste de parámetros. En pediatría, la ventilación en modo



espontáneo/asistido también es el modo de elección en la insuficiencia respiratoria aguda global, tipo II y el modo de rescate en la insuficiencia respiratoria tipo I que no se consiga mejorar con CPAP.

### 11.1.3. Otros sistemas de asistencia respiratoria: CPAP y TAFCN

No se consideran propiamente sistemas de ventilación en sí ya que no proporcionan apoyo inspiratorio

#### **CPAP (Continuous Positive Airway Pressure)**

Se trata de una modalidad de presión positiva continua suministrada durante todo el ciclo respiratorio aplicada sobre la respiración espontánea del paciente. Por tanto, únicamente debe programarse un nivel de presión positiva, que genera efectos respiratorios y hemodinámicos beneficiosos [201,202].

#### **Terapia de alto flujo con cánulas nasales (TAFCN)**

El sistema de TAFCN suministra una mezcla de oxígeno-aire que puede satisfacer o superar la demanda inspiratoria espontánea de los pacientes [203], permite aplicar una  $FiO_2$  del 21 al 100%, generando velocidades de flujo de hasta 60 lpm. Aunque no es un sistema de ventilación en sí, su capacidad para obtener mejores concentraciones de oxígeno con mayor comodidad para el paciente hace que se haya generalizado su uso tanto en pediatría [204] como en adultos en el tratamiento de la insuficiencia respiratoria aguda hipoxémica no EAP [205].

## Documento Español de Consenso sobre la utilización del Soporte Respiratorio No Invasivo en el paciente con Insuficiencia Respiratoria Aguda grave

Se postulan tres mecanismos de acción de TAFCN: un efecto de lavado en el espacio muerto nasofaríngeo, una reducción de la resistencia de las vías respiratorias superiores, con la consecuente disminución en el trabajo respiratorio [206] y un cierto nivel de PEEP [207]. Por otra parte, no hay que olvidar el efecto beneficioso en el transporte mucociliar [208].

### 11.2. Programación de los dispositivos

#### 11.2.1. VMNI en el paciente adulto

##### **Procedimiento genérico / aproximación**

Si se utiliza un modo de presión puede programarse una presión inspiratoria inicial en torno a 10-12 cm H<sub>2</sub>O y espiratoria en torno a 5-6 cm H<sub>2</sub>O, con FiO<sub>2</sub> necesaria para alcanzar el nivel de oxigenación pretendido. Incluso sería posible si la situación clínica lo permite iniciar el tratamiento unos minutos con una CPAP para luego pasar a presión de soporte en cuanto se confirme tolerancia clínica.

A partir de aquí los cambios se realizarán de acuerdo con los cambios en la FR, del volumen corriente (VT), los parámetros gasométricos y de mecánica respiratoria. Los objetivos serían un VT superior a 300 ml (o 5 ml por kilo de peso ideal) y una FR menor de 25 rpm. Si la hipoxemia es grave, puede incrementarse lentamente la presión espiratoria (EPAP o PEEP) hasta intentar alcanzar una SpO<sub>2</sub> de 90% con una FiO<sub>2</sub> menor del 60%. En cualquier caso, la corrección debe ser progresiva y la aparición de deterioro gasométrico en los primeros controles debe hacer replantear el tratamiento.

Procedimiento específico para cada uno de los parámetros:

- **Niveles de presión de soporte objetivos (IPAP/PS):**



## Documento Español de Consenso sobre la utilización del Soporte Respiratorio No Invasivo en el paciente con Insuficiencia Respiratoria Aguda grave

- A medida que se incrementa la PS desciende el trabajo inspiratorio. Sin embargo, una excesiva presión de soporte [209] puede conllevar intolerancia del paciente y desincronización con el ventilador.
- **Nivel de presión espiratoria (EPAP/PEEP):**
  - Los objetivos de la EPAP/PEEP elegida deben ser, en primer lugar contrarrestar la AutoPEEP cuando esta existe, especialmente en pacientes EPOC [210], aumentar la CRF, con la consiguiente mejoría de la relaciones ventilación-perfusión (característico en el EAP), prevención de la re-inhalación (suele ser suficiente una EPAP mínima de 4 cm H<sub>2</sub>O) en caso de utilizarse circuito de rama única [211] y prevención del colapso de vía aérea superior en pacientes con apnea obstructiva del sueño [212].
  - Así pues, se puede empezar con una PEEP/EPAP mínima de 4 cm H<sub>2</sub>O e ir aumentándola, buscando contrarrestar la Auto-PEEP y en caso de pérdida de aireación en las zonas dependientes la ecografía torácica puede ser útil en la titulación si se tiene experiencia. Finalmente, ante disminuciones periódicas del flujo deben sospecharse apneas o hipopneas y debe procederse a titular la PEEP/CPAP hasta anularlas.
- **Parámetros secundarios:**
  - **Trigger o umbral.** Los umbrales de activación del respirador pueden ser de presión o de flujo. En general se considera que la selección por umbral de flujo es mejor que por umbral de presión, pero su diferencia en cuanto a eficacia clínica o de adaptación al ventilador no está determinada [213]. En umbrales muy sensibles puede aparecer el denominado “autotrigger”, o activación del respirador sin impulso inspiratorio del paciente. Ocurre principalmente en situaciones de fuga elevada, frecuencias respiratorias muy bajas e impulsos ventilatorios bajos. En el extremo opuesto se sitúa el denominado “ciclo fallido” (esfuerzo ineficaz), donde el paciente genera un esfuerzo inspiratorio

que no llega a alcanzar el umbral de flujo, situación que se presenta con frecuencia en los casos de hiperinsuflación dinámica o si el trigger inspiratorio es excesivamente exigente. Ambas asincronías tienen importantes consecuencias clínicas y fisiopatológicas porque incrementan el trabajo respiratorio y pueden motivar el fracaso de la VMNI.

- **Rampa de presurización.** En un estudio, las rampas intermedias presentaron los mejores resultados en cuanto a tolerancia. Por el contrario, las rampas excesivamente lentas provocaron descenso del volumen corriente e incrementos de la frecuencia y trabajo respiratorios [214]. No existe por tanto una regla fija para determinar qué tiempo de rampa es mejor, pero parece que tanto los tiempos prolongados como los excesivamente cortos se asocian a asincronía [215]. Parece indicado individualizar la rampa, recomendándose empezar en rampas de presurización medias e ir ajustándola buscando como objetivo la menor frecuencia respiratoria, el mayor VT y una mecánica respiratoria óptima, considerando además el confort del paciente.
- **Tiempo inspiratorio / Ciclado a espiración.** En condiciones normales, deberá acortarse el tiempo inspiratorio en los casos de obstrucción al flujo a fin de evitar el atrapamiento aéreo. Por el contrario, incrementos en el tiempo inspiratorio, sin exceder el cociente de 1:1 pueden ser necesario en los casos que requieran una mayor eficiencia ventilatoria. Considerar asimismo en presencia de fugas el uso del “tiempo inspiratorio máximo” si el ventilador incorpora dicho parámetro (ajustarlo a un tiempo fisiológico de 0,8 a 1,2 segundos). La falta de ajuste del tiempo inspiratorio que el respirador proporciona [216] puede ser otra fuente de asincronías (ver apartado de monitorización).



### 11.2.2. Programación de ventilación en pediatría

Aunque los modos de presión son más utilizados, también puede usarse en modalidad volumétrica, programando en primer lugar el volumen corriente (VT), que debe ser mayor que el que se utiliza en ventilación invasiva (puede llegar a ser el doble), para compensar el espacio muerto y la fuga de la interfase. La PEEP puede iniciarse con 4 cmH<sub>2</sub>O y aumentar hasta 8-10 en función de la hipoxemia y de las atelectasias.

En modalidades de presión, el nivel de PS debe ser de alrededor de 4-5 cmH<sub>2</sub>O sobre PEEP. Una vez conseguida la tolerancia puede incrementarse en intervalos de 2 cm H<sub>2</sub>O de presión inspiratoria hasta lograr disminuir el trabajo respiratorio (en general entre 12 y 18 cm H<sub>2</sub>O). La FR de seguridad en caso de PS se programa habitualmente a valores entre 15-20 respiraciones por minuto. La relación I:E y el tiempo inspiratorio deben ser los más próximos a los del paciente (en IRA típicamente tiempos inspiratorios cortos y en pacientes pediátricos en edad temprana incluso muy cortos (0,3-0,5 segundos). El trigger inspiratorio suele ser de flujo, pero en ocasiones el paciente puede no llegar a activar el ventilador (hecho frecuente en pacientes en edad pediátrica menores de tres meses), precisando en esta situación el incremento de FR de rescate muy próxima a la del niño (el respirador “manda sobre el niño”). El uso de la modalidad NAVA<sup>®</sup>, a la cual se ha hecho referencia anteriormente como posibilidad de mejorar la sincronía no está disponible universalmente. Su uso en VMNI pediátrica y neonatal se inició en 2010, siendo muy prometedora, donde la sincronía paciente-ventilador es su principal ventaja. Su principal inconveniente es el coste y la curva de aprendizaje de la técnica. En manos expertas los resultados son óptimos en todas las edades [184–186]. En cuanto a las rampas de presurización y al ciclado a espiración son válidas las consideraciones arriba indicadas para la población adulta, pero siempre teniendo en cuenta que el tiempo inspiratorio fisiológico en los pacientes en edad pediátrica es inferior al del adulto y varía con la edad de forma inversamente

proporcional a la FR. En caso de hipoxemia se programará una FiO<sub>2</sub> o se proporcionará un suplemento de oxígeno en la rama inspiratoria. Se buscará incrementar lentamente la presión espiratoria hasta intentar alcanzar una SaO<sub>2</sub> mayor o igual a 93% con la menor FiO<sub>2</sub>

Cuando se usan respiradores no específicos de VMNI se recomienda el uso de modalidades asistido-controladas (espontáneo-controladas). Este hecho será de mayor interés cuanto menor sea el paciente dada la elevada frecuencia respiratoria basal. En estos casos se aplican las consideraciones hechas anteriormente en las modalidades para adultos.

11.2.3. Protocolo de inicio de la VMNI en el neonato

Los parámetros de inicio se acostumbran a pautar en función de la modalidad, peso y/o edad gestacional y patología respiratoria. La FiO<sub>2</sub> se debe ajustar de acuerdo con los objetivos de SpO<sub>2</sub> según se especifica en la tabla 13. En las modalidades de presión la presión inspiratoria suele ajustarse a valores de presión superior unos 2-4 puntos por encima del nivel de PEEP, que puede variar en función del reclutamiento alveolar requerido y la tolerancia hemodinámica. La PEEP inicial suele ser de 5-6 cmH<sub>2</sub>O para aumentar hasta 7-8 cmH<sub>2</sub>O.

| E. gestacional | Objetivo de saturación de Hb (%) | Alarmas min/max % * |
|----------------|----------------------------------|---------------------|
| ≤32 semanas    | 90-94%                           | 89-95%              |
| >32 semanas**  | 92-97%                           | 91-98%              |

Tabla 5. Relación entre SpO<sub>2</sub> y edad gestacional en el neonato.

11.2.4. Programación específica de la TAFCN

En adultos, se puede iniciar la TAFCN con una FiO<sub>2</sub> mínima para mantener la SpO<sub>2</sub> alrededor de 93-94% - en casos de enfermedad pulmonar crónica asociada SpO<sub>2</sub> entre 88-89% -, y una temperatura de 37°C. El objetivo terapéutico en cuanto al flujo

## Documento Español de Consenso sobre la utilización del Soporte Respiratorio No Invasivo en el paciente con Insuficiencia Respiratoria Aguda grave

para el paciente adulto se considera a partir de 45-50 l/m [217]. Este hecho, junto a la hipotética necesidad de FiO<sub>2</sub> alta y la menor seguridad en la fijación de la cánula nasal (riesgo de retirada accidental) hacen especialmente importante el entorno de monitorización en este tipo de terapia.

Roca et al [218] describieron una forma sencilla de analizar el riesgo de intubación a las 12 h, en pacientes con neumonía tratados con TAFCN, con el denominado índice ROX (SpO<sub>2</sub>/FiO<sub>2</sub>:FR). Un valor  $\geq 4,88$  se asocia a mayor probabilidad de éxito en el tratamiento del paciente.

En paciente en edad pediátrica, la programación inicial de la TAFCN no está todavía bien definida. Como regla general, en lactantes menores de un año los flujos deben ser siempre mayores de 2 L/min y deben ajustarse al peso corporal bajo la fórmula de 2 L/kg/min hasta los 8-10 kg de peso. En los pacientes en edad pediátrica mayores, los flujos deben ser siempre superiores a 6 l/min y se pueden utilizar hasta 20 o 30 l/min, cercano a lo que sería 1 l/kg/min. La FiO<sub>2</sub> debe ajustarse para un objetivo de saturación periférica de oxígeno entre 92 y 97%. La temperatura, por defecto, se sitúa alrededor de 37°C para conseguir una humidificación óptima. Para evitar fenómenos de condensación, se puede aislar la tubuladura si la temperatura de la habitación es baja. Excepcionalmente se puede bajar la temperatura de la tubuladura a 34°C [175]. En los más pequeños se puede usar un chupete para disminuir las fugas por la boca y mantener el efecto PEEP de la TAFCN.

En neonatología, la principal indicación de la TAFCN sigue siendo el soporte post-retirada de otras modalidades de VMNI, pero cada vez se utiliza más como modalidad inicial de soporte, con un rango inicial de entre 4 a 8 L/min de flujo. Cuando se alcancen los objetivos clínicos y gasométricos puede iniciarse el descenso hasta 2 l/min, momento en el que ya se pueden retirar.

Uno de los retos de futuro sería establecer y protocolizar en las guías de tratamiento las indicaciones reales y los protocolos de inicio y retirada para la TAFCN [219].



## **TERCERA PARTE: SEGUIMIENTO Y MONITORIZACION**



## 12. Procedimiento de monitorización y controles de la VMNI /TAFCN en adultos

La monitorización en el manejo del fallo respiratorio agudo durante el SRNI debe ser capaz de detectar precozmente las complicaciones y signos de fracaso terapéutico, evitando el retraso de la intubación orotraqueal (IOT) y el inicio de la ventilación mecánica invasiva (VMI) en los casos indicados [220,221]. La estrategia de monitorización debe individualizarse en cada paciente y depende de la gravedad clínica y el ámbito donde se desarrolle. Se basa en los siguientes puntos:

### 12.1. Parámetros fisiológicos

- Nivel de conciencia del paciente: la persistencia de un bajo nivel de conciencia sin otra causa que lo justifique sugiere fracaso terapéutico.
- Frecuencia respiratoria: la disminución de la FR en las primeras horas de tratamiento es un signo de buena respuesta. La bradipnea (<10 rpm), sin embargo, puede indicar fracaso.
- Trabajo respiratorio: el uso de la musculatura respiratoria accesoria disminuye ante una buena respuesta al tratamiento, al igual que la respiración paradójica. La respiración en boqueadas o “gasping” nos indica la necesidad de IOT inmediata en casos con indicación.
- Frecuencia cardíaca y ritmo: la taquicardia es una respuesta fisiológica a la hipoxemia, por lo que normalmente remite o mejora con un adecuado soporte ventilatorio y tratamiento de la enfermedad de base. La bradicardia debe poner alerta ante una posible parada cardio-respiratoria y necesidad de IOT.

- Tensión arterial: la hipertensión puede aparecer como parámetro de fase aguda y su persistencia puede estar relacionada con la intolerancia a la terapia ventilatoria. La aplicación de presión positiva intratorácica conlleva cambios en la precarga y postcarga y en pacientes con un ventrículo izquierdo disfuncionante, puede llevar al deterioro, aparición de hipotensión con bajo gasto y necesidad de IOT.

## 12.2. Parámetros del intercambio gaseoso y electrocardiograma

- Saturación de oxihemoglobina por pulsioximetría ( $\text{SpO}_2$ ): debe utilizarse en la monitorización continua, especialmente durante las primeras horas. Puede no ser fiable con la presencia de carboxihemoglobina y metahemoglobina y, especialmente, en estados de baja perfusión periférica o uso de fármacos vasoactivos.
- Gasometría arterial: Debe realizarse un primer control a la hora del inicio de la VMNI. Si la evolución es favorable, los controles posteriores serán por decisión del clínico. Algunos autores postulan la posibilidad de realizar dichos controles con gasometría venosa, al menos, en algunos grupos de pacientes, tales como el EAP cardiogénico sin shock y sin patología respiratoria obstructiva crónica [222].
- Monitorización transcutánea de  $\text{PaO}_2$  y  $\text{PaCO}_2$ : método no invasivo con buena correlación con los gases arteriales lo que lo hace óptimo para la monitorización continua, especialmente de la  $\text{PaCO}_2$ .



- Electrocardiograma: su monitorización es aconsejable siendo importante en pacientes con una frecuencia cardíaca mayor de 120 latidos por minutos o en caso de arritmia o cardiomiopatía [223].

### 12.3. Parámetros del ventilador

Muchos de los equipos de ventilación permiten monitorizar a tiempo real las curvas de flujo y presión. El análisis visual de la morfología de dichas curvas puede ayudar a identificar interacciones patológicas paciente-ventilador.

Según el equipo, también se dispone de una estimación de las fugas, el volumen corriente, la frecuencia respiratoria y la presencia de ciclos espontáneos o controlados. La monitorización de las fugas es importante, dado que la fuga no intencionada, ocurrida por mal ajuste de la interfase puede producir asincronías, falta de confort y fallo de la ventilación. La monitorización del volumen corriente en modalidad de presión es asimismo importante para detectar y tratar tanto la hipoventilación como los volúmenes corrientes elevados que pueden inducir asincronías o empeorar la lesión pulmonar inducida por el ventilador, aún empleando VMNI [224]. Su valor normal es aproximadamente 5-10 ml/Kg de peso ideal [225] e importantes variaciones en éste pueden sugerir la presencia de fugas u obstrucción de vía aérea superior (VAS). Las asincronías más frecuentes en modalidad de presión se resumen, junto con los mecanismos y su corrección en la tabla 14 [19,226–229]. Asimismo, la Figura 4 muestra la secuencia de valoración jerárquica de las asincronías.

Documento Español de Consenso sobre la utilización del Soporte Respiratorio No Invasivo en el paciente con Insuficiencia Respiratoria Aguda grave

| Tipo       | Fase en que se produce | Asincronía        | Causa                                                                                                                                                                                                                     | Solución                                                                                                                                                                                                                                                                                                                                  |
|------------|------------------------|-------------------|---------------------------------------------------------------------------------------------------------------------------------------------------------------------------------------------------------------------------|-------------------------------------------------------------------------------------------------------------------------------------------------------------------------------------------------------------------------------------------------------------------------------------------------------------------------------------------|
| Extrínseca |                        | Fuga              | <ul style="list-style-type: none"> <li>• Mal ajuste de mascarilla</li> <li>• Mala conexión de circuito</li> </ul>                                                                                                         | <ul style="list-style-type: none"> <li>• Ajustar de mascarilla y arneses</li> <li>• Cambiar de mascarilla</li> <li>• Conectar correctamente las piezas del circuito</li> </ul>                                                                                                                                                            |
|            |                        | Cierre de VAS     | <ul style="list-style-type: none"> <li>• Eventos obstructivos</li> <li>• Cierre de glotis</li> </ul>                                                                                                                      | <ul style="list-style-type: none"> <li>• Aumentar la EPAP (PEEP)</li> <li>• Disminuir la PS</li> </ul>                                                                                                                                                                                                                                    |
| Intrínseca | Esfuerzo inspiratorio  | Esfuerzo ineficaz | <ul style="list-style-type: none"> <li>• Trigger inspiratorio poco sensible</li> <li>• Auto-PEEP: por patología obstructiva o excesivo soporte</li> <li>• Ciclos prolongados</li> </ul>                                   | <ul style="list-style-type: none"> <li>• Aumentar la sensibilidad del trigger inspiratorio</li> <li>• Aumentar la EPAP o disminuir la PS (según causa)</li> </ul>                                                                                                                                                                         |
|            |                        | Autotrigger       | <ul style="list-style-type: none"> <li>• Fugas</li> <li>• Trigger inspiratorio muy sensible</li> <li>• EPAP excesiva</li> <li>• Problemas en las tubuladuras</li> <li>• Hipo</li> <li>• Interferencia de la FC</li> </ul> | <ul style="list-style-type: none"> <li>• Control de fugas</li> <li>• Trigger inspiratorio más duro</li> <li>• Disminuir EPAP</li> <li>• Corregir problemas en las tubuladuras</li> <li>• Tratar el hipo si es necesario</li> <li>• Comprobar frecuencia y ritmo cardíaco y si es necesario, iniciar medidas para su corrección</li> </ul> |
|            |                        | Doble trigger     | • Demanda ventilatoria no satisfecha                                                                                                                                                                                      | • Aumentar Tinsp y/o soporte                                                                                                                                                                                                                                                                                                              |
|            | Presurización          | Demanda de flujo  | • Tiempo de presurización excesivamente lento                                                                                                                                                                             | <ul style="list-style-type: none"> <li>• Aumentar la velocidad de presurización</li> <li>• Aumentar la PS</li> </ul>                                                                                                                                                                                                                      |
|            |                        | Overshooting      | • Tiempo de presurización excesivamente rápido                                                                                                                                                                            | • Disminuir la velocidad de presurización ("rampa")                                                                                                                                                                                                                                                                                       |
|            | Ciclado                | Ciclo corto       | • Tinsp del ventilador menor que el demandado por el paciente                                                                                                                                                             | <ul style="list-style-type: none"> <li>• Aumentar el Tinsp (aumento del Tinsp máximo o modificar el criterio de ciclado)</li> <li>• Aumentar de PS</li> </ul>                                                                                                                                                                             |
|            |                        | Ciclo largo       | • Tiempo inspiratorio del ventilador mayor que el demandado por el paciente                                                                                                                                               | <ul style="list-style-type: none"> <li>• Corregir fugas</li> <li>• Disminuir el Tinsp (disminuir el Tinsp máximo o modificar el criterio de ciclado)</li> <li>• Disminuir la IPAP</li> </ul>                                                                                                                                              |

Tabla 14. Asincronías: causas y soluciones.

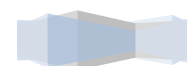

## Documento Español de Consenso sobre la utilización del Soporte Respiratorio No Invasivo en el paciente con Insuficiencia Respiratoria Aguda grave

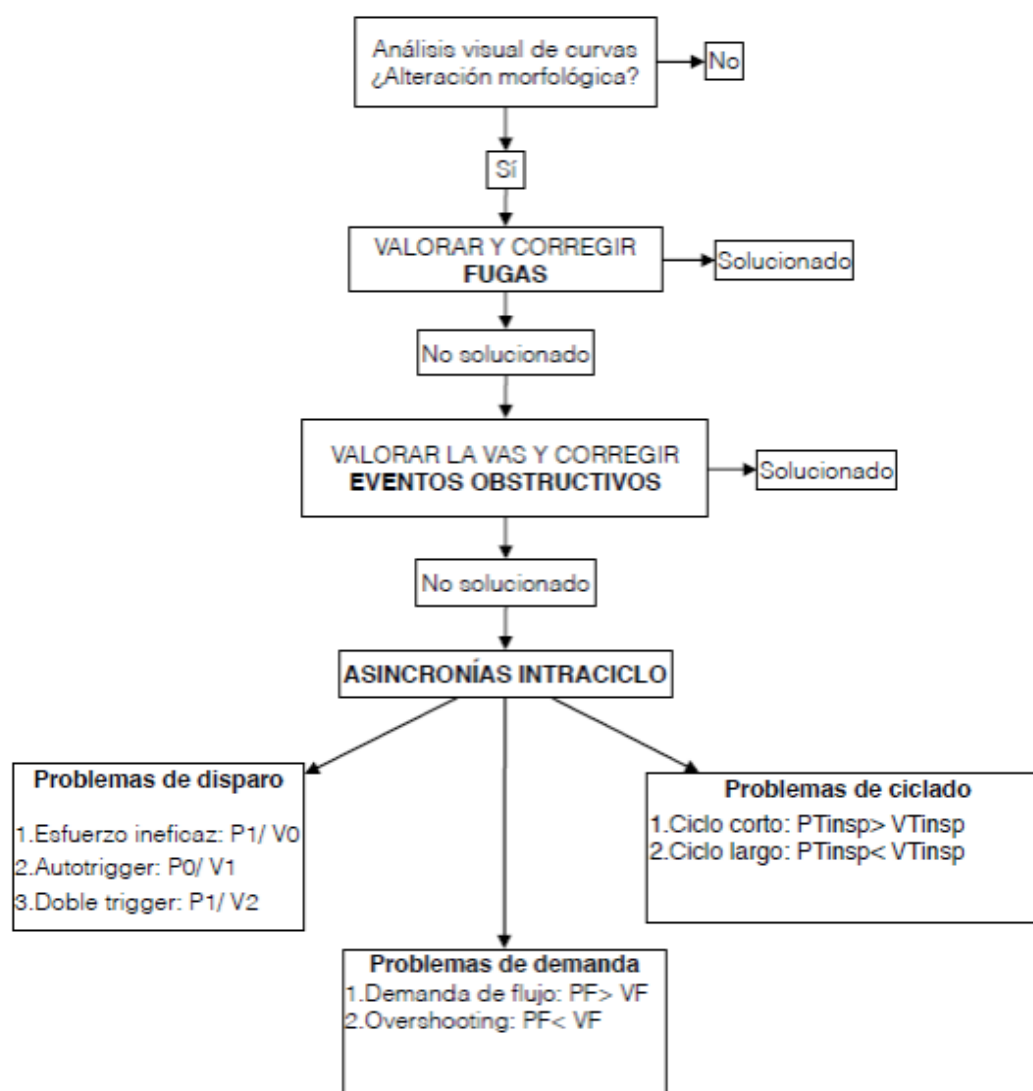

Figura 4. Valoración esquemática de asincronías.

VAS= vía aérea superior. P: paciente. V: ventilador. 0,1,2 = número de ciclos demandados por P o asistidos por V. F= flujo.  $PF > VF$ = el paciente demanda un flujo mayor al aportado por el ventilador.  $PF < VF$ = el ventilador aporta un flujo mayor del demandado por el paciente.  $PT_{insp} > VT_{insp}$ = el tiempo inspiratorio del Paciente es mayor del tiempo inspiratorio proporcionado por el Ventilador.  $PT_{insp} < VT_{insp}$ = el tiempo inspiratorio del paciente es menor del proporcionado por el Ventilador.

## 13. Criterios de fracaso. Acciones terapéuticas en caso de fracaso

### 13.1. Fracaso de la VMNI

El aumento de la mortalidad hospitalaria entre los pacientes con fracaso de la VMNI que han requerido intubación endotraqueal [230,231], especialmente si ha sido demorada [62], obliga a detectar precozmente un eventual fracaso de la VMNI [34].

#### 13.1.1. Criterios de fracaso de la VMNI

La interrupción de la VMNI por fracaso debe realizarse si después de la corrección de los parámetros ventilatorios y ajuste de mascarilla no se obtiene una respuesta satisfactoria clínica o gasométrica o se produce un empeoramiento de los mismos en la valoración a la hora posterior (o antes en caso de sospecharse empeoramiento clínico) del inicio de la VMNI [232,233].

Los criterios clínicos y gasométricos indicativos de fracaso de la VMNI se resumen de la siguiente forma [234]

- (1) Deterioro de las condiciones del paciente o incapacidad de mejorar los síntomas:
  - a. Persistencia de la disnea y del aumento del trabajo respiratorio con tiraje intercostal y supraclavicular.
  - b. Persistencia de frecuencia respiratoria elevada. El aumento de la frecuencia respiratoria al cabo de una hora de iniciada la técnica puede ser predictiva de fracaso de VMNI [235], mientras que una reducción de la misma puede ser predictiva de éxito [236].
  - c. Deterioro del nivel de consciencia (encefalopatía o agitación).



- (2) Intolerancia a la técnica con deseo del paciente de retirar el tratamiento con VMNI.
- (3) Incapacidad de sincronización con el respirador.
- (4) Ausencia de mejoría de la gasometría arterial o deterioro de la misma durante las primeras horas de VMNI. Puede valorarse al cabo de una hora de tratamiento y es bastante indicativo a las 6 h [232]. Es importante destacar, sin embargo, que la gasometría por sí misma no es un criterio de intubación. El parámetro para valorar la eficacia de la VMNI diferirá en función de la alteración gasométrica inicial:
  - a. Insuficiencia respiratoria hipercápnica: en pacientes sin EPOC con IRA hipercápnica, la persistencia de acidosis respiratoria con niveles de  $\text{PaCO}_2$  elevados al cabo de una hora de VMNI es predictiva de fracaso [230].
  - b. Insuficiencia respiratoria aguda hipoxémica: la presencia de  $\text{PaO}_2/\text{FiO}_2 \leq 146$  mm Hg al cabo de una hora de VMNI, o una  $\text{PaO}_2/\text{FiO}_2 \leq 175$  mm Hg en pacientes con síndrome de distrés respiratorio agudo (SDRA) se ha asociado de forma independiente a fracaso de la técnica [232,233]. No hay recomendaciones precisas para determinar el fracaso de la VMNI en la insuficiencia respiratoria hipoxémica ya que puede ser consecuencia de diferentes entidades clínicas [232].
- (5) Importante broncorrea que el paciente es incapaz de expectorar.
- (6) Inestabilidad hemodinámica, isquemia miocárdica aguda, arritmias ventriculares potencialmente letales.
- (7) Necesidad de intubación endotraqueal inmediata.



### 13.1.2. Fracaso en función del tipo de patología de base

La patología que motiva la insuficiencia respiratoria aguda es un predictor de éxito de la VMNI, siendo la agudización de EPOC y el edema agudo de pulmón de causa cardiogénica las causas con mejor respuesta a esta técnica [237]. Ambas son patologías de rápida resolución al compararlas con otras causas con mayor porcentaje de fracaso de la VMNI como son la neumonía [235,238] o el SDRA [233].

### 13.1.3. Fracaso en función del tiempo de VMNI

Según el tiempo transcurrido desde el inicio de la VMNI se describen tres tipos de fracaso [239].

Fracaso inmediato: ocurre dentro de la primera hora de inicio de la VMNI. Suele ser debido a incapacidad de manejo de secreciones, a intolerancia de la técnica (p.e. por claustrofobia), a mala sincronía con el respirador [240] y a encefalopatía con confusión, agitación o coma.

Fracaso precoz: ocurre entre 1 y 48 horas de iniciada la VMNI, siendo el tipo de fracaso más frecuente. En la IRA hipoxémica se ha asociado a mayores índices de gravedad inicial, y se caracteriza por la incapacidad de conseguir  $\text{PaO}_2/\text{FiO}_2 > 150$  mm Hg, persistencia de taquipnea ( $>30$  respiraciones/minuto) o empeoramiento de los infiltrados en la radiografía de tórax. En la insuficiencia respiratoria hipercápnica se caracteriza por la incapacidad en conseguir  $\text{pH} > 7,25$ , aumento de la taquipnea, bajo nivel de consciencia, y se puede asociar a signos analíticos de infección activa, mal estado nutricional o índices de gravedad elevados.



**Fracaso tardío:** el fracaso se produce después de las primeras 48 h. Son pacientes con una buena respuesta inicial a la VMNI y que presentan un deterioro tardío. Éste se relaciona con la aparición de infección nosocomial [241], con delirio o con alteraciones del sueño [242].

#### 13.4. Acciones terapéuticas en el fracaso de la VMNI

La falta de respuesta o el empeoramiento clínico o gasométrico de los pacientes con VMNI debe seguirse de un cambio de estrategia terapéutica temprana a fin de no retrasar la intubación endotraqueal en caso de que esté indicada. De hecho, el clínico debe tener en cuenta que cualquier retraso innecesario de la intubación puede incrementar la mortalidad. Dicho esto, las acciones que pueden emprenderse para intentar tratar el fracaso sin recurrir a la IOT, en primer lugar, hay que revisar el tratamiento médico administrado, así como descartar la presencia de alguna complicación como neumotórax, broncoaspiración o desarrollo de insuficiencia cardíaca. Hay diferentes acciones terapéuticas que podemos considerar antes de determinar el fracaso firme de la técnica [232,243]:

**Elección del respirador:** la elección del respirador puede ser un factor importante para el éxito de la VMNI, los respiradores específicos para VMNI han demostrado conseguir mejor sincronía entre paciente y respirador [236].

**Valoración de las fugas y elección de la interfase:** la tolerancia de la interfase utilizada es crucial para el éxito de la técnica. Debe comprobarse el sellado de la interfase y valorar que no haya un exceso de fuga. En la mayoría de estudios con pacientes con insuficiencia respiratoria aguda se utilizan máscaras oronasales, aunque también se han utilizado máscaras faciales o el *helmet* con éxito [244,245] El cambio de la interfase puede ser un recurso efectivo ante un fracaso inicial de la VMNI [246].

### **Cambios de parámetros ventilatorios o del modo ventilatorio:**

En pacientes con acidosis respiratoria y aumento del trabajo respiratorio, en caso de no conseguir disminuir la  $\text{PaCO}_2$  debe modificarse los parámetros programados aumentando la presión inspiratoria hasta valores próximos a los 20 cm  $\text{H}_2\text{O}$ . Ante una persistencia de  $\text{PaCO}_2$  elevada deben revisarse las conexiones del circuito y comprobar la correcta posición de la válvula espiratoria para evitar la reinhalación de aire espirado. Ante una falta de respuesta de la VMNI con modalidades asistidas en pacientes con encefalopatía hipercápnica, puede cambiarse a una modalidad mixta asistida/controlada con frecuencia de rescate variable. Un aumento cuidadoso de la frecuencia respiratoria mínima programada puede mejorar los resultados en estos casos [247].

En pacientes con insuficiencia respiratoria hipoxémica refractaria puede incrementarse el valor de PEEP (o EPAP). En este tipo de pacientes, si la modalidad inicial aplicada es CPAP, puede valorarse el cambio a una modalidad con asistencia inspiratoria para reducir el trabajo respiratorio [248].

**Sedo-analgesia controlada:** en pacientes con mala adaptación a la VMNI (por claustrofobia, agitación, desorientación o disconfort), y después de haber fracasado con las medidas no farmacológicas anteriormente mencionadas, se puede recurrir al uso de sedoanalgesia estrechamente monitorizada para mejorar la tolerancia a la técnica [249,250]. Algunos autores, basándose en la experiencia reciente de la pandemia por SARS-CoV2 proponen el uso de opioides para disminuir el impulso respiratorio, aunque no existe evidencia suficiente en este sentido para emitir una recomendación [251]

**Fisioterapia respiratoria:** en situación de insuficiencia respiratoria aguda inicial no es recomendable la realización de fisioterapia respiratoria, especialmente en caso de asociarse a broncoespasmo. Los pacientes con broncorrea sin capacidad para



expectorar de forma eficaz no deberían mantenerse con VMNI. En función de la situación clínica del paciente se debería valorar técnicas de fisioterapia para favorecer la expectoración.

**Cambio a otra asistencia respiratoria no invasiva:** no hay estudios que demuestren que la oxigenoterapia mediante TAFCN en la IRA hipoxémica pueda ser un tratamiento de rescate de la VMNI. Asimismo, es importante recordar que en pacientes hipoxémicos y cuando la causa es un distrés respiratorio agudo se prefiere el uso de la TAFCN pero si en una hora la frecuencia respiratoria no está por debajo de 30 rpm no debe retrasarse la intubación [20,252].

**Intubación endotraqueal:** la decisión de intubar se rige principalmente por criterios clínicos más que gasométricos. Ante cualquiera de los criterios mayores expuestos en la tabla 3 debe procederse a la intubación. Además, la presencia de dos de los siguientes criterios menores durante la primera hora de tratamiento también debe hacer plantear la intubación endotraqueal:

- (1) Frecuencia respiratoria > 35 rpm o superior a su valor inicial.
- (2) pH < 7,30 o inferior al valor de inicio, o PaCO<sub>2</sub> > 20% respecto al valor inicial.
- (3) PaO<sub>2</sub>/FiO<sub>2</sub> < 150 mm Hg.
- (4) Empeoramiento de la encefalopatía hipercápnica.

## 14. Criterios de retirada de la VMNI/TAFCN tras control del fallo respiratorio agudo

### 14.1. Retirada de la VMNI

#### 14.1.1. En la EPOC agudizada

La normalización del pH y una  $\text{PaCO}_2 < 50$  mm Hg son parámetros comúnmente usados para la interrupción de la VMNI, si bien restaurar la función del centro respiratorio requiere más tiempo para normalizar la  $\text{PaCO}_2$  que para corregir la acidosis.

La duración óptima de la VMNI en el período inicial y la forma más efectiva de retirarla a medida que el paciente mejora ha sido objeto de debate. A medida que disminuye el trabajo respiratorio y revierte la hiperinsuflación pulmonar dinámica con el tratamiento médico de la agudización, tiende a normalizarse la ventilación espontánea. Cuanto mayor es la relevancia de la infección como causa precipitante de hipercapnia aguda, más probable es la reversión completa del proceso, pero en algunos pacientes no es posible normalizar la  $\text{PaCO}_2$ , especialmente en aquellos con evidencia de hipercapnia crónica al ingreso.

En la mayoría de los estudios, el objetivo suele ser tratar con VMNI la mayor parte del tiempo durante las primeras 24 h. Sin embargo, el tiempo real en que los pacientes permanecen bajo VMNI suele ser menor de lo planeado, desde una mediana de 20 h en un estudio [34] hasta 7 h en otro [253]. La práctica clínica habitual suele ser la de reducir gradualmente tiempo de VMNI, con períodos cada vez más prolongados

de respiración espontánea durante el día, mientras se continúa con VMNI durante la noche. La monitorización de la  $\text{PaCO}_2$  con y sin VMNI es una medida útil para decidir la rapidez para retirar la VMNI. Una reducción gradual de las presiones del ventilador, intentado ajustar las condiciones del ventilador para mejorar el confort del paciente es importante y es un reflejo de la recuperación del paciente. En aquellos pacientes con una causa infecciosa de la agudización menos evidente y/o evidencia de hipercapnia crónica, deben evaluarse otros factores causales como insuficiencia cardíaca asociada, apnea obstructiva del sueño o hipoventilación asociada a obesidad. En estos casos puede ser beneficioso utilizar la VMNI durante periodos de tiempo más prolongados que los convencionales [254].

Dos estudios recientes han mostrado, sin embargo, que la prolongación de la VMNI nocturna después de la recuperación de un episodio de agudización hipercápnica no es eficaz en prevenir recaídas posteriores de insuficiencia respiratoria aguda hipercápnica, reingreso hospitalario o mortalidad en pacientes con EPOC agudizada sin indicación previa de ventilación domiciliaria [255,256], y ocasiona una estancia más prolongada en cuidados intermedios. Estos estudios sugieren que en estos pacientes se puede retirar la VMNI directamente cuando el episodio agudo se resuelve, se normaliza el pH y mejora tanto la  $\text{PaCO}_2$  como la condición clínica general, con tolerancia de la respiración espontánea sin soporte ventilatorio [257].

#### 14.1.2. En enfermedades neuromusculares y de la caja torácica

La recuperación generalmente es más tardía que en la EPOC agudizada, por lo que la retirada de la VMNI debería hacerse más lentamente, y continuar con VMNI durante la noche. Cuanto mayor sea la concentración de  $\text{HCO}_3^-$  al ingreso, mayor será el período de soporte ventilatorio necesario requerido para reducir el grado de alcalosis metabólica compensatoria. Se recomienda como objetivo alcanzar  $\text{PaCO}_2$  alrededor de 45-50 mm Hg en respiración espontánea. Tras la resolución del episodio, la mayor parte de pacientes con enfermedades neuromusculares o de la caja torácica va a

requerir VMNI domiciliaria. Ésta se debe continuar durante la noche mientras hasta vincular al paciente con un servicio de ventilación crónica domiciliaria.

#### 14.1.3. En el Síndrome de Hipoventilación-Obesidad

Aunque no hay evidencia en este tipo de pacientes, la retirada de la VMNI en vigilia debería hacerse como en la EPOC agudizada, aunque en este caso es recomendable continuar con la VMNI durante la noche. Después de un episodio de IRCA hipercápnica debería evaluarse siempre la posible indicación de ventilación nocturna domiciliaria a largo plazo, bien ventilación no invasiva o CPAP. Además, habría que considerar la posible indicación de cirugía bariátrica y la configuración óptima de los parámetros ventilatorios en domicilio como parte del abordaje de estos pacientes.

#### 14.2. Retirada de la TAFCN

Es difícil establecer pautas para el destete de la TAFCN y su sustitución por un sistema de oxigenoterapia convencional. Sin embargo, parecería razonable primero disminuir la  $\text{FiO}_2$  y, posteriormente, el flujo. Los estudios clínicos aleatorizados utilizan como criterios de retirada de la TAFCN la mejoría de los signos de dificultad respiratoria ( $\text{FR} < 25 \text{ rpm}$ ) y la gravedad de la hipoxemia en base a la  $\text{PaO}_2/\text{FiO}_2$  [67,70].



## 15. Criterios para continuar con ventilación domiciliaria a largo plazo

El número de pacientes que tras recibir VMNI en una situación aguda son tratados posteriormente con ventilación mecánica domiciliaria (VMD), se ha incrementado progresiva y significativamente en los últimos años.

En muchas ocasiones la ventilación aguda no es más que el escenario final de patologías muy prevalentes que permanecen infradiagnosticadas en la población general (SHO , Síndrome de apneas-hipopneas durante el sueño –SAHS-...) y/o de patologías con criterios previos de VMD (enfermedades neuromusculares, enfermedades restrictivas..) [258], que por diferentes motivos debutan de forma aguda.

En este sentido para decidir la derivación a una unidad de VMD debe considerarse si la VMNI instaurada de forma aguda pertenece al grupo de pacientes en los que ya existían criterios previos de VMD, o es el proceso agudo y su posterior evolución el que motiva la indicación de VMD.

A continuación, se sintetizan las situaciones más prevalentes que pueden requerir VMD tras la VMNI en situación aguda.

### 15.1. EPOC con hipercapnia tras retirada VMNI

La persistencia de hipercapnia después del alta hospitalaria en pacientes con EPOC que han requerido el uso de VMNI en situación aguda está asociado con un alto riesgo de reingreso y un incremento de la mortalidad [259,260]. No obstante, la indicación de VMD en estos pacientes sigue siendo controvertida en el momento actual y requiere de estudios adicionales para confirmarla. Dos publicaciones recientes avalan la indicación de VMD una vez superado el episodio agudo [261,262]



con resultados positivos en términos de reducción de mortalidad, reingresos hospitalarios y mejoría de la calidad de vida. Por el contrario, el estudio RESCUE trial [263] no encontró resultados positivos en el grupo con VMD. Uno de los estudios [261] sustenta la indicación de VMD en pacientes que se encuentran en situación estable estadio IV GOLD. Por el contrario, un estudio más reciente [262] establece las indicaciones de VMD tras una exacerbación severa que permanecen hipercápnicos ( $> 56$  mm Hg) tras 2-4 semanas del alta hospitalaria, que sería la misma recomendación que establecen unas guías clínicas de reciente publicación[264].

Probablemente la diferente selección de pacientes (mayor nivel de hipercapnia y gravedad en los que encuentran beneficio) condicionan los resultados positivos de estos estudios y a la espera de nuevas evidencias estos datos resultan claves para identificar a los potenciales candidatos a VMD: pacientes EPOC en estadios avanzados con hipercapnia grave tras la retirada de VMNI. El momento de decidir la VMD no tiene porqué realizarse durante el ingreso, por ello es indispensable un seguimiento posterior al alta que permita detectar al grupo de pacientes que puede beneficiarse de VMD.

La existencia de otras comorbilidades, como la obesidad, añaden un componente de hipoventilación a la situación de fatiga diafragmática permanente en la que se encuentran estos pacientes. Así mismo puede añadirse la co-existencia de EPOC y SAHS [265] por lo que en ambas situaciones se debería remitirse a una Unidad de Sueño una vez recuperada la estabilidad clínica.

## 15.2. SAHS vs SHO

A menudo pacientes sin EPOC son portadores de un SHO y/o SAHS sin diagnóstico ni tratamiento previo que debutan con una insuficiencia respiratoria aguda precipitada por diferentes situaciones: infecciones respiratorias, actos quirúrgicos, ingesta medicación depresora del SNC etc... Una vez resulta la situación aguda debe considerarse la necesidad de VMD o CPAP según estudio de sueño y evolución [266].

Del mismo modo pacientes en tratamiento previo con CPAP pueden requerir cambio a VMNI durante un proceso agudo y deben ser remitidos a una unidad sueño y/o de ventilación para valorar mantener la VMD.

15.3. Enfermedades restrictivas (alteraciones caja torácica, patología diafragmática, enfermedades neuromusculares lenta o rápidamente progresivas, etc.)

Las enfermedades restrictivas cualquiera que sea su etiología suelen progresar hacia una situación de hipoventilación que requerirá tratamiento con VMD [258].

Los pacientes portadores de patologías restrictivas como la cifoescoliosis o afectos de enfermedades neuromusculares como la Esclerosis Lateral Amiotrófica, Distrofia Miotónica de Steinert o enfermedad de Duchenne, entre otras, conducen a una insuficiencia rápida o lentamente progresiva que pueden debutar o empeorar súbitamente manifestándose como una IRA que requerirá VMNI y posteriormente VMD.

En este grupo de pacientes es indispensable la derivación y el seguimiento posterior del soporte ventilatorio y otras ayudas respiratorias si precisara (asistente de tos etc.).

## 15.2. VMNI en situación paliativa

La patología respiratoria crónica en fase terminal, así como enfermedades de diferentes etiologías en fase paliativa puede requerir VMNI en situación aguda [54,267]. Una vez superada la misma podemos encontrarnos en un escenario donde la VMD puede ser una opción válida para mejorar la disnea y la calidad de vida como se

## Documento Español de Consenso sobre la utilización del Soporte Respiratorio No Invasivo en el paciente con Insuficiencia Respiratoria Aguda grave

sugiere en la reciente guía de la ERS/ATS [41]. La decisión de mantener la ventilación debe ser individualizada en cada paciente y consensuada entre las partes implicadas (paciente, familia y profesionales sanitarios) asumiendo que, si bien no va a modificar la evolución final de la enfermedad, puede ofrecer un incremento en la supervivencia deseada por el paciente.

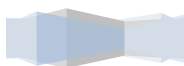

## 16. Seguimiento específico en pediatría

### 16.1. Evaluación de la eficacia de la VMNI

Los objetivos no difieren esencialmente de los del paciente adulto, debiendo establecerse una vigilancia continua clínica y funcional del paciente, especialmente durante las primeras 4-6 horas, siendo recomendable el ingreso en unidad con vigilancia continua hasta que se observe mejoría y progresiva estabilidad del paciente. Deben monitorizarse además del confort, el trabajo respiratorio, dinámica respiratoria, excursión torácica, frecuencia respiratoria (FR), y frecuencia cardíaca (FC), según las tablas adjuntas 15 y 16, así como vigilancia del nivel de conciencia con la escala de Glasgow modificada para lactantes (tabla 17). También debe procederse a una monitorización discontinua de ciertos parámetros como tensión arterial (TA), auscultación cardiorrespiratoria o radiología torácica. En cuanto a su interpretación, existen una serie de matices a tener en cuenta [174,175]:

- Es especialmente importante la monitorización del nivel de conciencia, ya que una disminución del mismo en el contexto de una IRA es indicación casi siempre de IOT.
- La FR espontánea deberá disminuir si el SRNI es efectivo, teniendo en cuenta que la FR normal cambia de acuerdo con la edad y que una bradipnea en el contexto de IRA es casi siempre indicación de IOT.
- Tanto el trabajo respiratorio como la FC (respuesta fisiológica a la hipoxemia) deben disminuir con un adecuado soporte.
- La monitorización del ECG es imprescindible en presencia de cardiomiopatía y recomendable en todas las circunstancias agudas para detectar de forma rápida eventuales arritmias

Documento Español de Consenso sobre la utilización del Soporte Respiratorio No Invasivo en el paciente con Insuficiencia Respiratoria Aguda grave

| Edad            | Frecuencia respiratoria (rpm) |
|-----------------|-------------------------------|
| 0 - 6 meses     | 30 – 50                       |
| 6 meses – 1 año | 20 – 40                       |
| 1 – 2 años      | 20 – 30                       |
| 2 – 6 años      | 15 – 25                       |
| 6 – 10 años     | 15 – 20                       |
| Más de 10 años  | 13 - 15                       |

*Tabla 15. Tabla de frecuencia respiratoria por edad.*

| Edad           | Frecuencia cardíaca (lpm) |
|----------------|---------------------------|
| Recién nacido  | 110 – 160                 |
| 1 – 2 años     | 100 – 150                 |
| 2 – 5 años     | 95 – 140                  |
| 5 – 12 años    | 80 – 120                  |
| Más de 12 años | 60 – 100                  |

*Tabla 66. Frecuencia cardíaca por edad.*



## Documento Español de Consenso sobre la utilización del Soporte Respiratorio No Invasivo en el paciente con Insuficiencia Respiratoria Aguda grave

| Apertura de ojos | Respuesta verbal               | Respuesta motora        | Puntos |
|------------------|--------------------------------|-------------------------|--------|
|                  |                                | Movimientos espontáneos | 6      |
|                  | Balbuceo                       | Retirada al tocar       | 5      |
| Espontánea       | Llanto Irritable<br>Consolable | Retirada al dolor       | 4      |
| A la voz         | Llanto al dolor                | Flexión anormal         | 3      |
| Al dolor         | Quejidos al dolor              | Extensión anormal       | 2      |
| Ninguna          | Ausencia                       | Ninguna                 | 1      |

Tabla 7. Glasgow modificado para lactantes.

*Glasgow leve entre 13-15; Glasgow moderado entre 9-12; Glasgow grave menos de 9*

- Parámetros gasométricos.
  - *Oxigenación:* Cuando se aplica una técnica de SRNI en niños se deberá mantener una monitorización continua de la SpO<sub>2</sub>, ya que no se suelen realizar gasometrías arteriales seriadas, a menos de disponer de una arteria canalizada. En la práctica para vigilar la oxigenación se utiliza la monitorización continua de la saturación de oxígeno de la hemoglobina (SatO<sub>2</sub>) en sangre arterial, por pulsioximetría y se calcula el índice SatO<sub>2</sub>/fracción inspirada de oxígeno. La gasometría arterial estaría indicada únicamente si el mencionado cociente no mejora con SRNI y especialmente en presencia de SDRA. La medición de presión transcutánea de oxígeno de forma continua y no invasiva es fiable solo

si hay estabilidad hemodinámica y podría complementar la  $\text{SatO}_2$  para el control de la hipoxemia.

- *Ventilación:* en la práctica, para vigilar la ventilación se utiliza la medición intermitente de la presión parcial de dióxido de carbono ( $\text{PCO}_2$ ) venoso o capilar o la monitorización continua de la  $\text{PCO}_2$  transcutánea o del dióxido de carbono espirado ( $\text{EtCO}_2$ ), teniendo en cuenta las limitaciones de dicha técnica si se utilizan sistemas de VMNI con fuga incorporada. Recientemente la monitorización transcutánea de  $\text{PaO}_2$  y  $\text{PaCO}_2$  aporta interesantes alternativas no invasivas a la práctica clínica.

Teniendo en cuenta lo anteriormente expuesto, los criterios clínicos de mejora serán la disminución de FC, FR, del trabajo respiratorio (disnea) y de la actividad de los músculos respiratorios accesorios, en aproximadamente 1-2 horas desde el inicio de la VMNI. Se usan también una serie de escalas de dificultad respiratoria (Pulmonary Score, Wood-Dowes, Tussing, etc) para valorar la evolución. Por lo que respecta a los criterios gasométricos, debe detectarse una disminución de  $\text{PaCO}_2$  en el IRA hipercápnica y disminución de las necesidades de  $\text{FiO}_2$  en el IRA hipoxémica a las 2 horas de iniciar la VMNI.

Al igual que en el adulto, puede ser de utilidad el control de las gráficas del ventilador a fin de detectar y corregir asincronías. Ello incluye también la monitorización de las fugas. Solo destacar que con frecuencia las estimaciones de VT son más imprecisas de lo que ocurre en adultos por encontrarse las determinaciones en el límite inferior de las posibilidades de mediciones del equipo. A nivel orientativo, si las fugas son inferiores a 7 lpm probablemente la mascarilla esté demasiado apretada y pueden aparecer lesiones por presión. Si las fugas son demasiado elevadas pueden producir conjuntivitis y sequedad. Una fuga adecuada es en general inferior a



Documento Español de Consenso sobre la utilización del Soporte Respiratorio No Invasivo en el paciente con Insuficiencia Respiratoria Aguda grave

30 lpm (intencional + no intencional) aunque puede variar en función del respirador y de la interfase.

Por último, es importante, asimismo, el control de los posibles efectos adversos, como la vigilancia clínica de las zonas de apoyo de la mascarilla (especialmente en el puente nasal), protección con apósitos hidrocoloides, masajear en los descansos la zona de apoyo, rotar las interfaces, usar aceites protectores o similares y control de la distensión gástrica, con uso de sonda nasogástrica de descompresión especialmente en los más pequeños. Las principales complicaciones se recogen en la tabla 18.

| Problema                                                   | Solución                                                                                                                              |
|------------------------------------------------------------|---------------------------------------------------------------------------------------------------------------------------------------|
| Dermatitis irritativa en la zona del surco nasogeniano     | Uso puntual de cremas coloides para aliviar las molestias                                                                             |
| Necrosis cutánea más frecuente en la zona del puente nasal | Rotación de mascarillas, alivio de la presión con frecuencia horaria durante 1 minuto, uso de forma preventiva spray de ácidos grasos |
| Conjuntivitis irritativa                                   | Más frecuentes en niños con lagofthalmos, minimizar las fugas y poner protecciones que sellen los párpados                            |
| Obstrucción de la interfase o de la vía aérea              | Tubos nasofaríngeos pequeños obstruidos por secreciones                                                                               |
| Claustrofobia                                              | Puede ser debida a mascarilla demasiado apretada o falta de visión                                                                    |
| Distensión gástrica                                        | Presiones inspiratorias superiores a 25 cm H <sub>2</sub> O<br>Colocación de sonda nasogástrica                                       |
| Aspiración alimentaria                                     | Utilizar alimentación por sonda transpilórica                                                                                         |
| Neumotórax (raro)                                          | Si ocurre valorar colocar tubo de drenaje y continuar con la técnica                                                                  |
| Obstrucción vía aérea por secreciones                      | Defecto de humidificación                                                                                                             |



*Tabla 8. Complicaciones que pueden comprometer la eficacia de la VMNI en el paciente pediátrico.*

## 16.2. Análisis del fracaso de la VMNI

Los factores predictivos más importantes de fracaso en VMNI en el paciente pediátrico son la gravedad de la hipoxemia, la edad del paciente y el trabajo respiratorio. La persistencia de hipoxemia y/o de dificultad respiratoria, sin cambio significativo tras dos horas de técnica adecuada son factores que auguran la necesidad de intubar al paciente, con transición a ventilación mecánica convencional. Relacionado con la patología subyacente, la mejor respuesta a la VMNI la encontramos en pacientes con bronquiolitis aguda e infecciones respiratorias en pacientes neuromusculares sin criterios de SDRA.

Por lo tanto, los factores fundamentales a tener en cuenta, especialmente en las primeras 4-6 horas de VMNI del paciente pediátrico son las siguientes:

- Incapacidad de mejorar los síntomas o deterioro del paciente. Así, la FC y FR deben ser, acorde a la edad del paciente, inferiores a cuando se inició la técnica, en ausencia de situaciones de dolor o fiebre. Una persistencia de la FR por encima de 2 desviaciones estándar con respecto a lo normal por la edad del paciente sería un signo de mal pronóstico, así como persistencia de la taquicardia que no se explica con otra causa (fiebre, dolor, etc.).
- Presencia de inestabilidad hemodinámica
- Aumento de la necesidad de oxígeno que se traducirá en una disminución del cociente  $SpO_2/FiO_2$  [111,174,179].
- Asincronía con el respirador.
- Persistencia de alteraciones gasométricas (pH y  $pCO_2$ ).
- Desarrollo de complicaciones no manejables en VMNI (secreciones abundantes, hipoxemia grave, descenso del nivel de consciencia, alteraciones hemodinámicas).



- Rechazo del tratamiento o deseo de suspensión del mismo por parte de los padres o tutores.

El fracaso de la VMNI en un episodio de IRA casi siempre lleva a la intubación del paciente, a no ser que esta hubiera sido descartada con anterioridad. En este tipo de pacientes, la ineficiencia de la VMNI en paliar la disnea deberá conducir a instaurar otros tratamientos [174,268]. En este sentido hay que tener en cuenta que en pediatría la TAFCN no ha demostrado ser superior a la VMNI, considerando todos los posibles escenarios. Sin embargo, la CPAP ha demostrado su utilidad como tratamiento de rescate del fracaso de la TAFCN en la bronquiolitis aguda [269,270]. Sólo en circunstancias aisladas, por ejemplo en pacientes intolerantes a la VMNI, puede utilizarse TAFCN buscando un mayor confort del paciente [122,271,272].

### 16.3. Discontinuación

La duración óptima de la VMNI en la IRA asociada a bronquiolitis aguda o crisis graves de asma dependerá de la evolución del proceso infeccioso en el primer caso y de la respuesta al tratamiento broncodilatador en el segundo. Así, las infecciones víricas con evolución favorable (sin SDRA) suelen presentar una resolución en 10-15 días, siendo los primeros 5 -7 días los de mayor probabilidad de necesitar SRNI, que podrá retirarse de forma progresiva. En caso de no existir patología subyacente, no será necesario mantener VMNI durante el sueño. En las crisis de asma sin infección concomitante y con buena respuesta a corticoides sistémicos la VMNI suele mantenerse por espacio de 48-72 horas y la retirada puede ser de forma más rápida

En pacientes con patología neuromuscular o con alteraciones restrictivas de la caja torácica es muy frecuente que el episodio de IRA ponga de manifiesto la necesidad de una ventilación prolongada en el contexto de una insuficiencia respiratoria crónica (IRC) más o menos compensada en ausencia de infecciones. Habitualmente la retirada de la VMNI se hace más lentamente, con la finalidad de mantener una ventilación diurna normal, sin oxígeno suplementario, y manteniéndola en sueño durante varias

semanas, hasta completar estudios de función respiratoria basal. Para una retirada progresiva, por ejemplo, en pacientes neuromusculares, se reduce progresivamente la asistencia respiratoria hasta una presión de soporte de 4-6 cmH<sub>2</sub>O sobre EPAP, que a su vez se mantiene entre 5 y 7 cmH<sub>2</sub>O. Es importante que la FiO<sub>2</sub> necesaria para saturaciones normales fuera del 21% y en cualquier caso no más elevada de la que paciente tuviera antes del episodio de IRA. Comprobada la estabilidad clínica y la ausencia de procesos intercurrentes que pudieran interferir con el éxito del destete se procede a periodos de retirada cada vez más largos, conservando al VMNI en sueño hasta establecer si el paciente es tributario de continuar con VMNI domiciliaria.

En el caso de pacientes que no precisen retirada progresiva, por ejemplo, con bronquiolitis viral aguda o en el caso de insuficiencia respiratoria hipoxémica, debe comprobarse la resolución y/o control de la infección, la ausencia de afectación sistémica por la misma, la ausencia de complicaciones y la necesidad de una asistencia respiratoria mínima: CPAP con FiO<sub>2</sub> inferior al 30% o bien VMNI con EPAP de 5-6 cmH<sub>2</sub>O e IPAP alrededor de 8-10cmH<sub>2</sub>O, y FiO<sub>2</sub> del 25-30%. En esta situación puede retirarse el soporte de forma directa [19].

#### 16.4. Derivación a una unidad de ventilación crónica

En pediatría la mayor parte de la VMNI en paciente agudo se realiza en las UCIP. El paciente que presenta una situación de insuficiencia respiratoria crónica (IRC) ya conocida o una patología a riesgo de IRC, previas al episodio agudo que le ha llevado a recibir VMNI, deberá ser evaluado en una consulta de neumología con conocimiento en la aplicación de VMNI a largo plazo y con manejo de VMNI en domicilio. Así mismo, si durante el destete de la VMNI no se logra progresar y el episodio de insuficiencia respiratoria parece prolongarse en el tiempo, el equipo que realiza la VMNI crónica en pediatría deberá valorar el paciente antes del alta de la UCIP para pasarle a una asistencia por medio de un respirador que pueda ser utilizado en plantas de hospitalización o en domicilio, y progresivamente ir definiendo el tipo de soporte que el paciente vaya a mantener, en función de la situación clínica, la



patología de base, la edad del paciente, las horas del día durante las cuales necesita el soporte, la disponibilidad de material y la experiencia del centro.

## 17. Seguimiento específico en neonatología

### 17.1. Controles de eficacia de la VMNI en el neonato

El principal objetivo de la VMNI y/o CPAP se encamina a conseguir un adecuado reclutamiento pulmonar con una mejoría en las relaciones ventilación/perfusión. Los parámetros más importantes en el seguimiento son los siguientes:

- Oxigenación: la titulación de la CPAP/VMNI debería permitir un control de la  $\text{SpO}_2$  con necesidades de  $\text{FiO}_2$  habitualmente por debajo de 0,4 [273,274]. La saturación de oxígeno del paciente debe estar dentro de los límites correspondientes a su edad gestacional (Tabla 13).
- Ventilación: los controles suelen efectuarse con medición de  $\text{pCO}_2$  en sangre venosa o capilar, aunque existe la posibilidad de monitorización transcutánea de la  $\text{pCO}_2$ . En ocasiones puede tolerarse valores de hipercapnia permisiva, aun con la VMNI, hasta valores de  $\text{pCO}_2$  de 60-65mm Hg, con  $\text{pH} > 7,25$  [273].
- Control clínico: existen escalas de valoración de la dificultad respiratoria, como la puntuación de Silverman, que se basan en datos de la exploración física como la frecuencia respiratoria, la presencia de tiraje sub/intercostal y esternal, etc. En este contexto, el aumento del trabajo respiratorio o el mal control clínico del mismo suele asociarse a inadecuado reclutamiento pulmonar.

- Control radiológico: la radiología torácica puede ayudar a valorar el grado de reclutamiento pulmonar, evitando así presiones que contribuyan a la sobredistensión. También puede ser útil para comprobar la ausencia de atelectasias y/o condensaciones, y, ante la sospecha clínica pertinente, descartar la presencia de aire ectópico [273]. De la misma manera, la ecografía pulmonar también puede tener un papel en el control de los recién nacidos con CPAP/VMNI, aunque requiere formación específica y experiencia del personal para su correcta interpretación [275].

## 17.2. Fracaso de la CPAP/VMNI en neonatología

Ante la sospecha de fracaso de la CPAP/VMNI, además de la comprobación del correcto funcionamiento de todos los componentes del sistema utilizados, es especialmente importante el posicionamiento del paciente con una adecuada alineación de la vía aérea (especialmente en el prematuro).

Los criterios que se consideran indicativos de fracaso en el neonato son los siguientes:

- Criterios clínicos:
  - Necesidad de  $\text{FiO}_2 > 0,4-0,5$  para alcanzar la saturación de oxígeno diana (en función de la edad gestacional y la patología de base).
  - Dificultad respiratoria progresiva o sin mejoría con respecto a la inicial.
  - Pausas de apnea que precisen de estimulación vigorosa con necesidad de ventilación con bolsa y mascarilla, especialmente si se producen  $> 3$  episodios en una hora con desaturación y/o bradicardia.
- Criterios gasométricos:
  - Acidosis respiratoria con  $\text{pH} < 7,25$  con  $\text{pCO}_2 > 60$  mm Hg.



### 17.3. Opciones terapéuticas en caso de fracaso

- Optimización de VMNI:
  - Aumento de PEEP hasta 7-8 cm de H<sub>2</sub>O y de presión inspiratoria.
  - Valorar la transición de CPAP a VMNI.
- Valorar el aumento de respiraciones controladas por minuto en VMNI hasta un máximo de 40 rpm.
- Intubación e inicio de VM si fracasan todas las medidas mencionadas [273,276]

### 17.4. Procedimiento de mantenimiento, complicaciones y discontinuación o retirada de la VMNI

#### 17.4.1. Mantenimiento

El neonato con CPAP/VMNI requiere unos cuidados específicos de enfermería exhaustivos, que son la base del éxito de esta modalidad de soporte respiratorio. El posicionamiento del paciente debe favorecer la expansión torácica y el alineamiento de la vía aérea, facilitando el paso de flujo. Es necesaria la colocación de una sonda orogástrica abierta para evitar la sobredistensión gástrica y en ocasiones es necesario realizar aspiraciones frecuentes de la misma para evacuar el aire acumulado. El paciente no necesariamente debe permanecer en dieta absoluta, se recomienda iniciar la alimentación preferentemente a través de sonda orogástrica.

Es crucial la selección del tamaño más adecuado de interfase para cada paciente, realizando cambios frecuentes de las interfases nasales (binasales-mascarilla nasal) para alternar los puntos de presión. Es útil también colocar protecciones nasales en los puntos de presión identificados para minimizar las lesiones cutáneas. Se recomienda realizar lavados nasales con suero salino fisiológico frecuentes, evitando la aspiración

directa con sonda de las fosas nasales para no causar más daño a la mucosa nasal [277,278].

#### 17.4.2. Complicaciones.

- Obstrucción al paso de flujo, por mal-posición de la interfase y/o acúmulo de secreciones, pudiendo desestabilizar al paciente
- Lesiones tabique nasal y filtrum relacionadas con la presión ejercida por la interfase, pudiendo ser de gravedad variable: leves (enrojecimiento cutáneo), moderadas (erosión) o severas, llegando a producir necrosis tisular de la zona afectada.
- Hundimiento de raíz nasal y maxilar superior secundarios a la presión de los sistemas de fijación, generando deformidades del macizo facial
- Deformidad de las narinas: dilatación y anteversión de las mismas, con asimetría en el caso del uso de interfases mononasales.
- Atrapamiento aéreo y PEEP inadvertida: sobredistensión alveolar que puede empeorar la hipoxemia e hipercapnia.
- Presencia de aire ectópico: neumotórax, neumomediastino, enfisema pulmonar intersticial.
- Sobredistensión de asas intestinales y disminución del flujo sanguíneo gastrointestinal, aunque no se ha relacionado la CPAP/VMNI con perforaciones gástricas ni como desencadenante de enterocolitis necrotizante.



### 17.4.3. Discontinuación/retirada

No existe un protocolo estricto para la retirada de la VMNI. Se aconseja que los requerimientos de oxígeno estén por debajo de 0,4 para mantener una adecuada oxigenación, que no presente apneas y/o bradicardias, y ausencia de trabajo respiratorio [273].

- Retirada de VMNI: disminución progresiva de presión inspiratoria hasta 15 cm de H<sub>2</sub>O, y de la frecuencia respiratoria de seguridad hasta llegar a 10-15 ciclos por minuto. Si esta situación es bien tolerada se puede considerar el paso a CPAP nasal.
- Retirada de CPAP. En general se realiza una disminución gradual de la presión de la CPAP hasta 5 cm de H<sub>2</sub>O, y FiO<sub>2</sub> menor de 0,3. Una vez alcanzada esta situación se procede a la retirada de la CPAP, pasando el paciente a TCO, o bien a TAFCN en función de su situación clínica. No hay evidencia clínica que apoye que el método de desconexiones periódicas de la CPAP o la disminución de presión desde 5 cm de H<sub>2</sub>O hasta 2 cm de H<sub>2</sub>O o menos, sean superiores al de retirada brusca de la CPAP [276,278].
- Retirada de TAFCN: no existen pautas específicas para el destete de la TAFCN y su sustitución por un sistema de TCO. Sin embargo, parece razonable disminuir en primer lugar la FiO<sub>2</sub> y, posteriormente, el flujo. Una recomendación aceptable podría ser la de mantener el flujo administrado hasta alcanzar una oxigenación correcta con una FiO<sub>2</sub> menor de 0,3. La reducción en el flujo debería ser lenta (1 L/min cada 6-8h). Finalmente, cuando el paciente presente una oxigenación correcta con 2 L/min o menos y con una FiO<sub>2</sub> menor de 0,3 se puede plantear la sustitución de la TAFCN por un sistema de oxigenoterapia convencional.



## 18. Complicaciones asociadas al SRNI

Las complicaciones más frecuentes de la VMNI, junto con sus métodos de resolución, correspondientes se resumen en la tabla 19 [277,279–283]

| Complicación                                   | Actuación                                                                                                                                                                                                                                                                                                                                  |
|------------------------------------------------|--------------------------------------------------------------------------------------------------------------------------------------------------------------------------------------------------------------------------------------------------------------------------------------------------------------------------------------------|
| Sequedad/ irritación de la mucosa respiratoria | <ul style="list-style-type: none"> <li>• Uso de humidificador activo.</li> <li>• Ajuste de presiones y FiO<sub>2</sub></li> </ul>                                                                                                                                                                                                          |
| Úlcera por presión                             | <ul style="list-style-type: none"> <li>• Adecuada elección de interfase</li> <li>• Uso de protectores acolchados e hidrocoloides</li> <li>• Aceites con ácidos grasos hiperoxigenados</li> <li>• Hidratación cutánea</li> <li>• Descansos breves de la VMNI</li> <li>• Adecuado nivel nutricional</li> </ul>                               |
| Distensión gástrica                            | <ul style="list-style-type: none"> <li>• Bajar presiones si es posible</li> <li>• Posición en sedestación</li> <li>• Sonda nasogástrica</li> </ul>                                                                                                                                                                                         |
| Otitis y sinusitis                             | <ul style="list-style-type: none"> <li>• Adecuada eliminación de secreciones, humidificación activa.</li> <li>• Maniobras de Valsalva</li> </ul>                                                                                                                                                                                           |
| Conjuntivitis                                  | <ul style="list-style-type: none"> <li>• Control de fugas</li> </ul>                                                                                                                                                                                                                                                                       |
| Dolor torácico                                 | <ul style="list-style-type: none"> <li>• Analgesia</li> </ul>                                                                                                                                                                                                                                                                              |
| Acúmulo de secreciones                         | <ul style="list-style-type: none"> <li>• Tratamiento enfermedad de base</li> <li>• Humidificación activa</li> <li>• Promover la tos voluntaria</li> <li>• Provocar el reflejo de la tos (presión traquea en hueco supraesternal)</li> <li>• Asistentes de tos</li> </ul>                                                                   |
| Agitación e intolerancia a la VMNI             | <ul style="list-style-type: none"> <li>• Asegurar buen funcionamiento de ventilador</li> <li>• Asegurar conexiones, tubuladura e interfase</li> <li>• Asegurar correcta posición del paciente (sedestación)</li> <li>• Control de fugas y asincronías</li> <li>• Si ansiedad: tranquilizar al paciente y valorar sedación suave</li> </ul> |
| Barotrauma                                     | <ul style="list-style-type: none"> <li>• Evitar presiones excesivas</li> <li>• Si se produce, valorar colocación de drenaje intercostal y continuar o no con la VMNI</li> </ul>                                                                                                                                                            |

Documento Español de Consenso sobre la utilización del Soporte Respiratorio No Invasivo en el paciente con Insuficiencia Respiratoria Aguda grave

| Complicación                       | Actuación                                                                                                                                                                                                                          |
|------------------------------------|------------------------------------------------------------------------------------------------------------------------------------------------------------------------------------------------------------------------------------|
| <b>Neumonía y broncoaspiración</b> | <ul style="list-style-type: none"> <li>• Adecuado manejo de secreciones</li> <li>• Interfases de rápida desconexión en caso de vómito</li> <li>• Vigilar nivel de conciencia</li> </ul>                                            |
| <b>Alteraciones hemodinámicas</b>  | <ul style="list-style-type: none"> <li>• Aumento de volemia: uso de cristaloides o coloides</li> <li>• Disminución del soporte ventilatorio: presiones y frecuencia respiratoria</li> <li>• Uso de fármacos vasoactivos</li> </ul> |

Tabla 19. Complicaciones durante la VMNI y cómo resolverlas [277,279,283–286].

Por lo que se refiere a la TAFCN, las complicaciones son hasta el momento escasas y poco reflejadas en la literatura, siendo las más frecuentes las siguientes:

- Dolor torácico autolimitado al inicio de la técnica.
- Cefalea.
- Intolerancia al calor: los modernos dispositivos permiten regular la temperatura a valores de 31-34-37º C.
- Epistaxis.
- Intolerancia al ruido, especialmente en los dispositivos más antiguos.
- Sinusitis: igual que la epistaxis, será conveniente la adecuada hidratación de la mucosa de fosas nasales que contacta físicamente con las cánulas.
- Neumotórax: descrito en neonatología.
- Ulceras por presión en zonas de contacto por el uso prolongado de la técnica; fundamentalmente en surco subnasal y pómulos, siendo la estrategia preventiva la misma que en la VMNI.
- Aspiración de líquido de condensación desde tubuladura y quemaduras causadas por la misma, relacionadas con fungible de mala calidad.

En la tabla 20 se reflejan los efectos secundarios atribuibles a TAFCN reflejados en un estudio reciente sobre tratamiento en 44 pacientes con insuficiencia cardiaca crónica agudizada con disnea y/o hipoxemia a la oxigenoterapia convencional [150].

Documento Español de Consenso sobre la utilización del Soporte Respiratorio No Invasivo en el paciente con Insuficiencia Respiratoria Aguda grave

- Intolerancia al calor (la más frecuente).
- Falta de confort acústico.
- Dolor torácico retroesternal autolimitado.
- Cefalea.
- Sensación paradójica de sequedad en mucosa nasal y faríngea.
- Intolerancia al flujo.
- Condensación en la tubuladura.
- Intolerancia a las cánulas.
- Eritema malar.

*Tabla 90. Complicaciones más frecuentes de la TAFCN.*



## 19. Conclusiones

Se han elaborado unas recomendaciones de práctica clínica, resumidas en las tablas 21 a 27, con respecto al uso actual de la VMNI /TAFN para la insuficiencia respiratoria aguda en el paciente adulto y en edad pediátrica y neonatal.

En resumen, el manejo clínico de la insuficiencia respiratoria aguda del enfermo adulto y pediátrico-neonatal debe tener en cuenta la heterogeneidad de los escenarios clínicos con respecto a las indicaciones, estratificación y seguimiento para el empleo de la ventilación no invasiva y de la terapia de alto flujo con cánula nasal. Las recomendaciones recogidas en este documento reflejan por primera vez el grado de acuerdo entre las principales sociedades científicas y proporciona una herramienta de trabajo actualizada para todos los médicos encargados del manejo de los enfermos adultos y pediátricos-neonatales con insuficiencia respiratoria aguda que permiten disminuir la variabilidad clínica en la asistencia de estos enfermos.

Es altamente probable que algunas de estas recomendaciones se modifiquen a lo largo del tiempo con la generación o consolidación del conocimiento científico en este campo, especialmente en lo que respecta al papel de la VMNI y la TAFN frente a otras tecnologías emergentes como la oxigenación y extracción extracorpórea de CO<sub>2</sub>. Es por tanto necesario un enfoque sistemático, dinámico y holístico para mejorar el manejo de este problema tan prevalente y reducir así la importante carga de atención médica en el ámbito hospitalario que permita mejorar los desenlaces clínicos de los enfermos.

# Documento Español de Consenso sobre la utilización del Soporte Respiratorio No Invasivo en el paciente con Insuficiencia Respiratoria Aguda grave

Tabla 21. Recomendaciones de consenso para las indicaciones de SRNI (VMNI) en pacientes en edad adulta

| Contexto clínico                                                                                                                                                                                                                      | Recomendación                                                                        | % opción mayoritaria |
|---------------------------------------------------------------------------------------------------------------------------------------------------------------------------------------------------------------------------------------|--------------------------------------------------------------------------------------|----------------------|
| Ensayo de VMNI en pacientes con signos clínicos de IRA grave sin diagnóstico clínico causal establecido, siempre que se revalore la necesidad de continuar o retirar la VMNI una vez se disponga de los datos diagnósticos necesarios |    | 66 %                 |
| Tratamiento con VMNI en pacientes con IRCA y acidosis respiratoria (pH<7,35) secundarias a exacerbación de EPOC.                                                                                                                      |    | 100%                 |
| VMNI (indistintamente CPAP o presión de soporte) en pacientes con EAP cardiogénico.                                                                                                                                                   |    | 100%                 |
| VMNI en SHO y acidosis respiratoria                                                                                                                                                                                                   |    | 66%                  |
| VMNI en Agudización grave de asma.                                                                                                                                                                                                    |    | 93%                  |
| VMNI en neumonía e IRA hipoxémica en pacientes sin comorbilidad                                                                                                                                                                       |    | 73%                  |
| VMNI en pandemias virales                                                                                                                                                                                                             |   | 73%                  |
| VMNI en neumonía e IRA hipoxémica en pacientes con comorbilidad cardiorrespiratoria                                                                                                                                                   |  | 93%                  |
| VMNI en neumonía en inmunodeprimidos e IRA hipoxémica                                                                                                                                                                                 |  | 66%                  |
| VMNI en distrés respiratorio del adulto e IRA hipoxémica leve                                                                                                                                                                         |  | 60%                  |
| VMNI en distrés respiratorio del adulto e IRA hipoxémica moderada-grave                                                                                                                                                               |  | 86%                  |
| VMNI en pacientes con órdenes de no intubación en grupos donde se ha documentado eficacia                                                                                                                                             |  | 53%                  |
| VMNI como tratamiento coadyuvante para la disnea en pacientes paliativos                                                                                                                                                              |  | 73%                  |
| VMNI en patología restrictiva o neuromuscular con exacerbación de cualquier causa, especialmente infecciosa, a fin de prevenir la aparición de acidosis respiratoria                                                                  |  | 50/50%               |
| VMNI en pacientes con trauma torácico e IRA secundaria                                                                                                                                                                                |  | 66%                  |
| VMNI como técnica de <i>weaning</i> en pacientes con insuficiencia respiratoria hipercápnica e intolerancia a la prueba de respiración espontánea                                                                                     |  | 53%                  |
| VMNI post extubación en pacientes con criterios de riesgo de fracaso                                                                                                                                                                  |  | 71%                  |
| VMNI en IRA post extubación                                                                                                                                                                                                           |  | 71%                  |
| VMNI en la IRA postoperatoria en cirugía abdominal y cardiorrespiratoria                                                                                                                                                              |  | 50/50%               |
| VMNI (CPAP) en prehospitalaria en sospecha de EAP                                                                                                                                                                                     |  | 73%                  |
| VMNI en prehospitalaria en sospecha de agudización de EPOC                                                                                                                                                                            |  | 53%                  |

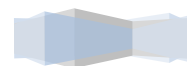

## Documento Español de Consenso sobre la utilización del Soporte Respiratorio No Invasivo en el paciente con Insuficiencia Respiratoria Aguda grave

Tabla 22. Recomendaciones de consenso para las indicaciones de SRNI (VMNI) en pacientes en edad adulta

| Contexto clínico                                                                                                                                                               | Recomendación                                                                         | % opción mayoritaria |
|--------------------------------------------------------------------------------------------------------------------------------------------------------------------------------|---------------------------------------------------------------------------------------|----------------------|
| TAFCN como primera técnica de soporte ventilatorio frente a oxigenoterapia y VMNI en IRA secundaria a neumonía o distrés                                                       |    | 60%                  |
| TAFCN en IRA en inmunodeprimidos frente a VMNI                                                                                                                                 |    | 66%                  |
| TAFCN tras la extubación programada en pacientes sin hipercapnia y con bajo riesgo de reintubación                                                                             |    | 61%                  |
| TAFCN combinada con VMNI para prevenir la reintubación en pacientes con alto riesgo de reintubación                                                                            |  | 53%                  |
| TAFCN como alternativa terapéutica a la VMNI en pacientes postoperados de cirugía cardiorácica con insuficiencia respiratoria postoperatoria o con alto riesgo de reintubación |  | 60%                  |
| TAFCN en pacientes hipoxémicos o con alto riesgo de hipoxemia que van a ser intubados de forma programada                                                                      |  | 50/50%               |
| TAFCN en técnicas endoscópicas.                                                                                                                                                |  | 73%                  |
| TAFCN como método paliativo para tratar la IRA                                                                                                                                 |  | 60%                  |

## Documento Español de Consenso sobre la utilización del Soporte Respiratorio No Invasivo en el paciente con Insuficiencia Respiratoria Aguda grave

Tabla 23. Recomendaciones de consenso para las indicaciones de SRNI en pacientes en edad pediátrica.

| Contexto clínico                                                                                                                                                                                         | Recomendación                                                                                                                                                           | % opción mayoritaria |
|----------------------------------------------------------------------------------------------------------------------------------------------------------------------------------------------------------|-------------------------------------------------------------------------------------------------------------------------------------------------------------------------|----------------------|
| VMNI en IRA global sin contraindicaciones (hipoxemia + hipercapnia) siempre que no existan contraindicaciones                                                                                            |                                                                                      | 84%                  |
| VMNI en pacientes pediátricos con patología neuromuscular, en el destete de la VMI para evitar la reintubación                                                                                           |                                                                                      | 94%                  |
| VMNI en pacientes pediátricos en cualquier situación que comporte alto riesgo de fallo en el destete de la VMI para evitar la reintubación                                                               |                                                                                      | 77%                  |
| VMNI en pacientes pediátricos con IRA hipoxémica moderada (PaO <sub>2</sub> 40-60 mm Hg; saturación 75-90%; PaO <sub>2</sub> /FiO <sub>2</sub> 200-300), sin hipercapnia, sin fallos orgánicos asociados |   | 50%/50%              |
| VMNI en pacientes pediátricos inmunodeprimidos con IRA hipoxémica moderada por neumonía, sin fallo hemodinámico, para evitar la intubación                                                               |                                                                                      | 69%                  |
| VMNI en pacientes pediátricos con IRA moderada o grave asociada a infecciones víricas, principalmente bronquiolitis viral                                                                                |                                                                                      | 77%                  |
| VMNI en pacientes en edad pediátrica con IRA en el contexto de crisis asmática moderada-grave o estatus asmático, para evitar la intubación                                                              |                                                                                    | 82%                  |
| VMNI en pacientes pediátricos con edema agudo de pulmón de causa cardiogénica                                                                                                                            |                                                                                    | 87%                  |
| VMNI en pacientes pediátricos con obstrucción dinámica de la vía aérea superior                                                                                                                          |                                                                                    | 82%                  |
| VMNI en paciente pediátrico con intención de mejorar confort en el contexto de un enfoque paliativo y no estando indicada la intubación orotraqueal                                                      |                                                                                    | 87 %                 |
| La Terapia de Alto Flujo de Cánulas Nasales (TAFCN) como terapia de inicio para bronquiolitis leves-moderadas en planta de hospitalización.                                                              |                                                                                    | 50%                  |
| La TAFCN en planta de pediatría con intención de evitar el escalamiento terapéutico en bronquiolitis leve-moderada.                                                                                      |                                                                                    | 50%                  |
| La TAFCN en cuidados intensivos pediátricos en pacientes con bronquiolitis aguda.                                                                                                                        |                                                                                    | 72 %                 |
| La TAFCN en cuidados intensivos pediátricos en pacientes con broncoespasmo.                                                                                                                              |                                                                                    | 72 %                 |

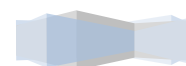

## Documento Español de Consenso sobre la utilización del Soporte Respiratorio No Invasivo en el paciente con Insuficiencia Respiratoria Aguda grave

*Tabla 24. Recomendaciones de consenso para las indicaciones de SRNI en pacientes en edad neonatal.*

| Contexto clínico                                                                                  | Recomendación.                                                                       | % opción mayoritaria |
|---------------------------------------------------------------------------------------------------|--------------------------------------------------------------------------------------|----------------------|
| VMNI preventiva en todos los pacientes prematuros (< 30 semanas de EG) con distrés respiratorio.. |    | 100 %                |
| VMNI tras la extubación y para evitar la reintubación en prematuros de < 30 semanas de EG         |    | 100%                 |
| VMNI en estabilización tras el nacimiento en < 32sem de EG y/o < 1500 gramos de peso.             |    | 100%                 |
| TAFCN en neonatos con insuficiencia respiratoria leve-moderada.                                   |    | 100 %                |
| TAFCN tras la extubación y para evitar la reintubación en el paciente pretérmino > 28 sem de EG   |   | 100%                 |
| TAFCN en el destete del CPAPn                                                                     |  | 100%                 |



## Documento Español de Consenso sobre la utilización del Soporte Respiratorio No Invasivo en el paciente con Insuficiencia Respiratoria Aguda grave

*Tabla 25. Recomendaciones de consenso para el procedimiento y seguimiento del SRNI en pacientes en edad adulta*

| Procedimiento.                                                                                                                                                                                                                                          | Recomendación                                                                         | % opción mayoritaria |
|---------------------------------------------------------------------------------------------------------------------------------------------------------------------------------------------------------------------------------------------------------|---------------------------------------------------------------------------------------|----------------------|
| Estratificación de pacientes candidatos a SRNI. Priorización de ingreso en áreas de intensivos de los pacientes de alto riesgo.                                                                                                                         |    | 93%                  |
| Uso de ventiladores específicos para VMNI en agudos o bien ventiladores de pacientes críticos con módulo de VMNI.                                                                                                                                       |    | 80%                  |
| Las interfases de elección en el paciente agudo adulto son las máscaras nasobucales y faciales totales.                                                                                                                                                 |    | 87%                  |
| La ventilación por presión en modo espontáneo/asistido es el modo de elección en la insuficiencia respiratoria aguda                                                                                                                                    |    | 93%                  |
| Monitorización continua de parámetros fisiológicos durante el procedimiento (FR, FC, SpO <sub>2</sub> )                                                                                                                                                 |    | 93%                  |
| Seguimiento con ayuda del análisis de las curvas de flujo y presión proporcionadas por el ventilador                                                                                                                                                    |    | 67%                  |
| Uso de humidificación activa durante la VMNI                                                                                                                                                                                                            |  | 53%                  |
| Valoración de la eficacia de la VMNI al cabo de una hora de su inicio, siendo la valoración a las 4-6 h un buen indicador del éxito/fracaso de la técnica                                                                                               |  | 93%                  |
| Si no se obtiene respuesta a la VMNI, debe plantearse la interrupción de la técnica de forma precoz y valorar la intubación endotraqueal y ventilación invasiva.                                                                                        |  | 100%                 |
| Retirada directa de la VMNI en pacientes con exacerbación de la EPOC tras la normalización del pH y la mejora de la condición clínica general                                                                                                           |  | 53%                  |
| Evaluación de la continuidad de la VMNI en el SHO agudizado una vez solventado el episodio agudo, ya que muchos pacientes presentan trastorno del sueño de base                                                                                         |  | 73%                  |
| Valoración de ventilación domiciliar crónica post agudización que haya requerido VMNI en aquellos pacientes con enfermedad pulmonar restrictiva, neuromusculares y EPOC en los que persiste una PCO <sub>2</sub> > 56 mm Hg al alta                     |  | 80%                  |
| En la aplicación de TAFCN, utilizar flujos entre 40-50 lpm en pacientes con IRA hipoxémica moderada con una FiO <sub>2</sub> mínima para mantener una SpO <sub>2</sub> alrededor de 93-94% con la humidificación y temperatura ya anotadas previamente. |  | 100%                 |



## Documento Español de Consenso sobre la utilización del Soporte Respiratorio No Invasivo en el paciente con Insuficiencia Respiratoria Aguda grave

*Tabla 26. Recomendaciones de consenso para procedimiento y seguimiento del SRNI en pacientes en edad pediátrica.*

| Procedimiento.                                                                                                                                                                                                                                                                                                                                         | Recomendación                                                                       | % opción mayoritaria |
|--------------------------------------------------------------------------------------------------------------------------------------------------------------------------------------------------------------------------------------------------------------------------------------------------------------------------------------------------------|-------------------------------------------------------------------------------------|----------------------|
| En el paciente pediátrico deben valorarse los criterios clínicos de mejora a la 1-2 horas de inicio de la técnica: disminución de FC, FR, que deben ser acorde a la edad del paciente, mejora del trabajo respiratorio (disnea) y disminución de la actividad de los músculos respiratorios accesorios.                                                |    | 97 %                 |
| En el paciente pediátrico se debe monitorizar la PaO <sub>2</sub> / FiO <sub>2</sub> o SaO <sub>2</sub> / FiO <sub>2</sub>                                                                                                                                                                                                                             |    | 97 %                 |
| La ventilación por presión en modo espontáneo/asistido es el modo de elección inicial en la insuficiencia respiratoria aguda global (hipoxemia + hipercapnia)                                                                                                                                                                                          |    | 74 %                 |
| El modo CPAP es el modo de elección inicial en la IRA tipo I, hipoxémica sin hipercapnia, con fuerza respiratoria conservada.                                                                                                                                                                                                                          |    | 74 %                 |
| Uso de humidificación activa en el paciente en edad pediátrica                                                                                                                                                                                                                                                                                         |   | 94 %                 |
| Durante el soporte respiratorio no invasivo es necesario mantener un buen posicionamiento del paciente y la colocación de una sonda nasogástrica                                                                                                                                                                                                       |  | 64 %                 |
| En la VMNI en fase aguda, en paciente en edad pediátrica, el nivel de PS debe ser de alrededor de 4-5 cmH <sub>2</sub> O sobre el nivel de presión espiratoria (PEEP o EPAP). Una vez conseguida la tolerancia del paciente, el nivel de PS puede incrementarse en intervalos de 2 cm H <sub>2</sub> O hasta lograr disminuir el trabajo respiratorio. |  | 94 %                 |
| La retirada de VMNI en el paciente en edad pediátrica depende de la patología motivo de la indicación: más rápido cuanto menos tiempo de evolución.                                                                                                                                                                                                    |  | 69 %                 |
| En los pacientes neuromusculares pediátricos puede requerirse mantenimiento soporte crónico no invasivo en domicilio.                                                                                                                                                                                                                                  |  | 97 %                 |

## Documento Español de Consenso sobre la utilización del Soporte Respiratorio No Invasivo en el paciente con Insuficiencia Respiratoria Aguda grave

*Tabla 27. Recomendaciones de consenso para procedimiento y seguimiento del SRNI en pacientes en edad neonatal.*

| Contexto clínico                                                                                                                                                                                                                                 | Recomendación                                                                        | %opción mayoritaria |
|--------------------------------------------------------------------------------------------------------------------------------------------------------------------------------------------------------------------------------------------------|--------------------------------------------------------------------------------------|---------------------|
| Uso de humidificación activa en el paciente neonatal                                                                                                                                                                                             |    | 100%                |
| La interfase de elección en neonatología son las cánulas binasales cortas o mascarilla nasal.                                                                                                                                                    |    | 100%                |
| Los ventiladores de elección para VMNI neonatal son los generadores de flujo variable frente a continuo                                                                                                                                          |   | 100%                |
| FiO2 de acuerdo a SatO2 para EG                                                                                                                                                                                                                  |  | 100%                |
| Mantener un buen posicionamiento del paciente y colocación de sonda orogástrica                                                                                                                                                                  |  | 100%                |
| Consideración como criterios de fracaso la necesidad de una FiO2 de 0,4-0,5 para alcanzar la saturación diana en función de su edad gestacional, la disnea progresiva y las pausas de apnea, además de la persistencia de acidosis respiratoria. |  | 100%                |
| Iniciar la retirada de VMNI cuando FiO2<0,4, no apneas y/o bradicardias y, no signos clínicos de dificultad respiratoria                                                                                                                         |  | 100%                |



## 20. Referencias

- [1] Demoule A, Chevret S, Carlucci A, Kouatchet A, Jaber S, Meziani F, et al. Changing use of noninvasive ventilation in critically ill patients: trends over 15 years in francophone countries. *Intensive Care Med* 2016;42:82–92. <https://doi.org/10.1007/s00134-015-4087-4>.
- [2] Sullivan CE, Issa FG, Berthon-Jones M, Eves L. Reversal of obstructive sleep apnoea by continuous positive airway pressure applied through the nares. *Lancet Lond Engl* 1981;1:862–5.
- [3] Delaubier A, Guillou C, Mordelet M, Rideau Y. [Early respiratory assistance by nasal route in Duchenne's muscular dystrophy]. *Agressol Rev Int Physio-Biol Pharmacol Appl Aux Eff Agression* 1987;28:737–8.
- [4] Brochard L, Mancebo J, Wysocki M, Lofaso F, Conti G, Rauss A, et al. Noninvasive ventilation for acute exacerbations of chronic obstructive pulmonary disease. *N Engl J Med* 1995;333:818–22.
- [5] Bersten AD, Holt AW, Vedig AE, Skowronski GA, Baggoley CJ. Treatment of severe cardiogenic pulmonary edema with continuous positive airway pressure delivered by face mask. *N Engl J Med* 1991;325:1825–30. <https://doi.org/10.1056/NEJM199112263252601>.
- [6] Bersten AD, Holt AW, Vedig AE, Skowronski GA, Baggoley CJ. Treatment of severe cardiogenic pulmonary edema with continuous positive airway pressure delivered by face mask. *N Engl J Med* 1991;325:1825–30. <https://doi.org/10.1056/NEJM199112263252601>.
- [7] Brochard L, Isabey D, Piquet J, Amaro P, Mancebo J, Messadi AA, et al. Reversal of acute exacerbations of chronic obstructive lung disease by inspiratory assistance with a face mask. *N Engl J Med* 1990;323:1523–30. <https://doi.org/10.1056/NEJM199011293232204>.
- [8] Meduri GU, Conoscenti CC, Menashe P, Nair S. Noninvasive face mask ventilation in patients with acute respiratory failure. *Chest* 1989;95:865–70. <https://doi.org/10.1378/chest.95.4.865>.
- [9] Gregoretti C, Pisani L, Cortegiani A, Ranieri VM. Noninvasive ventilation in critically ill patients. *Crit Care Clin* 2015;31:435–57. <https://doi.org/10.1016/j.ccc.2015.03.002>.
- [10] Nava S, Hill N. Non-invasive ventilation in acute respiratory failure. *Lancet Lond Engl* 2009;374:250–9. [https://doi.org/10.1016/S0140-6736\(09\)60496-7](https://doi.org/10.1016/S0140-6736(09)60496-7).
- [11] Vital FMR, Ladeira MT, Atallah AN. Non-invasive positive pressure ventilation (CPAP or bilevel NPPV) for cardiogenic pulmonary oedema. *Cochrane Database Syst Rev* 2013;CD005351. <https://doi.org/10.1002/14651858.CD005351.pub3>.
- [12] Pisani L, Corcione N, Nava S. Management of acute hypercapnic respiratory failure. *Curr Opin Crit Care* 2016;22:45–52. <https://doi.org/10.1097/MCC.0000000000000269>.
- [13] Bach JR, Saporito LR, Shah HR, Siqueira D. Decanulation of patients with severe respiratory muscle insufficiency: efficacy of mechanical insufflation-exsufflation. *J Rehabil Med* 2014;46:1037–41. <https://doi.org/10.2340/16501977-1874>.

- [14] Bach JR, Gonçalves MR, Hamdani I, Winck JC. Extubation of patients with neuromuscular weakness: a new management paradigm. *Chest* 2010;137:1033–9. <https://doi.org/10.1378/chest.09-2144>.
- [15] Bach JR, Alba AS, Shin D. Management alternatives for post-polio respiratory insufficiency. Assisted ventilation by nasal or oral-nasal interface. *Am J Phys Med Rehabil* 1989;68:264–71.
- [16] Ferrer M, Torres A. Noninvasive ventilation for acute respiratory failure. *Curr Opin Crit Care* 2015;21:1–6. <https://doi.org/10.1097/MCC.000000000000173>.
- [17] Hess DR. Patient-ventilator interaction during noninvasive ventilation. *Respir Care* 2011;56:153–65; discussion 165–167. <https://doi.org/10.4187/respcare.01049>.
- [18] Vignaux L, Vargas F, Roeseler J, Tassaux D, Thille AW, Kossowsky MP, et al. Patient-ventilator asynchrony during non-invasive ventilation for acute respiratory failure: a multicenter study. *Intensive Care Med* 2009;35:840–6. <https://doi.org/10.1007/s00134-009-1416-5>.
- [19] Medina-Villanueva A, Pons-Òdena M, Martínón-Torres F. Ventilación no invasiva en pediatría. 3ª. Ergon, Madrid; 2015.
- [20] Frat J-P, Thille AW, Mercat A, Girault C, Ragot S, Perbet S, et al. High-flow oxygen through nasal cannula in acute hypoxemic respiratory failure. *N Engl J Med* 2015;372:2185–96. <https://doi.org/10.1056/NEJMoa1503326>.
- [21] Nee PA, Al-Jubouri MA, Gray AJ, O'Donnell C, Strong D. Critical care in the emergency department: acute respiratory failure. *Emerg Med J EMJ* 2011;28:94–7. <https://doi.org/10.1136/emj.2005.030643>.
- [22] Pisani L, Nava S. Noninvasive ventilation in acute hypercapnic respiratory failure. *Semin Respir Crit Care Med* 2014;35:501–6. <https://doi.org/10.1055/s-0034-1383864>.
- [23] ARDS Definition Task Force, Ranieri VM, Rubenfeld GD, Thompson BT, Ferguson ND, Caldwell E, et al. Acute respiratory distress syndrome: the Berlin Definition. *JAMA* 2012;307:2526–33. <https://doi.org/10.1001/jama.2012.5669>.
- [24] Tomii K, Seo R, Tachikawa R, Harada Y, Murase K, Kaji R, et al. Impact of noninvasive ventilation (NIV) trial for various types of acute respiratory failure in the emergency department; decreased mortality and use of the ICU. *Respir Med* 2009;103:67–73. <https://doi.org/10.1016/j.rmed.2008.08.001>.
- [25] Lip GYH, Collet JP, Caterina R de, Fauchier L, Lane DA, Larsen TB, et al. Antithrombotic therapy in atrial fibrillation associated with valvular heart disease: a joint consensus document from the European Heart Rhythm Association (EHRA) and European Society of Cardiology Working Group on Thrombosis, endorsed by the ESC Working Group on Valvular Heart Disease, Cardiac Arrhythmia Society of Southern Africa (CASSA), Heart Rhythm Society (HRS), Asia Pacific Heart Rhythm Society (APHRS), South African Heart (SA Heart) Association and Sociedad Latinoamericana de Estimulación Cardíaca y Electrofisiología (SOLEACE). *Eur Eur Pacing Arrhythm Card Electrophysiol J Work Groups Card Pacing Arrhythm Card Cell Electrophysiol Eur Soc Cardiol* 2017;19:1757–8. <https://doi.org/10.1093/europace/eux240>.
- [26] Atkins D, Eccles M, Flottorp S, Guyatt GH, Henry D, Hill S, et al. Systems for grading the quality of evidence and the strength of recommendations I: critical

- appraisal of existing approaches The GRADE Working Group. *BMC Health Serv Res* 2004;4:38. <https://doi.org/10.1186/1472-6963-4-38>.
- [27] Cinesi-Gómez C, García-García P, López-Pelayo I, Giménez JI, González-Torres LM, Bernal-Morell E. Correlation between oxyhaemoglobin saturation by pulse oximetry and partial pressure of oxygen in patients with acute respiratory failure. *Rev Clin Esp* 2017;217:522–5. <https://doi.org/10.1016/j.rce.2017.08.006>.
- [28] Mort TC. Complications of emergency tracheal intubation: immediate airway-related consequences: part II. *J Intensive Care Med* 2007;22:208–15. <https://doi.org/10.1177/0885066607301359>.
- [29] Martin LD, Mhyre JM, Shanks AM, Tremper KK, Kheterpal S. 3,423 emergency tracheal intubations at a university hospital: airway outcomes and complications. *Anesthesiology* 2011;114:42–8. <https://doi.org/10.1097/ALN.0b013e318201c415>.
- [30] Rialp Cervera G, del Castillo Blanco A, Pérez Aizcorreta O, Parra Morais L, GT-IRA of SEMICYUC. Noninvasive mechanical ventilation in chronic obstructive pulmonary disease and in acute cardiogenic pulmonary edema. *Med Intensiva* 2014;38:111–21. <https://doi.org/10.1016/j.medin.2012.09.007>.
- [31] Brochard L, Mancebo J, Wysocki M, Lofaso F, Conti G, Rauss A, et al. Noninvasive ventilation for acute exacerbations of chronic obstructive pulmonary disease. *N Engl J Med* 1995;333:817–22. <https://doi.org/10.1056/NEJM199509283331301>.
- [32] Bott J, Carroll MP, Conway JH, Keilty SE, Ward EM, Brown AM, et al. Randomised controlled trial of nasal ventilation in acute ventilatory failure due to chronic obstructive airways disease. *Lancet Lond Engl* 1993;341:1555–7. [https://doi.org/10.1016/0140-6736\(93\)90696-e](https://doi.org/10.1016/0140-6736(93)90696-e).
- [33] Celikel T, Sungur M, Ceyhan B, Karakurt S. Comparison of noninvasive positive pressure ventilation with standard medical therapy in hypercapnic acute respiratory failure. *Chest* 1998;114:1636–42.
- [34] Kramer N, Meyer TJ, Meharg J, Cece RD, Hill NS. Randomized, prospective trial of noninvasive positive pressure ventilation in acute respiratory failure. *Am J Respir Crit Care Med* 1995;151:1799–806. <https://doi.org/10.1164/ajrccm.151.6.7767523>.
- [35] Lightowler JV, Wedzicha JA, Elliott MW, Ram FSF. Non-invasive positive pressure ventilation to treat respiratory failure resulting from exacerbations of chronic obstructive pulmonary disease: Cochrane systematic review and meta-analysis. *BMJ* 2003;326:185.
- [36] Olivieri C, Carenzo L, Vignazia GL, Campanini M, Pirisi M, Della Corte F, et al. Does noninvasive ventilation delivery in the ward provide early effective ventilation? *Respir Care* 2015;60:6–11. <https://doi.org/10.4187/respcare.03294>.
- [37] Kollef MH. Non-invasive ventilation for chronic obstructive pulmonary disease. *Lancet Lond Engl* 2000;356:956–7. [https://doi.org/10.1016/S0140-6736\(00\)02708-2](https://doi.org/10.1016/S0140-6736(00)02708-2).
- [38] González Barcala FJ, Zamarrón Sanz C, Salgueiro Rodríguez M, Rodríguez Suárez JR. [Non-invasive ventilation in chronic obstructive pulmonary disease patients with acute respiratory hypercapnic failure in a conventional hospital ward]. *An Med Interna Madr Spain* 1984 2004;21:373–7.

- [39] Barbé F, Togores B, Rubí M, Pons S, Maimó A, Agustí AG. Noninvasive ventilatory support does not facilitate recovery from acute respiratory failure in chronic obstructive pulmonary disease. *Eur Respir J* 1996;9:1240–5.
- [40] Keenan SP, Powers CE, McCormack DG. Noninvasive positive-pressure ventilation in patients with milder chronic obstructive pulmonary disease exacerbations: a randomized controlled trial. *Respir Care* 2005;50:610–6.
- [41] Rochwerg B, Brochard L, Elliott MW, Hess D, Hill NS, Nava S, et al. Official ERS/ATS clinical practice guidelines: noninvasive ventilation for acute respiratory failure. *Eur Respir J* 2017;50. <https://doi.org/10.1183/13993003.02426-2016>.
- [42] Conti G, Antonelli M, Navalesi P, Rocco M, Bufi M, Spadetta G, et al. Noninvasive vs. conventional mechanical ventilation in patients with chronic obstructive pulmonary disease after failure of medical treatment in the ward: a randomized trial. *Intensive Care Med* 2002;28:1701–7. <https://doi.org/10.1007/s00134-002-1478-0>.
- [43] Antonelli M, Conti G, Rocco M, Bufi M, De Blasi RA, Vivino G, et al. A comparison of noninvasive positive-pressure ventilation and conventional mechanical ventilation in patients with acute respiratory failure. *N Engl J Med* 1998;339:429–35. <https://doi.org/10.1056/NEJM199808133390703>.
- [44] Weng C-L, Zhao Y-T, Liu Q-H, Fu C-J, Sun F, Ma Y-L, et al. Meta-analysis: Noninvasive ventilation in acute cardiogenic pulmonary edema. *Ann Intern Med* 2010;152:590–600. <https://doi.org/10.7326/0003-4819-152-9-201005040-00009>.
- [45] Peter JV, Moran JL, Phillips-Hughes J, Graham P, Bersten AD. Effect of non-invasive positive pressure ventilation (NIPPV) on mortality in patients with acute cardiogenic pulmonary oedema: a meta-analysis. *Lancet Lond Engl* 2006;367:1155–63. [https://doi.org/10.1016/S0140-6736\(06\)68506-1](https://doi.org/10.1016/S0140-6736(06)68506-1).
- [46] Räsänen J, Heikkilä J, Downs J, Nikki P, Väisänen I, Viitanen A. Continuous positive airway pressure by face mask in acute cardiogenic pulmonary edema. *Am J Cardiol* 1985;55:296–300. [https://doi.org/10.1016/0002-9149\(85\)90364-9](https://doi.org/10.1016/0002-9149(85)90364-9).
- [47] Masip J, Roque M, Sánchez B, Fernández R, Subirana M, Expósito JA. Noninvasive ventilation in acute cardiogenic pulmonary edema: systematic review and meta-analysis. *JAMA* 2005;294:3124–30. <https://doi.org/10.1001/jama.294.24.3124>.
- [48] Winck JC, Azevedo LF, Costa-Pereira A, Antonelli M, Wyatt JC. Efficacy and safety of non-invasive ventilation in the treatment of acute cardiogenic pulmonary edema--a systematic review and meta-analysis. *Crit Care Lond Engl* 2006;10:R69. <https://doi.org/10.1186/cc4905>.
- [49] Gray A, Goodacre S, Newby DE, Masson M, Sampson F, Nicholl J, et al. Noninvasive ventilation in acute cardiogenic pulmonary edema. *N Engl J Med* 2008;359:142–51. <https://doi.org/10.1056/NEJMoa0707992>.
- [50] Liesching T, Nelson DL, Cormier KL, Sucov A, Short K, Warburton R, et al. Randomized trial of bilevel versus continuous positive airway pressure for acute pulmonary edema. *J Emerg Med* 2014;46:130–40. <https://doi.org/10.1016/j.jemermed.2013.08.015>.
- [51] Nouria S, Boukef R, Bouida W, Kerkeni W, Beltaief K, Boubaker H, et al. Non-invasive pressure support ventilation and CPAP in cardiogenic pulmonary edema: a multicenter randomized study in the emergency department.



- Intensive Care Med 2011;37:249–56. <https://doi.org/10.1007/s00134-010-2082-3>.
- [52] Masip J, Peacock WF, Price S, Cullen L, Martin-Sanchez FJ, Seferovic P, et al. Indications and practical approach to non-invasive ventilation in acute heart failure. *Eur Heart J* 2018;39:17–25. <https://doi.org/10.1093/eurheartj/ehx580>.
- [53] Carrillo A, Ferrer M, Gonzalez-Diaz G, Lopez-Martinez A, Llamas N, Alcazar M, et al. Noninvasive Ventilation in Acute Hypercapnic Respiratory Failure Caused by Obesity Hypoventilation Syndrome and Chronic Obstructive Pulmonary Disease. *Am J Respir Crit Care Med* 2012;186:1279–85. <https://doi.org/10.1164/rccm.201206-1101OC>.
- [54] Curtis JR, Cook DJ, Sinuff T, White DB, Hill N, Keenan SP, et al. Noninvasive positive pressure ventilation in critical and palliative care settings: understanding the goals of therapy. *Crit Care Med* 2007;35:932–9. <https://doi.org/10.1097/01.CCM.0000256725.73993.74>.
- [55] Nava S, Ferrer M, Esquinas A, Scala R, Groff P, Cosentini R, et al. Palliative use of non-invasive ventilation in end-of-life patients with solid tumours: a randomised feasibility trial. *Lancet Oncol* 2013;14:219–27. [https://doi.org/10.1016/S1470-2045\(13\)70009-3](https://doi.org/10.1016/S1470-2045(13)70009-3).
- [56] Quill CM, Quill TE. Palliative use of noninvasive ventilation: navigating murky waters. *J Palliat Med* 2014;17:657–61. <https://doi.org/10.1089/jpm.2014.0010>.
- [57] Yeow M-E, Mehta RS, White DB, Szmulowicz E. Using noninvasive ventilation at the end of life #230. *J Palliat Med* 2010;13:1149–50. <https://doi.org/10.1089/jpm.2010.9788>.
- [58] Lim WJ, Mohammed Akram R, Carson KV, Mysore S, Labiszewski NA, Wedzicha JA, et al. Non-invasive positive pressure ventilation for treatment of respiratory failure due to severe acute exacerbations of asthma. *Cochrane Database Syst Rev* 2012;12:CD004360. <https://doi.org/10.1002/14651858.CD004360.pub4>.
- [59] SRLF Trial Group. Hypoxemia in the ICU: prevalence, treatment, and outcome. *Ann Intensive Care* 2018;8:82. <https://doi.org/10.1186/s13613-018-0424-4>.
- [60] Bellani G, Laffey JG, Pham T, Madotto F, Fan E, Brochard L, et al. Noninvasive Ventilation of Patients with Acute Respiratory Distress Syndrome. Insights from the LUNG SAFE Study. *Am J Respir Crit Care Med* 2017;195:67–77. <https://doi.org/10.1164/rccm.201606-1306OC>.
- [61] Bellani G, Laffey JG, Pham T, Fan E, Brochard L, Esteban A, et al. Epidemiology, Patterns of Care, and Mortality for Patients With Acute Respiratory Distress Syndrome in Intensive Care Units in 50 Countries. *JAMA* 2016;315:788. <https://doi.org/10.1001/jama.2016.0291>.
- [62] Carrillo A, Gonzalez-Diaz G, Ferrer M, Martinez-Quintana ME, Lopez-Martinez A, Llamas N, et al. Non-invasive ventilation in community-acquired pneumonia and severe acute respiratory failure. *Intensive Care Med* 2012;38:458–66. <https://doi.org/10.1007/s00134-012-2475-6>.
- [63] Ferrer M, Cosentini R, Nava S. The use of non-invasive ventilation during acute respiratory failure due to pneumonia. *Eur J Intern Med* 2012;23:420–8. <https://doi.org/10.1016/j.ejim.2012.02.011>.
- [64] Stefan MS, Priya A, Pekow PS, Lagu T, Steingrub JS, Hill NS, et al. The comparative effectiveness of noninvasive and invasive ventilation in patients



- pneumonia. J Crit Care 2018;43:190–6.
- 
- <https://doi.org/10.1016/j.jcrc.2017.05.023>
- .
- 
- [65] Valley TS, Walkey AJ, Lindenauer PK, Wiener RS, Cooke CR. Association Between Noninvasive Ventilation and Mortality Among Older Patients With Pneumonia. Crit Care Med 2017;45:e246–54.
- 
- <https://doi.org/10.1097/CCM.0000000000002076>
- .
- 
- [66] Lemiale V, Mokart D, Resche-Rigon M, Pène F, Mayaux J, Faucher E, et al. Effect of Noninvasive Ventilation vs Oxygen Therapy on Mortality Among Immunocompromised Patients With Acute Respiratory Failure: A Randomized Clinical Trial. JAMA 2015;314:1711–9.
- 
- <https://doi.org/10.1001/jama.2015.12402>
- .
- 
- [67] Frat J-P, Ragot S, Girault C, Perbet S, Prat G, Boulain T, et al. Effect of non-invasive oxygenation strategies in immunocompromised patients with severe acute respiratory failure: a post-hoc analysis of a randomised trial. Lancet Respir Med 2016;4:646–52.
- [https://doi.org/10.1016/S2213-2600\(16\)30093-5](https://doi.org/10.1016/S2213-2600(16)30093-5)
- .
- 
- [68] Azoulay E, Lemiale V, Mokart D, Nseir S, Argaud L, Pène F, et al. Effect of High-Flow Nasal Oxygen vs Standard Oxygen on 28-Day Mortality in Immunocompromised Patients With Acute Respiratory Failure: The HIGH Randomized Clinical Trial. JAMA 2018;320:2099–107.
- 
- <https://doi.org/10.1001/jama.2018.14282>
- .
- 
- [69] Huang H-B, Peng J-M, Weng L, Liu G-Y, Du B. High-flow oxygen therapy in immunocompromised patients with acute respiratory failure: A review and meta-analysis. J Crit Care 2018;43:300–5.
- 
- <https://doi.org/10.1016/j.jcrc.2017.09.176>
- .
- 
- [70] Cortegiani A, Crimi C, Noto A, Helviz Y, Giarratano A, Gregoretti C, et al. Effect of high-flow nasal therapy on dyspnea, comfort, and respiratory rate. Crit Care Lond Engl 2019;23:201.
- <https://doi.org/10.1186/s13054-019-2473-y>
- .
- 
- [71] Ou X, Hua Y, Liu J, Gong C, Zhao W. Effect of high-flow nasal cannula oxygen therapy in adults with acute hypoxemic respiratory failure: a meta-analysis of randomized controlled trials. CMAJ Can Med Assoc J J Assoc Medicale Can 2017;189:E260–7.
- <https://doi.org/10.1503/cmaj.160570>
- .
- 
- [72] Zhan Q, Sun B, Liang L, Yan X, Zhang L, Yang J, et al. Early use of noninvasive positive pressure ventilation for acute lung injury: a multicenter randomized controlled trial. Crit Care Med 2012;40:455–60.
- 
- <https://doi.org/10.1097/CCM.0b013e318232d75e>
- .
- 
- [73] Patel BK, Wolfe KS, Pohlman AS, Hall JB, Kress JP. Effect of Noninvasive Ventilation Delivered by Helmet vs Face Mask on the Rate of Endotracheal Intubation in Patients With Acute Respiratory Distress Syndrome: A Randomized Clinical Trial. JAMA 2016;315:2435–41.
- 
- <https://doi.org/10.1001/jama.2016.6338>
- .
- 
- [74] Ferguson ND, Fan E, Camporota L, Antonelli M, Anzueto A, Beale R, et al. The Berlin definition of ARDS: an expanded rationale, justification, and supplementary material. Intensive Care Med 2012;38:1573–82.
- 
- <https://doi.org/10.1007/s00134-012-2682-1>
- .
- 
- [75] Wilson ME, Majzoub AM, Dobler CC, Curtis JR, Nayfeh T, Thorsteinsdottir B, et al. Noninvasive Ventilation in Patients With Do-Not-Intubate and Comfort-

- Measures-Only Orders: A Systematic Review and Meta-Analysis. *Crit Care Med* 2018;46:1209–16. <https://doi.org/10.1097/CCM.0000000000003082>.
- [76] Masa JF, Utrabo I, Gomez de Terreros J, Aburto M, Esteban C, Prats E, et al. Noninvasive ventilation for severely acidotic patients in respiratory intermediate care units: Precision medicine in intermediate care units. *BMC Pulm Med* 2016;16:97. <https://doi.org/10.1186/s12890-016-0262-9>.
- [77] Cabrera Serrano M, Rabinstein AA. Causes and outcomes of acute neuromuscular respiratory failure. *Arch Neurol* 2010;67:1089–94. <https://doi.org/10.1001/archneurol.2010.207>.
- [78] Luo F, Annane D, Orlikowski D, He L, Yang M, Zhou M, et al. Invasive versus non-invasive ventilation for acute respiratory failure in neuromuscular disease and chest wall disorders. *Cochrane Database Syst Rev* 2017;12:CD008380. <https://doi.org/10.1002/14651858.CD008380.pub2>.
- [79] Chiumello D, Coppola S, Froio S, Gregoretti C, Consonni D. Noninvasive ventilation in chest trauma: systematic review and meta-analysis. *Intensive Care Med* 2013;39:1171–80. <https://doi.org/10.1007/s00134-013-2901-4>.
- [80] British Thoracic Society Standards of Care Committee. Non-invasive ventilation in acute respiratory failure. *Thorax* 2002;57:192–211. <https://doi.org/10.1136/thorax.57.3.192>.
- [81] Keenan SP, Sinuff T, Burns KEA, Muscedere J, Kutsogiannis J, Mehta S, et al. Clinical practice guidelines for the use of noninvasive positive-pressure ventilation and noninvasive continuous positive airway pressure in the acute care setting. *CMAJ Can Med Assoc J* 2011;183:E195–214. <https://doi.org/10.1503/cmaj.100071>.
- [82] Hernandez G, Fernandez R, Lopez-Reina P, Cuenca R, Pedrosa A, Ortiz R, et al. Noninvasive ventilation reduces intubation in chest trauma-related hypoxemia: a randomized clinical trial. *Chest* 2010;137:74–80. <https://doi.org/10.1378/chest.09-1114>.
- [83] Burns KEA, Meade MO, Premji A, Adhikari NKJ. Noninvasive ventilation as a weaning strategy for mechanical ventilation in adults with respiratory failure: a Cochrane systematic review. *CMAJ Can Med Assoc J J Assoc Medicale Can* 2014;186:E112–122. <https://doi.org/10.1503/cmaj.130974>.
- [84] Vaschetto R, Longhini F, Persona P, Ori C, Stefani G, Liu S, et al. Early extubation followed by immediate noninvasive ventilation vs. standard extubation in hypoxemic patients: a randomized clinical trial. *Intensive Care Med* 2019;45:62–71. <https://doi.org/10.1007/s00134-018-5478-0>.
- [85] Perkins GD, Mistry D, Gates S, Gao F, Snelson C, Hart N, et al. Effect of Protocolized Weaning With Early Extubation to Noninvasive Ventilation vs Invasive Weaning on Time to Liberation From Mechanical Ventilation Among Patients With Respiratory Failure: The Breathe Randomized Clinical Trial. *JAMA* 2018;320:1881–8. <https://doi.org/10.1001/jama.2018.13763>.
- [86] Nava S, Gregoretti C, Fanfulla F, Squadrone E, Grassi M, Carlucci A, et al. Noninvasive ventilation to prevent respiratory failure after extubation in high-risk patients. *Crit Care Med* 2005;33:2465–70. <https://doi.org/10.1097/01.ccm.0000186416.44752.72>.
- [87] Ferrer M, Sellarés J, Valencia M, Carrillo A, Gonzalez G, Badia JR, et al. Non-invasive ventilation after extubation in hypercapnic patients with chronic

- respiratory disorders: randomised controlled trial. *Lancet Lond Engl* 2009;374:1082–8. [https://doi.org/10.1016/S0140-6736\(09\)61038-2](https://doi.org/10.1016/S0140-6736(09)61038-2).
- [88] Ferrer M, Valencia M, Nicolas JM, Bernadich O, Badia JR, Torres A. Early noninvasive ventilation averts extubation failure in patients at risk: a randomized trial. *Am J Respir Crit Care Med* 2006;173:164–70. <https://doi.org/10.1164/rccm.200505-718OC>.
- [89] Thille AW, Muller G, Gacouin A, Coudroy R, Decavèle M, Sonnevile R, et al. Effect of Postextubation High-Flow Nasal Oxygen With Noninvasive Ventilation vs High-Flow Nasal Oxygen Alone on Reintubation Among Patients at High Risk of Extubation Failure: A Randomized Clinical Trial. *JAMA* 2019. <https://doi.org/10.1001/jama.2019.14901>.
- [90] Esteban A, Frutos-Vivar F, Ferguson ND, Arabi Y, Apezteguía C, González M, et al. Noninvasive positive-pressure ventilation for respiratory failure after extubation. *N Engl J Med* 2004;350:2452–60. <https://doi.org/10.1056/NEJMoa032736>.
- [91] Keenan SP, Powers C, McCormack DG, Block G. Noninvasive positive-pressure ventilation for postextubation respiratory distress: a randomized controlled trial. *JAMA* 2002;287:3238–44. <https://doi.org/10.1001/jama.287.24.3238>.
- [92] Squadrone V, Coxa M, Cerutti E, Schellino MM, Biolino P, Occella P, et al. Continuous positive airway pressure for treatment of postoperative hypoxemia: a randomized controlled trial. *JAMA* 2005;293:589–95. <https://doi.org/10.1001/jama.293.5.589>.
- [93] Auriant I, Jallot A, Hervé P, Cerrina J, Le Roy Ladurie F, Fournier JL, et al. Noninvasive ventilation reduces mortality in acute respiratory failure following lung resection. *Am J Respir Crit Care Med* 2001;164:1231–5. <https://doi.org/10.1164/ajrccm.164.7.2101089>.
- [94] Jaber S, Lescot T, Futier E, Paugam-Burtz C, Seguin P, Ferrandiere M, et al. Effect of Noninvasive Ventilation on Tracheal Reintubation Among Patients With Hypoxemic Respiratory Failure Following Abdominal Surgery: A Randomized Clinical Trial. *JAMA* 2016;315:1345–53. <https://doi.org/10.1001/jama.2016.2706>.
- [95] Faria DAS, da Silva EMK, Atallah ÁN, Vital FMR. Noninvasive positive pressure ventilation for acute respiratory failure following upper abdominal surgery. *Cochrane Database Syst Rev* 2015;CD009134. <https://doi.org/10.1002/14651858.CD009134.pub2>.
- [96] Ouellette DR, Patel S, Girard TD, Morris PE, Schmidt GA, Truitt JD, et al. Liberation From Mechanical Ventilation in Critically Ill Adults: An Official American College of Chest Physicians/American Thoracic Society Clinical Practice Guideline: Inspiratory Pressure Augmentation During Spontaneous Breathing Trials, Protocols Minimizing Sedation, and Noninvasive Ventilation Immediately After Extubation. *Chest* 2017;151:166–80. <https://doi.org/10.1016/j.chest.2016.10.036>.
- [97] Cheung TMT, Yam LYC, So LKY, Lau ACW, Poon E, Kong BMH, et al. Effectiveness of noninvasive positive pressure ventilation in the treatment of acute respiratory failure in severe acute respiratory syndrome. *Chest* 2004;126:845–50. <https://doi.org/10.1378/chest.126.3.845>.
- [98] Belenguer-Muncharaz A, Reig-Valero R, Altaba-Tena S, Casero-Roig P, Ferrándiz-Sellés A. [Noninvasive mechanical ventilation in severe pneumonia due to H1N1

- virus]. *Med Intensiva* 2011;35:470–7. <https://doi.org/10.1016/j.medin.2011.04.001>.
- [99] Estenssoro E, Ríos FG, Apezteguía C, Reina R, Neira J, Ceraso DH, et al. Pandemic 2009 influenza A in Argentina: a study of 337 patients on mechanical ventilation. *Am J Respir Crit Care Med* 2010;182:41–8. <https://doi.org/10.1164/201001-0037OC>.
- [100] Masclans JR, Pérez M, Almirall J, Lorente L, Marqués A, Socías L, et al. Early non-invasive ventilation treatment for severe influenza pneumonia. *Clin Microbiol Infect Off Publ Eur Soc Clin Microbiol Infect Dis* 2013;19:249–56. <https://doi.org/10.1111/j.1469-0691.2012.03797.x>.
- [101] Cinesi Gómez C, Peñuelas Rodríguez Ó, Luján Torné M, Egea Santaolalla C, Masa Jiménez JF, García Fernández J, et al. Clinical Consensus Recommendations Regarding Non-Invasive Respiratory Support in the Adult Patient with Acute Respiratory Failure Secondary to SARS-CoV-2 infection. *Arch Bronconeumol* 2020. <https://doi.org/10.1016/j.arbres.2020.03.005>.
- [102] Mason M, Cates CJ, Smith I. Effects of opioid, hypnotic and sedating medications on sleep-disordered breathing in adults with obstructive sleep apnoea. *Cochrane Database Syst Rev* 2015:CD011090. <https://doi.org/10.1002/14651858.CD011090.pub2>.
- [103] Stéphan F, Barrucand B, Petit P, Rézaiguia-Delclaux S, Médard A, Delannoy B, et al. High-Flow Nasal Oxygen vs Noninvasive Positive Airway Pressure in Hypoxemic Patients After Cardiothoracic Surgery: A Randomized Clinical Trial. *JAMA* 2015;313:2331–9. <https://doi.org/10.1001/jama.2015.5213>.
- [104] Tong S, Gower J, Morgan A, Gadbois K, Wisbach G. Noninvasive positive pressure ventilation in the immediate post-bariatric surgery care of patients with obstructive sleep apnea: a systematic review. *Surg Obes Relat Dis Off J Am Soc Bariat Surg* 2017;13:1227–33. <https://doi.org/10.1016/j.soard.2017.02.009>.
- [105] Moreno Balsalobre R, Planas Roca A, Ramasco Rueda F. Manual anestesia y medicina perioperatoria en cirugía torácica. 2ª. Ergon, Madrid; 2017.
- [106] Chen T-H, Hsu J-H, Wu J-R, Dai Z-K, Chen I-C, Liang W-C, et al. Combined noninvasive ventilation and mechanical in-exsufflator in the treatment of pediatric acute neuromuscular respiratory failure. *Pediatr Pulmonol* 2014;49:589–96. <https://doi.org/10.1002/ppul.22827>.
- [107] Finkel RS, Mercuri E, Meyer OH, Simonds AK, Schroth MK, Graham RJ, et al. Diagnosis and management of spinal muscular atrophy: Part 2: Pulmonary and acute care; medications, supplements and immunizations; other organ systems; and ethics. *Neuromuscul Disord NMD* 2018;28:197–207. <https://doi.org/10.1016/j.nmd.2017.11.004>.
- [108] Vianello A, Arcaro G, Braccioni F, Gallan F, Marchi MR, Chizio S, et al. Prevention of extubation failure in high-risk patients with neuromuscular disease. *J Crit Care* 2011;26:517–24. <https://doi.org/10.1016/j.jcrc.2010.12.008>.
- [109] Yaman A, Kendirli T, Ödek Ç, Ateş C, Taşyapar N, Güneş M, et al. Efficacy of noninvasive mechanical ventilation in prevention of intubation and reintubation in the pediatric intensive care unit. *J Crit Care* 2016;32:175–81. <https://doi.org/10.1016/j.jcrc.2015.12.013>.

- [110] Mayordomo-Colunga J, Medina A, Rey C, Concha A, Menéndez S, Los Arcos M, et al. Non invasive ventilation after extubation in paediatric patients: a preliminary study. *BMC Pediatr* 2010;10:29. <https://doi.org/10.1186/1471-2431-10-29>.
- [111] Mayordomo-Colunga J, Pons M, López Y, José Solana M, Rey C, Martínez-Cambor P, et al. Predicting non-invasive ventilation failure in children from the SpO<sub>2</sub>/FiO<sub>2</sub> (SF) ratio. *Intensive Care Med* 2013;39:1095–103. <https://doi.org/10.1007/s00134-013-2880-5>.
- [112] Piastra M, De Luca D, Marzano L, Stival E, Genovese O, Pietrini D, et al. The number of failing organs predicts non-invasive ventilation failure in children with ALI/ARDS. *Intensive Care Med* 2011;37:1510–6. <https://doi.org/10.1007/s00134-011-2308-z>.
- [113] Piastra M, Antonelli M, Chiaretti A, Polidori G, Polidori L, Conti G. Treatment of acute respiratory failure by helmet-delivered non-invasive pressure support ventilation in children with acute leukemia: a pilot study. *Intensive Care Med* 2004;30:472–6. <https://doi.org/10.1007/s00134-003-2103-6>.
- [114] Chisti MJ, Salam MA, Smith JH, Ahmed T, Pietroni MAC, Shahunja KM, et al. Bubble continuous positive airway pressure for children with severe pneumonia and hypoxaemia in Bangladesh: an open, randomised controlled trial. *Lancet Lond Engl* 2015;386:1057–65. [https://doi.org/10.1016/S0140-6736\(15\)60249-5](https://doi.org/10.1016/S0140-6736(15)60249-5).
- [115] Walk J, Dinga P, Banda C, Msiska T, Chitsamba E, Chiwayula N, et al. Non-invasive ventilation with bubble CPAP is feasible and improves respiratory physiology in hospitalised Malawian children with acute respiratory failure. *Paediatr Int Child Health* 2016;36:28–33. <https://doi.org/10.1179/2046905514Y.0000000166>.
- [116] Donlan M, Fontela PS, Puligandla PS. Use of continuous positive airway pressure (CPAP) in acute viral bronchiolitis: a systematic review. *Pediatr Pulmonol* 2011;46:736–46. <https://doi.org/10.1002/ppul.21483>.
- [117] Combret Y, Prieur G, LE Roux P, Médrinal C. Non-invasive ventilation improves respiratory distress in children with acute viral bronchiolitis: a systematic review. *Minerva Anesthesiol* 2017;83:624–37. <https://doi.org/10.23736/S0375-9393.17.11708-6>.
- [118] Milési C, Boubal M, Jacquot A, Baleine J, Durand S, Odena MP, et al. High-flow nasal cannula: recommendations for daily practice in pediatrics. *Ann Intensive Care* 2014;4:29. <https://doi.org/10.1186/s13613-014-0029-5>.
- [119] Basnet S, Mander G, Andoh J, Klaska H, Verhulst S, Koirala J. Safety, efficacy, and tolerability of early initiation of noninvasive positive pressure ventilation in pediatric patients admitted with status asthmaticus: a pilot study. *Pediatr Crit Care Med J Soc Crit Care Med World Fed Pediatr Intensive Crit Care Soc* 2012;13:393–8. <https://doi.org/10.1097/PCC.0b013e318238b07a>.
- [120] Carroll CL, Schramm CM. Noninvasive positive pressure ventilation for the treatment of status asthmaticus in children. *Ann Allergy Asthma Immunol Off Publ Am Coll Allergy Asthma Immunol* 2006;96:454–9. [https://doi.org/10.1016/S1081-1206\(10\)60913-1](https://doi.org/10.1016/S1081-1206(10)60913-1).
- [121] Mayordomo-Colunga J, Medina A, Rey C, Concha A, Menéndez S, Arcos ML, et al. Non-invasive ventilation in pediatric status asthmaticus: a prospective observational study. *Pediatr Pulmonol* 2011;46:949–55. <https://doi.org/10.1002/ppul.21466>.



- [122] Pilar J, Modesto I Alapont V, Lopez-Fernandez YM, Lopez-Macias O, Garcia-Urabayen D, Amores-Hernandez I. High-flow nasal cannula therapy versus non-invasive ventilation in children with severe acute asthma exacerbation: An observational cohort study. *Med Intensiva* 2017;41:418–24. <https://doi.org/10.1016/j.medin.2017.01.001>.
- [123] Heilbronner C, Merckx A, Brousse V, Allali S, Hubert P, de Montalembert M, et al. Early Noninvasive Ventilation and Nonroutine Transfusion for Acute Chest Syndrome in Sick Cell Disease in Children: A Descriptive Study. *Pediatr Crit Care Med J Soc Crit Care Med World Fed Pediatr Intensive Crit Care Soc* 2018;19:e235–41. <https://doi.org/10.1097/PCC.0000000000001468>.
- [124] Pons Odena M, Piqueras Marimbaldo I, Segura Matute S, Balaguer Argallo M, Palomeque Rico A. [Non-invasive ventilation after cardiac surgery. A prospective study]. *An Pediatr Barc Spain* 2003 2009;71:13–9. <https://doi.org/10.1016/j.anpedi.2009.03.014>.
- [125] Prado F, Godoy MA, Godoy M, Boza ML. [Pediatric non-invasive ventilation for acute respiratory failure in an Intermediate Care Unit]. *Rev Med Chil* 2005;133:525–33. <https://doi.org/S0034-98872005000500003>.
- [126] Essouri S, Nicot F, Clément A, Garabedian E-N, Roger G, Lofaso F, et al. Noninvasive positive pressure ventilation in infants with upper airway obstruction: comparison of continuous and bilevel positive pressure. *Intensive Care Med* 2005;31:574–80. <https://doi.org/10.1007/s00134-005-2568-6>.
- [127] Padman R, Lawless ST, Kettrick RG. Noninvasive ventilation via bilevel positive airway pressure support in pediatric practice. *Crit Care Med* 1998;26:169–73. <https://doi.org/10.1097/00003246-199801000-00034>.
- [128] Collins JJ, Fitzgerald DA. Palliative care and paediatric respiratory medicine. *Paediatr Respir Rev* 2006;7:281–7. <https://doi.org/10.1016/j.prrv.2006.04.001>.
- [129] Hillman N, Jobe AH. Noninvasive strategies for management of respiratory problems in neonates. *NeoReviews* 2013;14:e227–e236.
- [130] Sweet DG, Carnielli V, Greisen G, Hallman M, Ozek E, Te Pas A, et al. European Consensus Guidelines on the Management of Respiratory Distress Syndrome - 2019 Update. *Neonatology* 2019;115:432–50. <https://doi.org/10.1159/000499361>.
- [131] Ferguson KN, Roberts CT, Manley BJ, Davis PG. Interventions to Improve Rates of Successful Extubation in Preterm Infants: A Systematic Review and Meta-analysis. *JAMA Pediatr* 2017;171:165–74. <https://doi.org/10.1001/jamapediatrics.2016.3015>.
- [132] Sweet DG, Carnielli V, Greisen G, Hallman M, Ozek E, Plavka R, et al. European Consensus Guidelines on the Management of Respiratory Distress Syndrome - 2016 Update. *Neonatology* 2017;111:107–25. <https://doi.org/10.1159/000448985>.
- [133] Jones PG, Kamona S, Doran O, Sawtell F, Wilsher M. Randomized Controlled Trial of Humidified High-Flow Nasal Oxygen for Acute Respiratory Distress in the Emergency Department: The HOT-ER Study. *Respir Care* 2016;61:291–9. <https://doi.org/10.4187/respcare.04252>.
- [134] Leeies M, Flynn E, Turgeon AF, Paunovic B, Loewen H, Rabbani R, et al. High-flow oxygen via nasal cannulae in patients with acute hypoxemic respiratory failure: a

- systematic review and meta-analysis. *Syst Rev* 2017;6:202. <https://doi.org/10.1186/s13643-017-0593-5>.
- [135] Lemiale V, Mokart D, Mayaux J, Lambert J, Rabbat A, Demoule A, et al. The effects of a 2-h trial of high-flow oxygen by nasal cannula versus Venturi mask in immunocompromised patients with hypoxemic acute respiratory failure: a multicenter randomized trial. *Crit Care Lond Engl* 2015;19:380. <https://doi.org/10.1186/s13054-015-1097-0>.
- [136] Maggiore SM, Idone FA, Vaschetto R, Festa R, Cataldo A, Antonicelli F, et al. Nasal high-flow versus Venturi mask oxygen therapy after extubation. Effects on oxygenation, comfort, and clinical outcome. *Am J Respir Crit Care Med* 2014;190:282–8. <https://doi.org/10.1164/rccm.201402-0364OC>.
- [137] Fernandez R, Subira C, Frutos-Vivar F, Rialp G, Laborda C, Masclans JR, et al. High-flow nasal cannula to prevent postextubation respiratory failure in high-risk non-hypercapnic patients: a randomized multicenter trial. *Ann Intensive Care* 2017;7:47. <https://doi.org/10.1186/s13613-017-0270-9>.
- [138] Hernández G, Vaquero C, González P, Subira C, Frutos-Vivar F, Rialp G, et al. Effect of Postextubation High-Flow Nasal Cannula vs Conventional Oxygen Therapy on Reintubation in Low-Risk Patients: A Randomized Clinical Trial. *JAMA* 2016;315:1354–61. <https://doi.org/10.1001/jama.2016.2711>.
- [139] Hernández G, Vaquero C, Colinas L, Cuenca R, González P, Canabal A, et al. Effect of Postextubation High-Flow Nasal Cannula vs Noninvasive Ventilation on Reintubation and Postextubation Respiratory Failure in High-Risk Patients: A Randomized Clinical Trial. *JAMA* 2016;316:1565–74. <https://doi.org/10.1001/jama.2016.14194>.
- [140] Futier E, Paugam-Burtz C, Godet T, Khoy-Ear L, Rozencwajg S, Delay J-M, et al. Effect of early postextubation high-flow nasal cannula vs conventional oxygen therapy on hypoxaemia in patients after major abdominal surgery: a French multicentre randomised controlled trial (OPERA). *Intensive Care Med* 2016;42:1888–98. <https://doi.org/10.1007/s00134-016-4594-y>.
- [141] Parke R, McGuinness S, Dixon R, Jull A. Open-label, phase II study of routine high-flow nasal oxygen therapy in cardiac surgical patients. *Br J Anaesth* 2013;111:925–31. <https://doi.org/10.1093/bja/aet262>.
- [142] Jaber S, Monnin M, Girard M, Conseil M, Cisse M, Carr J, et al. Apnoeic oxygenation via high-flow nasal cannula oxygen combined with non-invasive ventilation preoxygenation for intubation in hypoxaemic patients in the intensive care unit: the single-centre, blinded, randomised controlled OPTINIV trial. *Intensive Care Med* 2016;42:1877–87. <https://doi.org/10.1007/s00134-016-4588-9>.
- [143] Russotto V, Cortegiani A, Raineri SM, Gregoretti C, Giaratano A. Respiratory support techniques to avoid desaturation in critically ill patients requiring endotracheal intubation: A systematic review and meta-analysis. *J Crit Care* 2017;41:98–106. <https://doi.org/10.1016/j.jcrc.2017.05.003>.
- [144] Baillard C, Fosse J-P, Sebbane M, Chanques G, Vincent F, Courouble P, et al. Noninvasive ventilation improves preoxygenation before intubation of hypoxic patients. *Am J Respir Crit Care Med* 2006;174:171–7. <https://doi.org/10.1164/rccm.200509-1507OC>.



- [145] Vourc'h M, Asfar P, Volteau C, Bachoumas K, Clavieras N, Egreteau P-Y, et al. High-flow nasal cannula oxygen during endotracheal intubation in hypoxemic patients: a randomized controlled clinical trial. *Intensive Care Med* 2015;41:1538–48. <https://doi.org/10.1007/s00134-015-3796-z>.
- [146] Semler MW, Janz DR, Lentz RJ, Matthews DT, Norman BC, Assad TR, et al. Randomized Trial of Apneic Oxygenation during Endotracheal Intubation of the Critically Ill. *Am J Respir Crit Care Med* 2016;193:273–80. <https://doi.org/10.1164/rccm.201507-1294OC>.
- [147] Simon M, Wachs C, Braune S, de Heer G, Frings D, Kluge S. High-Flow Nasal Cannula Versus Bag-Valve-Mask for Preoxygenation Before Intubation in Subjects With Hypoxemic Respiratory Failure. *Respir Care* 2016;61:1160–7. <https://doi.org/10.4187/respcare.04413>.
- [148] Oliveira J E Silva L, Cabrera D, Barrionuevo P, Johnson RL, Erwin PJ, Murad MH, et al. Effectiveness of Apneic Oxygenation During Intubation: A Systematic Review and Meta-Analysis. *Ann Emerg Med* 2017;70:483-494.e11. <https://doi.org/10.1016/j.annemergmed.2017.05.001>.
- [149] Douglas N, Ng I, Nazeem F, Lee K, Mezzavia P, Krieser R, et al. A randomised controlled trial comparing high-flow nasal oxygen with standard management for conscious sedation during bronchoscopy. *Anaesthesia* 2018;73:169–76. <https://doi.org/10.1111/anae.14156>.
- [150] Carratalá JM, Díaz Lobato S, Brouzet B, Más-Serrano P, Espinosa B, Llorens P. Efficacy and safety of high-flow nasal cannula oxygen therapy in patients with acute heart failure. *Emerg Rev Soc Espanola Med Emerg* 2018;30:395–9.
- [151] Bräunlich J, Köhler M, Wirtz H. Nasal highflow improves ventilation in patients with COPD. *Int J Chron Obstruct Pulmon Dis* 2016;11:1077–85. <https://doi.org/10.2147/COPD.S104616>.
- [152] Longhini F, Pisani L, Lungu R, Comellini V, Bruni A, Garofalo E, et al. High-Flow Oxygen Therapy After Noninvasive Ventilation Interruption in Patients Recovering From Hypercapnic Acute Respiratory Failure: A Physiological Crossover Trial. *Crit Care Med* 2019;47:e506–11. <https://doi.org/10.1097/CCM.0000000000003740>.
- [153] Shah N, Mehta Z, Mehta Y. High-Flow Nasal Cannula Oxygen Therapy in Palliative Care #330. *J Palliat Med* 2017;20:679–80. <https://doi.org/10.1089/jpm.2017.0108>.
- [154] Modesto i Alapont V, Garcia Cuscó M, Medina A. High-Flow Oxygen Therapy in Infants with Bronchiolitis. *N Engl J Med* 2018;378:2444. <https://doi.org/10.1056/NEJMc1805312>.
- [155] Mayfield S, Jauncey-Cooke J, Hough JL, Schibler A, Gibbons K, Bogossian F. High-flow nasal cannula therapy for respiratory support in children. *Cochrane Database Syst Rev* 2014;CD009850. <https://doi.org/10.1002/14651858.CD009850.pub2>.
- [156] Beggs S, Wong ZH, Kaul S, Ogden KJ, Walters JAE. High-flow nasal cannula therapy for infants with bronchiolitis. *Cochrane Database Syst Rev* 2014;CD009609. <https://doi.org/10.1002/14651858.CD009609.pub2>.
- [157] Lin J, Zhang Y, Xiong L, Liu S, Gong C, Dai J. High-flow nasal cannula therapy for children with bronchiolitis: a systematic review and meta-analysis. *Arch Dis Child* 2019;104:564–76. <https://doi.org/10.1136/archdischild-2018-315846>.



- [158] Franklin D, Babl FE, Schlapbach LJ, Oakley E, Craig S, Neutze J, et al. A Randomized Trial of High-Flow Oxygen Therapy in Infants with Bronchiolitis. *N Engl J Med* 2018;378:1121–31. <https://doi.org/10.1056/NEJMoa1714855>.
- [159] Mayordomo-Colunga J, Medina A. High-flow nasal cannula oxygenation for everyone? Not so fast! *Med Intensiva* 2017;41:391–3. <https://doi.org/10.1016/j.medin.2017.03.003>.
- [160] Wolfler A, Raimondi G, Pagan de Paganis C, Zoia E. The infant with severe bronchiolitis: from high flow nasal cannula to continuous positive airway pressure and mechanical ventilation. *Minerva Pediatr* 2018;70:612–22. <https://doi.org/10.23736/S0026-4946.18.05358-6>.
- [161] Ramnarayan P, Schibler A. Glass half empty or half full? The story of high-flow nasal cannula therapy in critically ill children. *Intensive Care Med* 2017;43:246–9. <https://doi.org/10.1007/s00134-016-4663-2>.
- [162] Ballesterio Y, De Pedro J, Portillo N, Martinez-Mugica O, Arana-Arri E, Benito J. Pilot Clinical Trial of High-Flow Oxygen Therapy in Children with Asthma in the Emergency Service. *J Pediatr* 2018;194:204-210.e3. <https://doi.org/10.1016/j.jpeds.2017.10.075>.
- [163] Testa G, Iodice F, Ricci Z, Vitale V, De Razza F, Haiberger R, et al. Comparative evaluation of high-flow nasal cannula and conventional oxygen therapy in paediatric cardiac surgical patients: a randomized controlled trial. *Interact Cardiovasc Thorac Surg* 2014;19:456–61. <https://doi.org/10.1093/icvts/ivu171>.
- [164] Roehr CC, Yoder BA, Davis PG, Ives K. Evidence Support and Guidelines for Using Heated, Humidified, High-Flow Nasal Cannulae in Neonatology: Oxford Nasal High-Flow Therapy Meeting, 2015. *Clin Perinatol* 2016;43:693–705. <https://doi.org/10.1016/j.clp.2016.07.006>.
- [165] Manley BJ, Owen LS. High-flow nasal cannula: Mechanisms, evidence and recommendations. *Semin Fetal Neonatal Med* 2016;21:139–45. <https://doi.org/10.1016/j.siny.2016.01.002>.
- [166] Schmidbauer W, Ahlers O, Spies C, Dreyer A, Mager G, Kerner T. Early prehospital use of non-invasive ventilation improves acute respiratory failure in acute exacerbation of chronic obstructive pulmonary disease. *Emerg Med J EMJ* 2011;28:626–7. <https://doi.org/10.1136/emj.2009.089102>.
- [167] Pandor A, Thokala P, Goodacre S, Poku E, Stevens JW, Ren S, et al. Pre-hospital non-invasive ventilation for acute respiratory failure: a systematic review and cost-effectiveness evaluation. *Health Technol Assess Winch Engl* 2015;19:v–vi, 1–102. <https://doi.org/10.3310/hta19420>.
- [168] Kosowsky JM, Stephanides SL, Branson RD, Sayre MR. Prehospital use of continuous positive airway pressure (CPAP) for presumed pulmonary edema: a preliminary case series. *Prehospital Emerg Care Off J Natl Assoc EMS Physicians Natl Assoc State EMS Dir* 2001;5:190–6.
- [169] Ducros L, Logeart D, Vicaut E, Henry P, Plaisance P, Collet J-P, et al. CPAP for acute cardiogenic pulmonary oedema from out-of-hospital to cardiac intensive care unit: a randomised multicentre study. *Intensive Care Med* 2011;37:1501–9. <https://doi.org/10.1007/s00134-011-2311-4>.
- [170] Goodacre S, Stevens JW, Pandor A, Poku E, Ren S, Cantrell A, et al. Prehospital noninvasive ventilation for acute respiratory failure: systematic review, network



- meta-analysis, and individual patient data meta-analysis. *Acad Emerg Med Off J Soc Acad Emerg Med* 2014;21:960–70. <https://doi.org/10.1111/acem.12466>.
- [171] Baird JS, Spiegelman JB, Prianti R, Frudak S, Schleien CL. Noninvasive ventilation during pediatric interhospital ground transport. *Prehospital Emerg Care Off J Natl Assoc EMS Physicians Natl Assoc State EMS Dir* 2009;13:198–202. <https://doi.org/10.1080/10903120802706112>.
- [172] Millán N, Alejandro C, Martínez-Planas A, Caritg J, Esteban E, Pons-Òdena M. Noninvasive Respiratory Support During Pediatric Ground Transport: Implementation of a Safe and Feasible Procedure. *Respir Care* 2017;62:558–65. <https://doi.org/10.4187/respcare.05253>.
- [173] Schlapbach LJ, Schaefer J, Brady A-M, Mayfield S, Schibler A. High-flow nasal cannula (HFNC) support in interhospital transport of critically ill children. *Intensive Care Med* 2014;40:592–9. <https://doi.org/10.1007/s00134-014-3226-7>.
- [174] Pons-Òdena M, Medina A, Modesto V, Martín-Mateos MA, Tan W, Escuredo L, et al. [What are the most reliable predictive factors of non-invasive ventilation failure in paediatric intensive care units?]. *An Pediatr Barc Spain* 2003 2019. <https://doi.org/10.1016/j.anpedi.2019.01.013>.
- [175] Viscusi CD, Pacheco GS. Pediatric Emergency Noninvasive Ventilation. *Emerg Med Clin North Am* 2018;36:387–400. <https://doi.org/10.1016/j.emc.2017.12.007>.
- [176] Koga T, Tokuyama K, Itano A, Morita E, Ueda Y, Katsunuma T. Usefulness of modified Pulmonary Index Score (mPIS) as a quantitative tool for the evaluation of severe acute exacerbation in asthmatic children. *Allergol Int Off J Jpn Soc Allergol* 2015;64:139–44. <https://doi.org/10.1016/j.alit.2014.10.003>.
- [177] Moraa I, Sturman N, McGuire TM, van Driel ML. Heliox for croup in children. *Cochrane Database Syst Rev* 2018;10:CD006822. <https://doi.org/10.1002/14651858.CD006822.pub5>.
- [178] Flores-González JC, Matamala-Morillo MA, Rodríguez-Campoy P, Pérez-Guerrero JJ, Serrano-Moyano B, Comino-Vazquez P, et al. Epinephrine Improves the Efficacy of Nebulized Hypertonic Saline in Moderate Bronchiolitis: A Randomised Clinical Trial. *PloS One* 2015;10:e0142847. <https://doi.org/10.1371/journal.pone.0142847>.
- [179] Mayordomo-Colunga J, Medina A, Rey C, Díaz JJ, Concha A, Los Arcos M, et al. Predictive factors of non invasive ventilation failure in critically ill children: a prospective epidemiological study. *Intensive Care Med* 2009;35:527–36. <https://doi.org/10.1007/s00134-008-1346-7>.
- [180] Dohna-Schwake C, Stehling F, Tschiedel E, Wallot M, Mellies U. Non-invasive ventilation on a pediatric intensive care unit: feasibility, efficacy, and predictors of success. *Pediatr Pulmonol* 2011;46:1114–20. <https://doi.org/10.1002/ppul.21482>.
- [181] Bernet V, Hug MI, Frey B. Predictive factors for the success of noninvasive mask ventilation in infants and children with acute respiratory failure. *Pediatr Crit Care Med J Soc Crit Care Med World Fed Pediatr Intensive Crit Care Soc* 2005;6:660–4.

- [182] Corrado A, Roussos C, Ambrosino N, Confalonieri M, Cuvelier A, Elliott M, et al. Respiratory intermediate care units: a European survey. *Eur Respir J* 2002;20:1343–50.
- [183] Torres A, Ferrer M, Blanquer JB, Calle M, Casolívé V, Echave JM, et al. [Intermediate respiratory intensive care units: definitions and characteristics]. *Arch Bronconeumol* 2005;41:505–12.
- [184] Fedor KL. Noninvasive Respiratory Support in Infants and Children. *Respir Care* 2017;62:699–717. <https://doi.org/10.4187/respcare.05244>.
- [185] Beck J, Emeriaud G, Liu Y, Sinderby C. Neurally-adjusted ventilatory assist (NAVA) in children: a systematic review. *Minerva Anestesiol* 2016;82:874–83.
- [186] Medina Villanueva A, Pilar Orive FJ, Grupo de Trabajo de Respiratorio SECIP. Manual de ventilación mecánica pediátrica y neonatal. Ergon, Madrid; 2015.
- [187] Ing RJ, Bills C, Merritt G, Ragusa R, Bremner RM, Bellia F. Role of Helmet-Delivered Noninvasive Pressure Support Ventilation in COVID-19 Patients. *J Cardiothorac Vasc Anesth* 2020. <https://doi.org/10.1053/j.jvca.2020.04.060>.
- [188] Coppo A, Bellani G, Winterton D, Di Pierro M, Soria A, Faverio P, et al. Feasibility and physiological effects of prone positioning in non-intubated patients with acute respiratory failure due to COVID-19 (PRON-COVID): a prospective cohort study. *Lancet Respir Med* 2020. [https://doi.org/10.1016/S2213-2600\(20\)30268-X](https://doi.org/10.1016/S2213-2600(20)30268-X).
- [189] Oto J, Imanaka H, Nishimura M. Clinical factors affecting inspired gas humidification and oral dryness during noninvasive ventilation. *J Crit Care* 2011;26:535.e9-535.e15. <https://doi.org/10.1016/j.jcrc.2010.10.005>.
- [190] Nava S, Navalesi P, Gregoret C. Interfaces and humidification for noninvasive mechanical ventilation. *Respir Care* 2009;54:71–84.
- [191] Lellouche F, Maggiore SM, Lyazidi A, Deye N, Taillé S, Brochard L. Water content of delivered gases during non-invasive ventilation in healthy subjects. *Intensive Care Med* 2009;35:987–95. <https://doi.org/10.1007/s00134-009-1455-y>.
- [192] Sutherasan Y, Ball L, Raimondo P, Caratto V, Sanguineti E, Costantino F, et al. Effects of ventilator settings, nebulizer and exhalation port position on albuterol delivery during non-invasive ventilation: an in-vitro study. *BMC Pulm Med* 2017;17:9. <https://doi.org/10.1186/s12890-016-0347-5>.
- [193] Wong DT, Tam AD, Van Zundert TCRV. The usage of the Boussignac continuous positive airway pressure system in acute respiratory failure. *Minerva Anestesiol* 2013;79:564–70.
- [194] Maitre B, Jaber S, Maggiore SM, Bergot E, Richard JC, Bakthiari H, et al. Continuous positive airway pressure during fiberoptic bronchoscopy in hypoxemic patients. A randomized double-blind study using a new device. *Am J Respir Crit Care Med* 2000;162:1063–7. <https://doi.org/10.1164/ajrccm.162.3.9910117>.
- [195] Helviz Y, Einav S. A Systematic Review of the High-flow Nasal Cannula for Adult Patients. *Crit Care Lond Engl* 2018;22:71. <https://doi.org/10.1186/s13054-018-1990-4>.
- [196] Vargas F, Thille AW, Lyazidi A, Brochard L. NIV for acute respiratory failure: modes of ventilation and ventilators. *Non Invasive Vent., vol. Chapter 11. 2ª*, *Eur Respir Mon*; 2008, p. 154–72.



- [197] Briones Claudett KH, Briones Claudett M, Chung Sang Wong M, Nuques Martinez A, Soto Espinoza R, Montalvo M, et al. Noninvasive mechanical ventilation with average volume assured pressure support (AVAPS) in patients with chronic obstructive pulmonary disease and hypercapnic encephalopathy. *BMC Pulm Med* 2013;13:12. <https://doi.org/10.1186/1471-2466-13-12>.
- [198] Bouhemad B, Brisson H, Le-Guen M, Arbelot C, Lu Q, Rouby J-J. Bedside ultrasound assessment of positive end-expiratory pressure-induced lung recruitment. *Am J Respir Crit Care Med* 2011;183:341–7. <https://doi.org/10.1164/rccm.201003-0369OC>.
- [199] Heili-Frades S, Suarez-Sipmann F, Santos A, Carballosa MP, Naya-Prieto A, Castilla-Reparaz C, et al. Continuous monitoring of intrinsic PEEP based on expired CO2 kinetics: an experimental validation study. *Crit Care Lond Engl* 2019;23:192. <https://doi.org/10.1186/s13054-019-2430-9>.
- [200] Bernardi E, Pisani L, Fasano L, Lauria G, Comellini V, Appendini L, et al. A New Ultrasound Method for Estimating Dynamic Intrinsic Positive Airway Pressure: A Prospective Clinical Trial. *Am J Respir Crit Care Med* 2018;198:392–6. <https://doi.org/10.1164/rccm.201706-1292LE>.
- [201] Lovas A, Németh MF, Trásy D, Molnár Z. Lung recruitment can improve oxygenation in patients ventilated in continuous positive airway pressure/pressure support mode. *Front Med* 2015;2:25. <https://doi.org/10.3389/fmed.2015.00025>.
- [202] Bittencourt HS, Reis HFCD, Lima MS, Gomes M. Non-Invasive Ventilation in Patients with Heart Failure: A Systematic Review and Meta-Analysis. *Arq Bras Cardiol* 2017;108:161–8. <https://doi.org/10.5935/abc.20170001>.
- [203] Schreiber A, DI Marco F, Braidó F, Solidoro P. High flow nasal cannula oxygen therapy, work in progress in respiratory critical care. *Minerva Med* 2016;107:14–20.
- [204] El-Farghali OG. High-Flow Nasal Cannula in Neonates. *Respir Care* 2017;62:641–2. <https://doi.org/10.4187/respcare.05566>.
- [205] Zhu Y, Yin H, Zhang R, Wei J. High-flow nasal cannula oxygen therapy versus conventional oxygen therapy in patients with acute respiratory failure: a systematic review and meta-analysis of randomized controlled trials. *BMC Pulm Med* 2017;17:201. <https://doi.org/10.1186/s12890-017-0525-0>.
- [206] Okuda M, Tanaka N, Naito K, Kumada T, Fukuda K, Kato Y, et al. Evaluation by various methods of the physiological mechanism of a high-flow nasal cannula (HFNC) in healthy volunteers. *BMJ Open Respir Res* 2017;4:e000200. <https://doi.org/10.1136/bmjresp-2017-000200>.
- [207] Groves N, Tobin A. High flow nasal oxygen generates positive airway pressure in adult volunteers. *Aust Crit Care Off J Confed Aust Crit Care Nurses* 2007;20:126–31. <https://doi.org/10.1016/j.aucc.2007.08.001>.
- [208] Artacho Ruiz R, López Romero S, Guzmán Pérez JA, López Obispo M, Galán Doval CJ, Campo ED. Soporte respiratorio de alto flujo con cánula nasal. *Rev Patol Respir* 2016;19:48–55.
- [209] Duiverman ML, Huberts AS, van Eykern LA, Bladder G, Wijkstra PJ. Respiratory muscle activity and patient-ventilator asynchrony during different settings of noninvasive ventilation in stable hypercapnic COPD: does high inspiratory

- pressure lead to respiratory muscle unloading? *Int J Chron Obstruct Pulmon Dis* 2017;12:243–57. <https://doi.org/10.2147/COPD.S119959>.
- [210] Antonaglia V, Ferluga M, Capitanio G, Lucangelo U, Piller F, Roman-Pognuz E, et al. Respiratory mechanics in COPD patients who failed non-invasive ventilation: role of intrinsic PEEP. *Respir Physiol Neurobiol* 2012;184:35–40. <https://doi.org/10.1016/j.resp.2012.07.009>.
- [211] Szkulmowski Z, Belkhouja K, Le Q-H, Robert D, Argaud L. Bilevel positive airway pressure ventilation: factors influencing carbon dioxide rebreathing. *Intensive Care Med* 2010;36:688–91. <https://doi.org/10.1007/s00134-010-1774-z>.
- [212] Landry SA, Joosten SA, Eckert DJ, Jordan AS, Sands SA, White DP, et al. Therapeutic CPAP Level Predicts Upper Airway Collapsibility in Patients With Obstructive Sleep Apnea. *Sleep* 2017;40. <https://doi.org/10.1093/sleep/zsx056>.
- [213] Goulet R, Hess D, Kacmarek RM. Pressure vs flow triggering during pressure support ventilation. *Chest* 1997;111:1649–53. <https://doi.org/10.1378/chest.111.6.1649>.
- [214] Chiumello D, Pelosi P, Croci M, Bigatello LM, Gattinoni L. The effects of pressurization rate on breathing pattern, work of breathing, gas exchange and patient comfort in pressure support ventilation. *Eur Respir J* 2001;18:107–14.
- [215] Nilsestuen JO, Hargett KD. Using ventilator graphics to identify patient-ventilator asynchrony. *Respir Care* 2005;50:202–34; discussion 232–234.
- [216] Tassaux D, Gainnier M, Battisti A, Joliet P. Impact of expiratory trigger setting on delayed cycling and inspiratory muscle workload. *Am J Respir Crit Care Med* 2005;172:1283–9. <https://doi.org/10.1164/rccm.200407-880OC>.
- [217] Roca O, Hernández G, Díaz-Lobato S, Carratalá JM, Gutiérrez RM, Masclans JR, et al. Current evidence for the effectiveness of heated and humidified high flow nasal cannula supportive therapy in adult patients with respiratory failure. *Crit Care Lond Engl* 2016;20:109. <https://doi.org/10.1186/s13054-016-1263-z>.
- [218] Roca O, Caralt B, Messika J, Samper M, Sztrymf B, Hernández G, et al. An Index Combining Respiratory Rate and Oxygenation to Predict Outcome of Nasal High-Flow Therapy. *Am J Respir Crit Care Med* 2019;199:1368–76. <https://doi.org/10.1164/rccm.201803-0589OC>.
- [219] Díaz Lobato S, Mayoralas Alises S. [New approaches to the treatment of respiratory failure: High flow therapy]. *Med Clin (Barc)* 2016;147:397–8. <https://doi.org/10.1016/j.medcli.2016.09.001>.
- [220] Mehta S, Hill NS. Noninvasive ventilation. *Am J Respir Crit Care Med* 2001;163:540–77. <https://doi.org/10.1164/ajrccm.163.2.9906116>.
- [221] Delclaux C, L'Her E, Alberti C, Mancebo J, Abroug F, Conti G, et al. Treatment of acute hypoxemic nonhypercapnic respiratory insufficiency with continuous positive airway pressure delivered by a face mask: A randomized controlled trial. *JAMA* 2000;284:2352–60. <https://doi.org/10.1001/jama.284.18.2352>.
- [222] Masip J, De Mendoza D, Planas K, Paez J, Sanchez B, Cancio B. Peripheral venous blood gases and pulse-oximetry in acute cardiogenic pulmonary oedema. *Eur Heart J Acute Cardiovasc Care* 2012;1:275–80. <https://doi.org/10.1177/2048872612457087>.
- [223] Ward KR, Yealy DM. End-tidal carbon dioxide monitoring in emergency medicine, Part 2: Clinical applications. *Acad Emerg Med Off J Soc Acad Emerg Med* 1998;5:637–46.



- [224] Brochard L. Ventilation-induced lung injury exists in spontaneously breathing patients with acute respiratory failure: Yes. *Intensive Care Med* 2017;43:250–2. <https://doi.org/10.1007/s00134-016-4645-4>.
- [225] Davidson C, Banham S, Elliott M, Kennedy D, Gelder C, Glossop A, et al. British Thoracic Society/Intensive Care Society Guideline for the ventilatory management of acute hypercapnic respiratory failure in adults. *BMJ Open Respir Res* 2016;3:e000133. <https://doi.org/10.1136/bmjresp-2016-000133>.
- [226] Janssens J-P, Derivaz S, Breitenstein E, De Muralt B, Fitting J-W, Chevrolet J-C, et al. Changing patterns in long-term noninvasive ventilation: a 7-year prospective study in the Geneva Lake area. *Chest* 2003;123:67–79. <https://doi.org/10.1378/chest.123.1.67>.
- [227] Jounieaux V, Aubert G, Dury M, Delguste P, Rodenstein DO. Effects of nasal positive-pressure hyperventilation on the glottis in normal sleeping subjects. *J Appl Physiol Bethesda Md* 1985 1995;79:186–93. <https://doi.org/10.1152/jappl.1995.79.1.186>.
- [228] Parreira VF, Jounieaux V, Aubert G, Dury M, Delguste PE, Rodenstein DO. Nasal two-level positive-pressure ventilation in normal subjects. Effects of the glottis and ventilation. *Am J Respir Crit Care Med* 1996;153:1616–23. <https://doi.org/10.1164/ajrccm.153.5.8630611>.
- [229] Delguste P, Aubert-Tulkens G, Rodenstein DO. Upper airway obstruction during nasal intermittent positive-pressure hyperventilation in sleep. *Lancet Lond Engl* 1991;338:1295–7. [https://doi.org/10.1016/0140-6736\(91\)92593-q](https://doi.org/10.1016/0140-6736(91)92593-q).
- [230] Esteban A, Ferguson ND, Meade MO, Frutos-Vivar F, Apezteguia C, Brochard L, et al. Evolution of mechanical ventilation in response to clinical research. *Am J Respir Crit Care Med* 2008;177:170–7. <https://doi.org/10.1164/rccm.200706-893OC>.
- [231] Demoule A, Girou E, Richard J-C, Taille S, Brochard L. Benefits and risks of success or failure of noninvasive ventilation. *Intensive Care Med* 2006;32:1756–65. <https://doi.org/10.1007/s00134-006-0324-1>.
- [232] Antonelli M, Conti G, Moro ML, Esquinas A, Gonzalez-Diaz G, Confalonieri M, et al. Predictors of failure of noninvasive positive pressure ventilation in patients with acute hypoxemic respiratory failure: a multi-center study. *Intensive Care Med* 2001;27:1718–28. <https://doi.org/10.1007/s00134-001-1114-4>.
- [233] Antonelli M, Conti G, Esquinas A, Montini L, Maggiore SM, Bello G, et al. A multiple-center survey on the use in clinical practice of noninvasive ventilation as a first-line intervention for acute respiratory distress syndrome. *Crit Care Med* 2007;35:18–25. <https://doi.org/10.1097/01.CCM.0000251821.44259.F3>.
- [234] Phua J, Kong K, Lee KH, Shen L, Lim TK. Noninvasive ventilation in hypercapnic acute respiratory failure due to chronic obstructive pulmonary disease vs. other conditions: effectiveness and predictors of failure. *Intensive Care Med* 2005;31:533–9. <https://doi.org/10.1007/s00134-005-2582-8>.
- [235] Carron M, Freo U, Zorzi M, Ori C. Predictors of failure of noninvasive ventilation in patients with severe community-acquired pneumonia. *J Crit Care* 2010;25:540.e9-14. <https://doi.org/10.1016/j.jcrc.2010.02.012>.
- [236] Vignaux L, Tassaux D, Carteaux G, Roeseler J, Piquilloud L, Brochard L, et al. Performance of noninvasive ventilation algorithms on ICU ventilators during

- pressure support: a clinical study. *Intensive Care Med* 2010;36:2053–9. <https://doi.org/10.1007/s00134-010-1994-2>.
- [237] Tallman TA, Peacock WF, Emerman CL, Lopatin M, Blicher JZ, Weber J, et al. Noninvasive ventilation outcomes in 2,430 acute decompensated heart failure patients: an ADHERE Registry Analysis. *Acad Emerg Med Off J Soc Acad Emerg Med* 2008;15:355–62. <https://doi.org/10.1111/j.1553-2712.2008.00059.x>.
- [238] Rialp G, Forteza C, Muñoz D, Romero M. Role of First-Line Noninvasive Ventilation in Non-COPD Subjects With Pneumonia. *Arch Bronconeumol* 2017;53:480–8. <https://doi.org/10.1016/j.arbres.2016.08.017>.
- [239] Ozyilmaz E, Ugurlu AO, Nava S. Timing of noninvasive ventilation failure: causes, risk factors, and potential remedies. *BMC Pulm Med* 2014;14:19. <https://doi.org/10.1186/1471-2466-14-19>.
- [240] Di Marco F, Centanni S, Bellone A, Messinesi G, Pesci A, Scala R, et al. Optimization of ventilator setting by flow and pressure waveforms analysis during noninvasive ventilation for acute exacerbations of COPD: a multicentric randomized controlled trial. *Crit Care Lond Engl* 2011;15:R283. <https://doi.org/10.1186/cc10567>.
- [241] Moretti M, Cilione C, Tampieri A, Fracchia C, Marchioni A, Nava S. Incidence and causes of non-invasive mechanical ventilation failure after initial success. *Thorax* 2000;55:819–25. <https://doi.org/10.1136/thorax.55.10.819>.
- [242] Roche Campo F, Drouot X, Thille AW, Galia F, Cabello B, d'Ortho M-P, et al. Poor sleep quality is associated with late noninvasive ventilation failure in patients with acute hypercapnic respiratory failure. *Crit Care Med* 2010;38:477–85. <https://doi.org/10.1097/CCM.0b013e3181bc8243>.
- [243] Phua J, Kong K, Lee KH, Shen L, Lim TK. Noninvasive ventilation in hypercapnic acute respiratory failure due to chronic obstructive pulmonary disease vs. other conditions: effectiveness and predictors of failure. *Intensive Care Med* 2005;31:533–9. <https://doi.org/10.1007/s00134-005-2582-8>.
- [244] Pisani L, Mega C, Vaschetto R, Bellone A, Scala R, Cosentini R, et al. Oronasal mask versus helmet in acute hypercapnic respiratory failure. *Eur Respir J* 2015;45:691–9. <https://doi.org/10.1183/09031936.00053814>.
- [245] Antonaglia V, Ferluga M, Molino R, Lucangelo U, Peratoner A, Roman-Pognuz E, et al. Comparison of noninvasive ventilation by sequential use of mask and helmet versus mask in acute exacerbation of chronic obstructive pulmonary disease: a preliminary study. *Respir Int Rev Thorac Dis* 2011;82:148–54. <https://doi.org/10.1159/000324259>.
- [246] Fraticelli AT, Lellouche F, L'her E, Taillé S, Mancebo J, Brochard L. Physiological effects of different interfaces during noninvasive ventilation for acute respiratory failure. *Crit Care Med* 2009;37:939–45. <https://doi.org/10.1097/CCM.0b013e31819b575f>.
- [247] Díaz GG, Alcaraz AC, Talavera JCP, Pérez PJ, Rodríguez AE, Córdoba FG, et al. Noninvasive positive-pressure ventilation to treat hypercapnic coma secondary to respiratory failure. *Chest* 2005;127:952–60. <https://doi.org/10.1378/chest.127.3.952>.
- [248] L'Her E, Deye N, Lellouche F, Taille S, Demoule A, Fraticelli A, et al. Physiologic effects of noninvasive ventilation during acute lung injury. *Am J Respir Crit Care Med* 2005;172:1112–8. <https://doi.org/10.1164/rccm.200402-226OC>.

- [249] Muriel A, Peñuelas O, Frutos-Vivar F, Arroliga AC, Abaira V, Thille AW, et al. Impact of sedation and analgesia during noninvasive positive pressure ventilation on outcome: a marginal structural model causal analysis. *Intensive Care Med* 2015;41:1586–600. <https://doi.org/10.1007/s00134-015-3854-6>.
- [250] Rocco M, Conti G, Alessandri E, Morelli A, Spadetta G, Laderchi A, et al. Rescue treatment for noninvasive ventilation failure due to interface intolerance with remifentanyl analgo-sedation: a pilot study. *Intensive Care Med* 2010;36:2060–5. <https://doi.org/10.1007/s00134-010-2026-y>.
- [251] Worsham CM, Banzett RB, Schwartzstein RM. Air Hunger and Psychological Trauma in Ventilated COVID-19 Patients: An Urgent Problem. *Ann Am Thorac Soc* 2020. <https://doi.org/10.1513/AnnalsATS.202004-322VP>.
- [252] Frat J-P, Ragot S, Coudroy R, Constantin J-M, Girault C, Prat G, et al. Predictors of Intubation in Patients With Acute Hypoxemic Respiratory Failure Treated With a Noninvasive Oxygenation Strategy. *Crit Care Med* 2018;46:208–15. <https://doi.org/10.1097/CCM.0000000000002818>.
- [253] Plant PK, Owen JL, Elliott MW. Early use of non-invasive ventilation for acute exacerbations of chronic obstructive pulmonary disease on general respiratory wards: a multicentre randomised controlled trial. *Lancet Lond Engl* 2000;355:1931–5. [https://doi.org/10.1016/S0140-6736\(00\)02323-0](https://doi.org/10.1016/S0140-6736(00)02323-0).
- [254] Collaborative Research Group of Noninvasive Mechanical Ventilation for Chronic Obstructive Pulmonary Disease. Early use of non-invasive positive pressure ventilation for acute exacerbations of chronic obstructive pulmonary disease: a multicentre randomized controlled trial. *Chin Med J (Engl)* 2005;118:2034–40.
- [255] Lun C-T, Chan VL, Leung W-S, Cheung APS, Cheng S-L, Tsui MSN, et al. A pilot randomized study comparing two methods of non-invasive ventilation withdrawal after acute respiratory failure in chronic obstructive pulmonary disease. *Respirol Carlton Vic* 2013;18:814–9. <https://doi.org/10.1111/resp.12080>.
- [256] Sellares J, Ferrer M, Anton A, Loureiro H, Bencosme C, Alonso R, et al. Discontinuing noninvasive ventilation in severe chronic obstructive pulmonary disease exacerbations: a randomised controlled trial. *Eur Respir J* 2017;50. <https://doi.org/10.1183/13993003.01448-2016>.
- [257] Ram FSF, Picot J, Lightowler J, Wedzicha JA. Non-invasive positive pressure ventilation for treatment of respiratory failure due to exacerbations of chronic obstructive pulmonary disease. *Cochrane Database Syst Rev* 2004;CD004104. <https://doi.org/10.1002/14651858.CD004104.pub3>.
- [258] Shneerson JM, Simonds AK. Noninvasive ventilation for chest wall and neuromuscular disorders. *Eur Respir J* 2002;20:480–7.
- [259] Chu CM, Chan VL, Lin AWN, Wong IWY, Leung WS, Lai CKW. Readmission rates and life threatening events in COPD survivors treated with non-invasive ventilation for acute hypercapnic respiratory failure. *Thorax* 2004;59:1020–5. <https://doi.org/10.1136/thx.2004.024307>.
- [260] Murray I, Paterson E, Thain G, Currie GP. Outcomes following non-invasive ventilation for hypercapnic exacerbations of chronic obstructive pulmonary disease. *Thorax* 2011;66:825–6. <https://doi.org/10.1136/thx.2010.152264>.
- [261] Köhnlein T, Windisch W, Köhler D, Drabik A, Geiseler J, Hartl S, et al. Non-invasive positive pressure ventilation for the treatment of severe stable chronic



- obstructive pulmonary disease: a prospective, multicentre, randomised, controlled clinical trial. *Lancet Respir Med* 2014;2:698–705. [https://doi.org/10.1016/S2213-2600\(14\)70153-5](https://doi.org/10.1016/S2213-2600(14)70153-5).
- [262] Murphy PB, Rehal S, Arbane G, Bourke S, Calverley PMA, Crook AM, et al. Effect of Home Noninvasive Ventilation With Oxygen Therapy vs Oxygen Therapy Alone on Hospital Readmission or Death After an Acute COPD Exacerbation: A Randomized Clinical Trial. *JAMA* 2017;317:2177–86. <https://doi.org/10.1001/jama.2017.4451>.
- [263] Struik FM, Sprooten RTM, Kerstjens H a. M, Bladder G, Zijnen M, Asin J, et al. Nocturnal non-invasive ventilation in COPD patients with prolonged hypercapnia after ventilatory support for acute respiratory failure: a randomised, controlled, parallel-group study. *Thorax* 2014;69:826–34. <https://doi.org/10.1136/thoraxjnl-2014-205126>.
- [264] Ergan B, Oczkowski S, Rochweg B, Carlucci A, Chatwin M, Clini E, et al. European Respiratory Society guidelines on long-term home non-invasive ventilation for management of COPD. *Eur Respir J* 2019;54. <https://doi.org/10.1183/13993003.01003-2019>.
- [265] McNicholas WT. Chronic obstructive pulmonary disease and obstructive sleep apnoea-the overlap syndrome. *J Thorac Dis* 2016;8:236–42. <https://doi.org/10.3978/j.issn.2072-1439.2016.01.52>.
- [266] Masa JF, Corral J, Alonso ML, Ordax E, Troncoso MF, Gonzalez M, et al. Efficacy of Different Treatment Alternatives for Obesity Hypoventilation Syndrome. Pickwick Study. *Am J Respir Crit Care Med* 2015;192:86–95. <https://doi.org/10.1164/rccm.201410-1900OC>.
- [267] Hui D, Morgado M, Chisholm G, Withers L, Nguyen Q, Finch C, et al. High-flow oxygen and bilevel positive airway pressure for persistent dyspnea in patients with advanced cancer: a phase II randomized trial. *J Pain Symptom Manage* 2013;46:463–73. <https://doi.org/10.1016/j.jpainsymman.2012.10.284>.
- [268] García-Salido A, Mastro-Martínez I, Cabeza-Martín B, Oñoro G, Nieto-Moro M, Iglesias-Bouzas MI, et al. Respiratory Failure in Children With Hemato-oncological Diseases Admitted to the PICU: A Single-center Experience. *J Pediatr Hematol Oncol* 2015;37:449–54. <https://doi.org/10.1097/MPH.0000000000000377>.
- [269] Milési C, Essouri S, Pouyau R, Liet J-M, Afanetti M, Portefaix A, et al. High flow nasal cannula (HFNC) versus nasal continuous positive airway pressure (nCPAP) for the initial respiratory management of acute viral bronchiolitis in young infants: a multicenter randomized controlled trial (TRAMONTANE study). *Intensive Care Med* 2017;43:209–16. <https://doi.org/10.1007/s00134-016-4617-8>.
- [270] Pedersen MB, Vahlkvist S. Comparison of CPAP and HFNC in Management of Bronchiolitis in Infants and Young Children. *Child Basel Switz* 2017;4. <https://doi.org/10.3390/children4040028>.
- [271] Roca O, Riera J, Torres F, Masclans JR. High-flow oxygen therapy in acute respiratory failure. *Respir Care* 2010;55:408–13.
- [272] Xu Z, Li Y, Zhou J, Li X, Huang Y, Liu X, et al. High-flow nasal cannula in adults with acute respiratory failure and after extubation: a systematic review and

- meta-analysis. *Respir Res* 2018;19:202. <https://doi.org/10.1186/s12931-018-0908-7>.
- [273] Diblasi R, Courtney SE. Non-invasive Respiratory Support. *Assist. Vent. Neonate Evid.-Based Approach Newborn Respir. Care Sixth Ed.*, 2016, p. 162-179.e4. <https://doi.org/10.1016/B978-0-323-39006-4.00017-X>.
- [274] Gizzi C, Massenzi L, Pattumelli MG, Moretti C, Agostino R. Weaning of infants from non invasive ventilation. *Acta Bio-Medica Atenei Parm* 2014;85:15–9.
- [275] Liu J. Lung ultrasonography for the diagnosis of neonatal lung disease. *J Matern-Fetal Neonatal Med Off J Eur Assoc Perinat Med Fed Asia Ocean Perinat Soc Int Soc Perinat Obstet* 2014;27:856–61. <https://doi.org/10.3109/14767058.2013.844125>.
- [276] Sahni R, Schiaratura M, Polin RA. Strategies for the prevention of continuous positive airway pressure failure. *Semin Fetal Neonatal Med* 2016;21:196–203. <https://doi.org/10.1016/j.siny.2016.02.008>.
- [277] Otero DP, Domínguez DV, Fernández LH, Magariño AS, González VJ, Klepzing JVG, et al. Preventing facial pressure ulcers in patients under non-invasive mechanical ventilation: a randomised control trial. *J Wound Care* 2017;26:128–36. <https://doi.org/10.12968/jowc.2017.26.3.128>.
- [278] Amatya S, Rastogi D, Bhutada A, Rastogi S. Weaning of nasal CPAP in preterm infants: who, when and how? a systematic review of the literature. *World J Pediatr WJP* 2015;11:7–13. <https://doi.org/10.1007/s12519-014-0535-4>.
- [279] Hill NS. Complications of noninvasive ventilation. *Respir Care* 2000;45:480–1.
- [280] Longrois D, Conti G, Mantz J, Faltlhauser A, Aantaa R, Tonner P. Sedation in non-invasive ventilation: do we know what to do (and why)? *Multidiscip Respir Med* 2014;9:56. <https://doi.org/10.1186/2049-6958-9-56>.
- [281] Battistoni I, Marini M, Caretta G, Vagnarelli F, Lucà F, Biscottini E, et al. [Noninvasive ventilation and sedation: evidence and practical tools for its utilization]. *G Ital Cardiol* 2006 2017;18:513–8. <https://doi.org/10.1714/2700.27612>.
- [282] McCracken DJ, Bedawi EO, Hassan M, Stavroulias D, Rahman NM. Secondary pneumothorax in end-stage lung disease complicated by noninvasive ventilation and a persistent air leak. *Breathe Sheff Engl* 2018;14:e119–22. <https://doi.org/10.1183/20734735.027318>.
- [283] González García L, Rey C, Medina A, Mayordomo-Colunga J. Severe subcutaneous emphysema and pneumomediastinum secondary to noninvasive ventilation support in status asthmaticus. *Indian J Crit Care Med Peer-Rev Off Publ Indian Soc Crit Care Med* 2016;20:242–4. <https://doi.org/10.4103/0972-5229.180047>.
- [284] Longrois D, Conti G, Mantz J, Faltlhauser A, Aantaa R, Tonner P. Sedation in non-invasive ventilation: do we know what to do (and why)? *Multidiscip Respir Med* 2014;9:56. <https://doi.org/10.1186/2049-6958-9-56>.
- [285] Battistoni I, Marini M, Caretta G, Vagnarelli F, Lucà F, Biscottini E, et al. [Noninvasive ventilation and sedation: evidence and practical tools for its utilization]. *G Ital Cardiol* 2006 2017;18:513–8. <https://doi.org/10.1714/2700.27612>.
- [286] McCracken DJ, Bedawi EO, Hassan M, Stavroulias D, Rahman NM. Secondary pneumothorax in end-stage lung disease complicated by noninvasive ventilation

and a persistent air leak. Breathe Sheff Engl 2018;14:e119–22.  
<https://doi.org/10.1183/20734735.027318>.

## 21. Abreviaturas

|                                    |                                                                                                    |
|------------------------------------|----------------------------------------------------------------------------------------------------|
| AGA                                | Agudización grave del asma                                                                         |
| CC                                 | Comité coordinador                                                                                 |
| CPAP                               | Presión positiva continua en la vía aérea                                                          |
| EAPc                               | Edema agudo de pulmón cardiogénico                                                                 |
| EG                                 | Edad gestacional                                                                                   |
| ENM                                | Enfermedades neuromusculares                                                                       |
| EPAP                               | Presión positiva espiratoria en la vía aérea                                                       |
| EPOC                               | Enfermedad pulmonar obstructiva crónica                                                            |
| FiO <sub>2</sub>                   | Fracción inspirada de oxígeno                                                                      |
| FR                                 | Frecuencia respiratoria                                                                            |
| GT                                 | Grupo de trabajo                                                                                   |
| ICA                                | Insuficiencia cardíaca aguda                                                                       |
| IPAP                               | Presión positiva inspiratoria en la vía aérea                                                      |
| IRA                                | Insuficiencia respiratoria aguda                                                                   |
| IRC                                | Insuficiencia respiratoria crónica                                                                 |
| Kg                                 | Kilogramo                                                                                          |
| L                                  | Litros                                                                                             |
| lpm                                | Litros por minuto                                                                                  |
| min                                | Minuto                                                                                             |
| NAVA                               | Asistencia ventilatoria ajustada neuralmente                                                       |
| PaCO <sub>2</sub>                  | Presión parcial de CO <sub>2</sub> en sangre arterial                                              |
| PaO <sub>2</sub>                   | Presión parcial de oxígeno en sangre arterial                                                      |
| PaO <sub>2</sub> /FiO <sub>2</sub> | Cociente entre la presión parcial de oxígeno en sangre arterial y la fracción inspirada de oxígeno |
| PCV                                | Ventilación con presión control                                                                    |
| PEEP                               | Presión positiva al final de la espiración                                                         |
| PRE                                | Prueba de ventilación espontánea                                                                   |
| PS                                 | Presión de soporte                                                                                 |
| PSV                                | Ventilación con presión de soporte                                                                 |
| rpm                                | Respiraciones por minuto                                                                           |
| RR                                 | Riesgo relativo                                                                                    |
| S                                  | Modo asistido                                                                                      |
| S/T                                | Modo asistido con frecuencia respiratoria de respaldo.                                             |
| SAHS                               | Síndrome de apneas-hipopneas durante el sueño                                                      |

Documento Español de Consenso sobre la utilización del Soporte Respiratorio No Invasivo en el paciente con Insuficiencia Respiratoria Aguda grave

|                                    |                                                                                     |
|------------------------------------|-------------------------------------------------------------------------------------|
| SaO <sub>2</sub>                   | Saturación arterial de oxihemoglobina                                               |
| SaO <sub>2</sub> /FiO <sub>2</sub> | Cociente entre la saturación arterial de oxígeno y la fracción inspirada de oxígeno |

|                                    |                                                                                             |
|------------------------------------|---------------------------------------------------------------------------------------------|
| SARS                               | Síndrome respiratorio agudo grave                                                           |
| SDRA                               | Síndrome de distrés respiratorio agudo                                                      |
| SECIP                              | Sociedad Española de Cuidados Intensivos Pediátricos                                        |
| SEDAR                              | Sociedad Española de Anestesiología y Reanimación                                           |
| SEMES                              | Sociedad Española de Medicina de Urgencias y Emergencias                                    |
| SEMICYUC                           | Sociedad Española de Medicina Intensiva Crítica y Unidades Coronarias                       |
| SENP                               | Sociedad Española de Neumología Pediátrica                                                  |
| SEPAR                              | Sociedad Española de Neumología y Cirugía Torácica                                          |
| SHO                                | Síndrome de hipoventilación-obesidad                                                        |
| SNC                                | Sistema nervioso central                                                                    |
| SpO <sub>2</sub>                   | Saturación de oxihemoglobina medida por pulsioximetría                                      |
| SpO <sub>2</sub> /FiO <sub>2</sub> | Cociente entre la saturación arterial por pulsioximetría y la fracción inspirada de oxígeno |
| SRNI                               | Soporte respiratorio no invasivo                                                            |
| TAFCN                              | Terapia de alto flujo con cánulas nasales                                                   |
| TCO                                | Terapia convencional con oxígeno                                                            |
| TSA                                | Transporte Sanitario Aéreo                                                                  |
| UCI                                | Unidad de cuidados intensivos                                                               |
| UCIP                               | Unidades de cuidados intensivos pediátricos                                                 |
| VAS                                | Vía aérea superior                                                                          |
| VM                                 | Ventilación mecánica                                                                        |
| VMD                                | Ventilación mecánica domiciliaria                                                           |
| VMI                                | Ventilación mecánica invasiva                                                               |
| VMNI                               | Ventilación mecánica no invasiva                                                            |
| VT                                 | Volumen tidal                                                                               |
